# Supplementary material for: L-DOPA and Droxidopa: From Force Field Development to Molecular Docking into Human β2-Adrenergic Receptor
Source: MDPI journal article supplement (doi:10.3390/life12091393), 2022-09-06
Supplement: s1 [file s1]

## Supporting Information

### L-DOPA and Droxidopa: from force development to molecular docking into Human $\beta_2$ -Adrenergic Receptor

Andrea Catte,<sup>1§</sup> Akash Deep Biswas,<sup>1§</sup> Giordano Mancini,<sup>1</sup> and Vincenzo Barone<sup>1</sup>

<sup>1</sup>Scuola Normale Superiore, Piazza dei Cavalieri 7, I-56126 Pisa, Italy

<sup>§</sup>Contributed equally to this work

E-mail: [vincenzo.barone@sns.it](mailto:vincenzo.barone@sns.it); [andrea.catte@sns.it](mailto:andrea.catte@sns.it)

## Table of Contents

### Calculation of torsional profiles with subtracted Coulomb and Lennard-Jones contributions

**Figure S1.** Geometry optimized chemical structures of protonated adrenaline, zwitterionic L-DOPA and Droxidopa.

**Figure S2.** Torsional profiles derived from QM calculations and JOYCE for protonated adrenaline.

**Table S1.** Partial atomic charges and OPLS AA force field Lennard-Jones parameters of adrenaline.

**Figure S3.** OPLS AA force field parameters of adrenaline: bond lengths and force constants.

**Figure S4.** OPLS AA force field parameters of adrenaline: bond angles and force constants.

**Figure S5.** OPLS AA force field parameters of adrenaline: dihedral angles, force constants and multiplicity.

**Table S2.** Partial atomic charges and OPLS AA force field Lennard-Jones parameters of L-DOPA.

**Figure S6.** OPLS AA force field parameters of L-DOPA: bond lengths and force constants.

**Figure S7.** OPLS AA force field parameters of L-DOPA: bond angles and force constants.

**Figure S8.** OPLS AA force field parameters of L-DOPA: dihedral angles, force constants and multiplicity.

**Table S3.** OPLS AA force field Lennard-Jones parameters of Droxidopa.

**Figure S9.** OPLS AA force field parameters of Droxidopa: bond lengths and force constants.

**Figure S10.** OPLS AA force field parameters of Droxidopa: bond angles and force constants.

**Figure S11.** OPLS AA force field parameters of Droxidopa: dihedral angles, force constants and multiplicity.

**Figure S12.** Comparison of Dihedrals distributions in vacuum and water to torsional profiles obtained by QM calculations and JOYCE for protonated adrenaline.

**Table S4.** Coulomb and Lennard-Jones energies of adrenaline, L-DOPA and Droxidopa.

**Figure S13.** Comparison of protonated adrenaline dihedral angles torsional energy profiles from QM, JOYCE, QM after the subtraction of electrostatic and LJ energy contributions and fittings calculations.

**Figure S14.** Comparison of zwitterionic L-DOPA dihedral angles torsional energy profiles from QM, JOYCE, QM after the subtraction of electrostatic and Lennard-Jones (LJ) energy contributions and fittings calculations.

**Figure S15.** Comparison of zwitterionic Droxidopa dihedral angles torsional energy profiles from QM, JOYCE, QM after the subtraction of electrostatic and LJ energy contributions and fittings calculations.

**Figure S16.** Comparison of protonated adrenaline QM torsional energy profiles with Helmholtz free energy variations obtained from MD simulations performed using JOYCE and OPLS FFs.

**Figure S17.** Comparison of lowest energy binding poses obtained from AD4 and Vina molecular docking calculations for L-DOPA docked into rigid  $\beta_2$ AR models.

**Figure S18.** Comparison of lowest energy binding poses obtained from AD4 and Vina molecular docking calculations for L-DOPA docked into flexible  $\beta_2$ AR models.

**Figure S19.** Comparison of lowest energy binding poses obtained from AD4 and Vina molecular docking calculations for Droxidopa docked into rigid  $\beta_2$ AR models.

**Figure S20.** Comparison of lowest energy binding poses obtained from AD4 and Vina molecular docking calculations for Droxidopa docked into rigid  $\beta_2$ AR models.

**Table S5.** Percentage of hydrogen bond formation for different  $\beta_2$ AR-Ligand complexes from 1  $\mu$ s all atom MD simulations performed with CHARMM and OPLS AA FF parameters.

**Figure S21.** Percentage of contacts of ligands with the receptor hydrophobic residues extracted from MD simulations of  $\beta_2$ AR-catecholamine complexes performed with CHARMM and OPLS AA FFs.

**Figure S22.** Hydrogen bond network of adrenaline with key amino acids of  $\beta_2$ AR binding pocket using CHARMM and OPLS AA FFs.

**Figure S23.** Normalized number of contacts of adrenaline with  $\beta_2$ AR residues.

**Figure S24.** Comparison of lowest energy binding poses from Vina molecular docking calculations for carbidopa, foslevodopa and foscarnidopa.

**adrenaline.itp:** OPLS AA force field parameters of adrenaline generated with JOYCE.

**dopa.itp:** OPLS AA force field parameters of L-DOPA generated with JOYCE.

**droxidopa.itp:** OPLS AA force field parameters of Droxidopa generated with JOYCE.

## Calculation of torsional profiles with subtracted Coulomb and Lennard-Jones contributions

The combination rule for the OPLS AA force field is a geometric average of C6 and C12 values in the topology file, which correspond to sigma (in nm) and epsilon (in kJ/mol) values in the `ffnonbonded.itp` file, as expressed by the following equations:

$$(S1) \quad \sigma_{ij} = (\sigma_{ii}\sigma_{jj})^{1/2}$$

$$(S2) \quad \varepsilon_{ij} = (\varepsilon_{ii}\varepsilon_{jj})^{1/2}$$

which have been used to estimate Coulomb (electrostatic) and Lennard-Jones (van der Waals) contributions to torsional profiles of dihedral angles of adrenaline, L-DOPA and Droxidopa molecules. The Coulomb and Lennard-Jones energy contributions were calculated using the following equations:

$$(S3) \quad V_c(r_{ij}) = \frac{q_i q_j}{4\pi\varepsilon_0\varepsilon_r r_{ij}}$$

$$(S4) \quad V_{LJ}(r_{ij}) = 4\varepsilon_{ij} \left( \frac{\sigma_{ij}}{r_{ij}} \right)^{12} - 4\varepsilon_{ij} \left( \frac{\sigma_{ij}}{r_{ij}} \right)^6$$

equations S1 and S2, and the distance matrices obtained as output from Gaussian QM calculations for each dihedral. Minimum and maximum values of electrostatic and LJ energies for each dihedral of adrenaline, L-DOPA and Droxidopa are reported in **Table S4**. Then, electrostatic and Lennard-Jones terms estimated from equations S3 and S4 were subtracted from QM profiles energetic deltas with the fudge (0.5 for QQ and 0.5 for LJ interactions) applied only to 1-4 interactions, which is in good agreement with the usual treatment of these interactions in the OPLS AA force field, using the following equation for the torsional energy rescaling:

$$(S5) \quad E_{\text{new}} = (QM\_E - QM \text{ min}) - (Q\_E - Q\_E(QM\_min)) - (Q\_LJ - Q\_LJ(QM\_min))$$

where  $QM\_E$  is the QM torsional profile energy,  $QM \text{ min}$  is the minimum energy in the QM profile, and  $Q\_E$  and  $Q\_LJ$  are electrostatic and van der Waals contributions, respectively. Finally, these new energetic profiles were used to generate new force field parameters for adrenaline, L-DOPA and Droxidopa molecules by fitting them with linear combinations of cosine functions, depending on the multiplicity of the dihedral angle of interest.

**Figure S1**

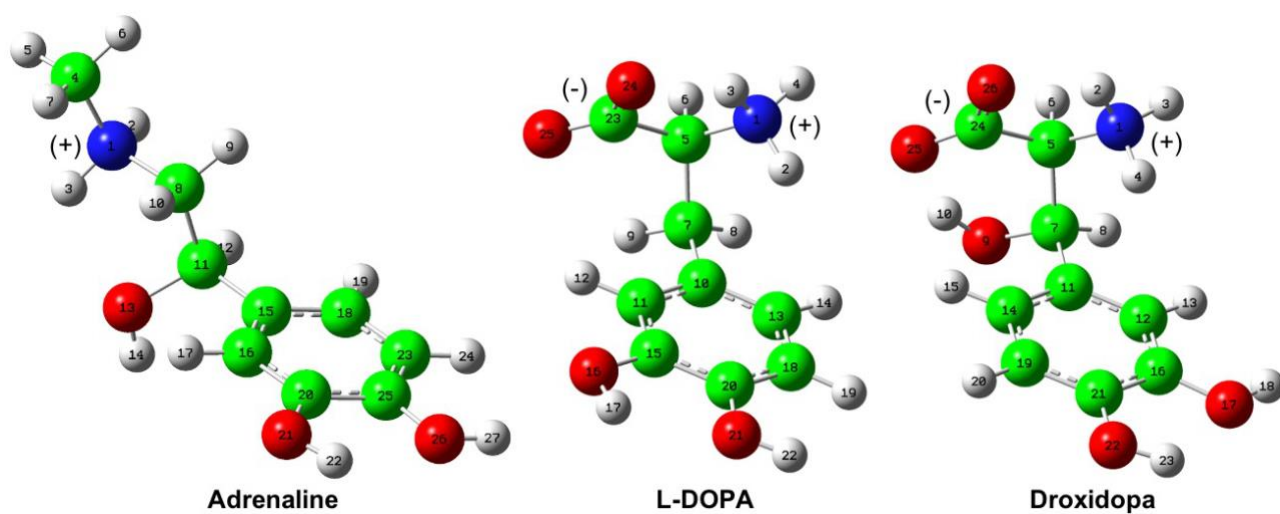

**Figure S1** Geometry optimized chemical structures of protonated adrenaline, zwitterionic L-DOPA and Droxidopa with atom numbers used for the force field development.

**Figure S2**

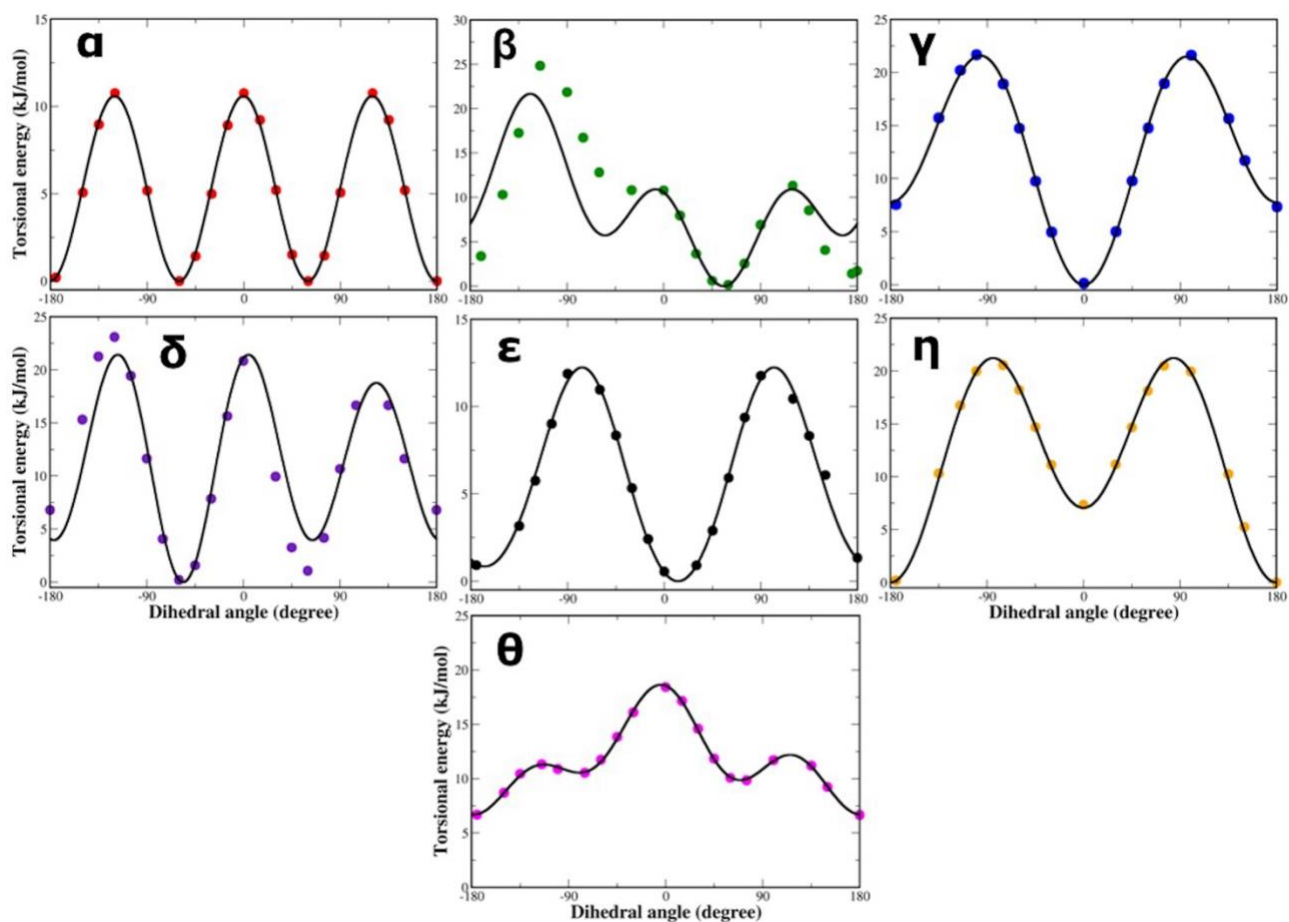

**Figure S2** Torsional profiles derived from QM calculations (dots) and JOYCE (lines) for protonated adrenaline. Each panel refers to dihedral angles defined in Figure 1. Energies are reported in kilojoules per mole (1 kJ/mol = 0.24 kcal/mol).

**Table S1**

Partial atomic charges and OPLS AA force field Lennard-Jones parameters of Adrenaline (ALE).

| Atom<br>number | Atom name | Atom type | Adrenaline |            |               |                     |
|----------------|-----------|-----------|------------|------------|---------------|---------------------|
|                |           |           | Mass (u)   | Charge (e) | $\sigma$ (nm) | $\epsilon$ (kJ/mol) |
| 1              | N         | N         | 14.0027    | -0.446343  | 0.325         | 0.71128             |
| 2              | H1        | H         | 1.00800    | 0.382023   | 0             | 0                   |
| 3              | H2        | H         | 1.00800    | 0.363936   | 0             | 0                   |
| 4              | C1        | C         | 12.0110    | -0.076781  | 0.35          | 0.276144            |
| 5              | H3        | H         | 1.00800    | 0.137222   | 0             | 0                   |
| 6              | H4        | H         | 1.00800    | 0.135202   | 0             | 0                   |
| 7              | H5        | H         | 1.00800    | 0.135338   | 0             | 0                   |
| 8              | CA        | CA        | 12.0110    | -0.024055  | 0.35          | 0.276144            |
| 9              | HA1       | HA        | 1.00800    | 0.138286   | 0.25          | 0.12552             |
| 10             | HA2       | HA        | 1.00800    | 0.133064   | 0.25          | 0.12552             |
| 11             | CB        | CB        | 12.0110    | 0.027731   | 0.35          | 0.276144            |
| 12             | HB1       | HC        | 1.00800    | 0.117273   | 0.25          | 0.12552             |
| 13             | OG        | OH        | 15.9994    | -0.422795  | 0.307         | 0.71128             |
| 14             | HG        | HH        | 1.00800    | 0.347155   | 0             | 0                   |
| 15             | CG        | CC        | 12.0110    | -0.029545  | 0.355         | 0.29288             |
| 16             | CD1       | CC        | 12.0110    | -0.104846  | 0.355         | 0.29288             |
| 17             | HD1       | HC        | 1.00800    | 0.107227   | 0.242         | 0.12552             |
| 18             | CD2       | CC        | 12.0110    | -0.101815  | 0.355         | 0.29288             |
| 19             | HD2       | HC        | 1.00800    | 0.103567   | 0.242         | 0.12552             |
| 20             | CE1       | CC        | 12.0110    | 0.073348   | 0.355         | 0.29288             |
| 21             | OE1       | OH        | 15.9994    | -0.394652  | 0.307         | 0.71128             |
| 22             | HE1       | HH        | 1.00800    | 0.340755   | 0             | 0                   |
| 23             | CE2       | CC        | 12.0110    | -0.107124  | 0.355         | 0.29288             |
| 24             | HE2       | HC        | 1.00800    | 0.112182   | 0.242         | 0.12552             |
| 25             | CZ        | CZ        | 12.0110    | 0.071847   | 0.355         | 0.29288             |
| 26             | OH        | OH        | 15.9994    | -0.381798  | 0.307         | 0.71128             |
| 27             | HH        | HH        | 1.00800    | 0.363632   | 0             | 0                   |

**Figure S3**

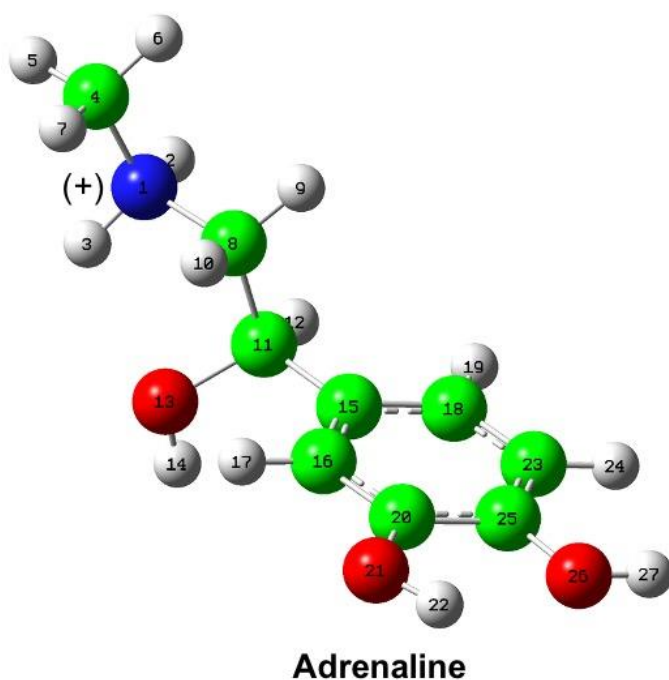

| $a_i$ | $a_j$ | type | $r_{eq}$ (nm) | $k_r$ (kJ/mol nm <sup>2</sup> ) |
|-------|-------|------|---------------|---------------------------------|
| 1     | 2     | 1    | 0.1025        | 393683.477                      |
| 1     | 4     | 1    | 0.1496        | 196521.091                      |
| 4     | 5     | 1    | 0.1094        | 328457.447                      |
| 1     | 8     | 1    | 0.1501        | 179667.704                      |
| 8     | 9     | 1    | 0.1094        | 323493.654                      |
| 8     | 11    | 1    | 0.1524        | 182391.941                      |
| 11    | 12    | 1    | 0.1102        | 301357.367                      |
| 11    | 13    | 1    | 0.1436        | 199950.22                       |
| 13    | 14    | 1    | 0.0966        | 486572.973                      |
| 11    | 15    | 1    | 0.1512        | 205697.663                      |
| 15    | 16    | 1    | 0.1403        | 339484.191                      |
| 16    | 17    | 1    | 0.109         | 332540.269                      |
| 20    | 21    | 1    | 0.1368        | 307423.405                      |
| 21    | 22    | 1    | 0.0969        | 480865.258                      |
| 25    | 26    | 1    | 0.1372        | 306132.262                      |

**Figure S3** OPLS AA force field parameters of adrenaline: bond lengths and force constants. For clarity, only a selection of the most representative bonds is reported in the table. A complete list of bonds parameters can be found in the attached adrenaline.itp file.

**Figure S4**

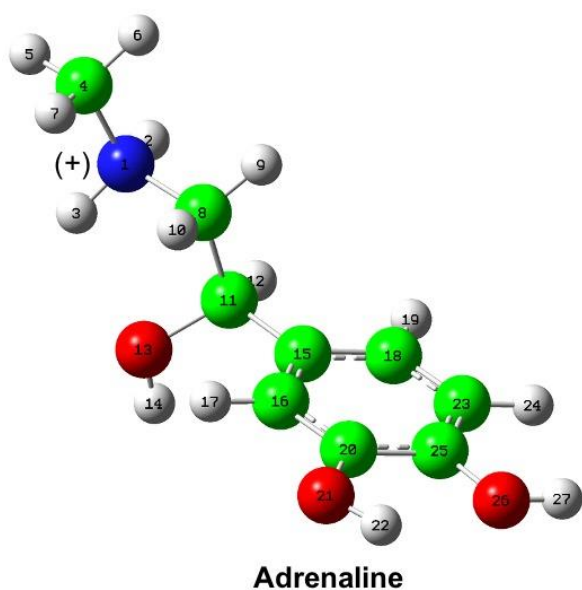

| $a_i$ | $a_j$ | $a_k$ | type | $\theta_{eq}$ (dgr) | $k_\theta$<br>(kJ/mol rad <sup>2</sup> ) |
|-------|-------|-------|------|---------------------|------------------------------------------|
| 2     | 1     | 3     | 1    | 105.8               | 366.874                                  |
| 2     | 1     | 4     | 1    | 109.51              | 373.8285                                 |
| 2     | 1     | 8     | 1    | 109.42              | 381.2262                                 |
| 1     | 4     | 5     | 1    | 108.48              | 468.3697                                 |
| 4     | 1     | 8     | 1    | 114.27              | 472.0079                                 |
| 5     | 4     | 6     | 1    | 110.52              | 309.0556                                 |
| 1     | 8     | 9     | 1    | 108.31              | 451.2013                                 |
| 1     | 8     | 11    | 1    | 109.59              | 643.5652                                 |
| 11    | 15    | 16    | 1    | 120.12              | 588.9987                                 |
| 15    | 16    | 17    | 1    | 120.97              | 293.3534                                 |
| 15    | 16    | 20    | 1    | 120.2               | 495.6412                                 |
| 16    | 20    | 21    | 1    | 119.58              | 534.1722                                 |
| 16    | 20    | 25    | 1    | 119.91              | 361.9651                                 |
| 20    | 21    | 22    | 1    | 108.56              | 522.9635                                 |
| 21    | 20    | 25    | 1    | 120.51              | 771.4094                                 |

**Figure S4** OPLS AA force field parameters of adrenaline: bond angles and force constants. For clarity, only a selection of the most representative angles is reported in the table. A complete list of angles parameters can be found in the attached adrenaline.itp file.

**Figure S5**

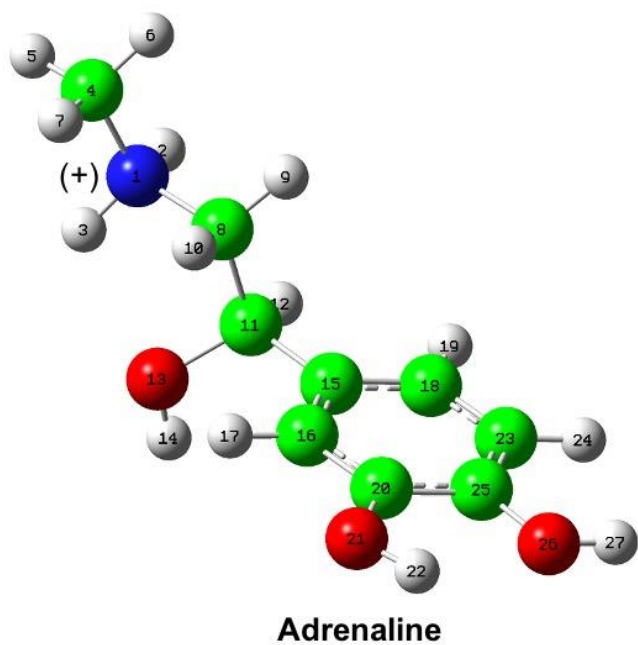

| $a_i$ | $a_j$ | $a_k$ | $a_l$ | type | $\delta_{eq}$ (dgr) | $k_\delta$<br>(kJ/mol) | n |
|-------|-------|-------|-------|------|---------------------|------------------------|---|
| 3     | 1     | 4     | 6     | 1    | 1.11                | 5.3                    | 3 |
| 2     | 1     | 8     | 9     | 1    | 270.19              | 5.179                  | 1 |
| 2     | 1     | 8     | 9     | 1    | -171.66             | 2.193                  | 2 |
| 2     | 1     | 8     | 9     | 1    | 1.25                | 3.196                  | 3 |
| 20    | 25    | 26    | 27    | 1    | -179.55             | 3.882                  | 1 |
| 20    | 25    | 26    | 27    | 1    | 179.73              | 8.726                  | 2 |
| 9     | 8     | 11    | 12    | 1    | -162.12             | 2.055                  | 1 |
| 9     | 8     | 11    | 12    | 1    | 63.42               | 1.109                  | 2 |
| 9     | 8     | 11    | 12    | 1    | -0.25               | 8.553                  | 3 |
| 9     | 8     | 11    | 12    | 1    | -6.16               | 0.163                  | 4 |
| 12    | 11    | 15    | 18    | 1    | 180.84              | 0.004                  | 1 |
| 12    | 11    | 15    | 18    | 1    | -152.83             | 5.737                  | 2 |
| 12    | 11    | 15    | 18    | 1    | 161.46              | 0.004                  | 3 |
| 12    | 11    | 15    | 18    | 1    | 17.84               | 0.217                  | 4 |
| 16    | 20    | 21    | 22    | 1    | -0.56               | 3.524                  | 1 |

**Figure S5** OPLS AA force field parameters of adrenaline: dihedral angles, force constants and multiplicity.

**Table S2**

Partial atomic charges and OPLS AA force field Lennard-Jones parameters of L-DOPA (DAH).

| Atom<br>number | Atom name | Atom type | L-DOPA   |            |               |                     |
|----------------|-----------|-----------|----------|------------|---------------|---------------------|
|                |           |           | Mass (u) | Charge (e) | $\sigma$ (nm) | $\epsilon$ (kJ/mol) |
| 1              | N         | N         | 14.0027  | -0.564145  | 0.325         | 0.71128             |
| 2              | H1        | H         | 1.00800  | 0.38029    | 0             | 0                   |
| 3              | H2        | H         | 1.00800  | 0.371986   | 0             | 0                   |
| 4              | H3        | H         | 1.00800  | 0.328559   | 0             | 0                   |
| 5              | CA        | CA        | 12.0110  | 0.028023   | 0.35          | 0.276144            |
| 6              | HA        | HA        | 1.00800  | 0.12435    | 0.25          | 0.12552             |
| 7              | CB        | CB        | 12.0110  | -0.134714  | 0.35          | 0.276144            |
| 8              | HB1       | HA        | 1.00800  | 0.102968   | 0.25          | 0.12552             |
| 9              | HB2       | HA        | 1.00800  | 0.10481    | 0.25          | 0.12552             |
| 10             | CG        | CC        | 12.0110  | -0.022917  | 0.355         | 0.29288             |
| 11             | CD1       | CC        | 12.0110  | -0.109878  | 0.355         | 0.29288             |
| 12             | HD1       | HC        | 1.00800  | 0.104159   | 0.242         | 0.12552             |
| 13             | CD2       | CC        | 12.0110  | -0.109974  | 0.355         | 0.29288             |
| 14             | HD2       | HC        | 1.00800  | 0.100022   | 0.242         | 0.12552             |
| 15             | CE1       | CC        | 12.0110  | 0.067123   | 0.355         | 0.29288             |
| 16             | OE1       | OH        | 15.9994  | -0.399226  | 0.307         | 0.71128             |
| 17             | HE1       | HH        | 1.00800  | 0.338272   | 0             | 0                   |
| 18             | CE2       | CC        | 12.0110  | -0.11227   | 0.355         | 0.29288             |
| 19             | HE2       | HC        | 1.00800  | 0.108509   | 0.242         | 0.12552             |
| 20             | CZ        | CZ        | 12.0110  | 0.062947   | 0.355         | 0.29288             |
| 21             | OH        | OH        | 15.9994  | -0.388243  | 0.307         | 0.71128             |
| 22             | HH        | HH        | 1.00800  | 0.360275   | 0             | 0                   |
| 23             | C         | C         | 12.0110  | 0.185232   | 0.375         | 0.43932             |
| 24             | O1        | O         | 15.9994  | -0.468657  | 0.296         | 0.87864             |
| 25             | O2        | O         | 15.9994  | -0.457493  | 0.296         | 0.87864             |

**Figure S6**

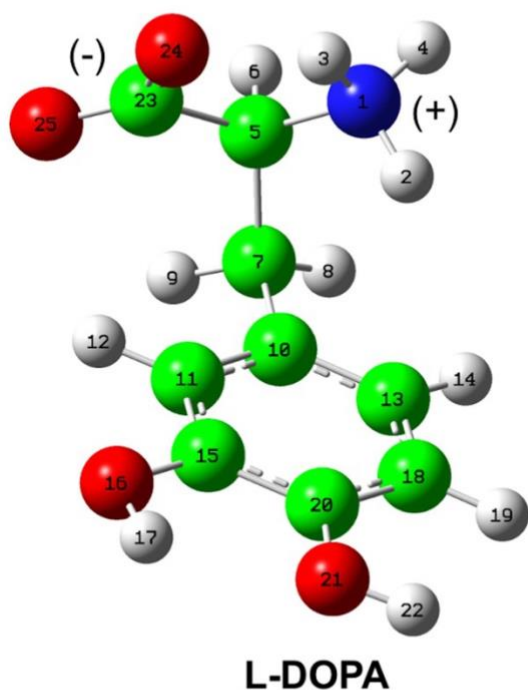

| $a_i$ | $a_j$ | type | $r_{eq}$ (nm) | $k_r$ (kJ/mol nm <sup>2</sup> ) |
|-------|-------|------|---------------|---------------------------------|
| 1     | 2     | 1    | 0.1026        | 368489.034                      |
| 1     | 5     | 1    | 0.1506        | 180341.536                      |
| 5     | 6     | 1    | 0.1095        | 318058.259                      |
| 5     | 7     | 1    | 0.1536        | 180195.043                      |
| 7     | 8     | 1    | 0.1098        | 314597.457                      |
| 7     | 10    | 1    | 0.1512        | 214106.063                      |
| 10    | 11    | 1    | 0.1405        | 332239.63                       |
| 11    | 12    | 1    | 0.109         | 331723.534                      |
| 15    | 16    | 1    | 0.1368        | 305030.302                      |
| 16    | 17    | 1    | 0.0969        | 480979.109                      |
| 15    | 20    | 1    | 0.1408        | 309763.805                      |
| 20    | 21    | 1    | 0.1374        | 305476.385                      |
| 21    | 22    | 1    | 0.0966        | 480979.109                      |
| 5     | 23    | 1    | 0.156         | 136630.345                      |
| 23    | 24    | 1    | 0.1269        | 478155.015                      |

**Figure S6** OPLS AA force field parameters of L-DOPA: bond lengths and force constants. For clarity, only a selection of the most representative bonds is reported in the table. A complete list of bonds parameters can be found in the attached dopa.itp file.

**Figure S7**

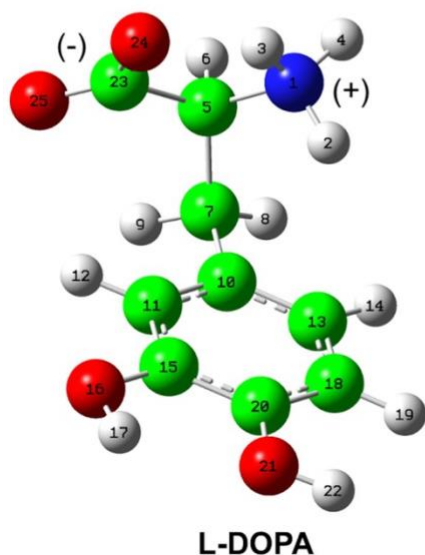

| $a_i$ | $a_j$ | $a_k$ | type | $\theta_{eq}$ (dgr) | $k_\theta$<br>(kJ/mol rad <sup>2</sup> ) |
|-------|-------|-------|------|---------------------|------------------------------------------|
| 2     | 1     | 3     | 1    | 108.76              | 338.0992                                 |
| 2     | 1     | 5     | 1    | 111.79              | 354.8638                                 |
| 1     | 5     | 6     | 1    | 107.34              | 467.6459                                 |
| 1     | 5     | 7     | 1    | 111.77              | 482.7422                                 |
| 1     | 5     | 23    | 1    | 105.54              | 528.7628                                 |
| 6     | 5     | 7     | 1    | 109.7               | 396.4863                                 |
| 6     | 5     | 23    | 1    | 107.64              | 316.9483                                 |
| 5     | 7     | 8     | 1    | 109.02              | 342.6356                                 |
| 5     | 7     | 10    | 1    | 112.82              | 622.4218                                 |
| 7     | 5     | 23    | 1    | 114.51              | 523.3779                                 |
| 9     | 7     | 10    | 1    | 111.11              | 348.8275                                 |
| 7     | 10    | 11    | 1    | 120.42              | 495.9408                                 |
| 10    | 11    | 12    | 1    | 120.47              | 295.1435                                 |
| 11    | 10    | 13    | 1    | 118.84              | 539.073                                  |
| 11    | 15    | 16    | 1    | 119.53              | 574.6185                                 |
| 11    | 15    | 20    | 1    | 120.05              | 379.8506                                 |
| 15    | 16    | 17    | 1    | 108.53              | 518.3672                                 |
| 16    | 15    | 20    | 1    | 120.42              | 796.0599                                 |
| 13    | 18    | 19    | 1    | 120.37              | 295.1435                                 |
| 13    | 18    | 20    | 1    | 119.76              | 379.8506                                 |
| 19    | 18    | 20    | 1    | 119.86              | 327.6687                                 |
| 15    | 20    | 18    | 1    | 119.9               | 99.2215                                  |
| 15    | 20    | 21    | 1    | 115.28              | 699.1805                                 |
| 20    | 21    | 22    | 1    | 110.6               | 449.2292                                 |
| 5     | 23    | 24    | 1    | 114.7               | 372.9536                                 |
| 24    | 23    | 25    | 1    | 128.67              | 683.7864                                 |

**Figure S7** OPLS AA force field parameters of L-DOPA: bond angles and force constants. For clarity, only a selection of the most representative angles is reported in the table. A complete list of angles parameters can be found in the attached dopa.itp file.

**Figure S8**

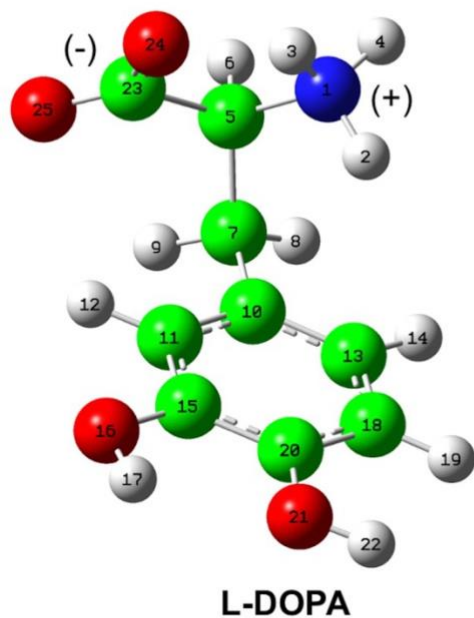

| $a_i$ | $a_j$ | $a_k$ | $a_l$ | type | $\delta_{eq}$ (dgr) | $k_\delta$ (kJ/mol) | n |
|-------|-------|-------|-------|------|---------------------|---------------------|---|
| 6     | 5     | 23    | 24    | 1    | 320.79              | 9.731               | 2 |
| 6     | 5     | 23    | 25    | 1    | 318.43              | 9.731               | 2 |
| 2     | 1     | 5     | 6     | 1    | 127.76              | 2.482               | 3 |
| 3     | 1     | 5     | 6     | 1    | 140.68              | 2.482               | 3 |
| 18    | 20    | 21    | 22    | 1    | 0                   | 3.251               | 1 |
| 18    | 20    | 21    | 22    | 1    | 179.99              | 8.441               | 2 |
| 6     | 5     | 7     | 8     | 1    | -193.73             | 5.697               | 1 |
| 6     | 5     | 7     | 8     | 1    | -94.39              | 1.592               | 2 |
| 6     | 5     | 7     | 8     | 1    | -14.05              | 6.757               | 3 |
| 6     | 5     | 7     | 8     | 1    | 8.32                | 0.158               | 4 |
| 8     | 7     | 10    | 13    | 1    | 242.4               | 0.135               | 1 |
| 8     | 7     | 10    | 13    | 1    | 199.06              | 8.06                | 2 |
| 8     | 7     | 10    | 13    | 1    | 252.02              | 0.038               | 3 |
| 8     | 7     | 10    | 13    | 1    | -62.1               | 2.03                | 4 |
| 8     | 7     | 10    | 11    | 1    | 242.4               | 0.135               | 1 |
| 8     | 7     | 10    | 11    | 1    | 199.06              | 8.06                | 2 |
| 8     | 7     | 10    | 11    | 1    | 252.02              | 0.038               | 3 |
| 8     | 7     | 10    | 11    | 1    | -62.1               | 2.03                | 4 |
| 11    | 15    | 16    | 17    | 1    | 359.82              | 3.153               | 1 |
| 11    | 15    | 16    | 17    | 1    | 179.64              | 9.114               | 2 |

**Figure S8** OPLS AA force field parameters of L-DOPA: dihedral angles, force constants and multiplicity.

**Table S3**

Partial atomic charges and OPLS AA force field Lennard-Jones parameters of Droxidopa (DRO).

| Atom<br>number | Atom name | Atom type | Droxidopa |            |               |                     |
|----------------|-----------|-----------|-----------|------------|---------------|---------------------|
|                |           |           | Mass (u)  | Charge (e) | $\sigma$ (nm) | $\epsilon$ (kJ/mol) |
| 1              | N         | N         | 14.0027   | -0.563874  | 0.325         | 0.71128             |
| 2              | H1        | H         | 1.00800   | 0.334884   | 0             | 0                   |
| 3              | H2        | H         | 1.00800   | 0.383193   | 0             | 0                   |
| 4              | H3        | H         | 1.00800   | 0.347978   | 0             | 0                   |
| 5              | CA        | CA        | 12.0110   | 0.025501   | 0.35          | 0.276144            |
| 6              | HA        | HA        | 1.00800   | 0.138072   | 0.25          | 0.12552             |
| 7              | CB        | CB        | 12.0110   | 0.018493   | 0.35          | 0.276144            |
| 8              | HB1       | HA        | 1.00800   | 0.11258    | 0.25          | 0.12552             |
| 9              | OG        | OH        | 15.9994   | -0.469561  | 0.307         | 0.71128             |
| 10             | HG        | HO        | 1.00800   | 0.286741   | 0             | 0                   |
| 11             | CG        | CC        | 12.0110   | -0.037767  | 0.355         | 0.29288             |
| 12             | CD1       | CC        | 12.0110   | -0.106979  | 0.355         | 0.29288             |
| 13             | HD1       | HC        | 1.00800   | 0.113467   | 0.242         | 0.12552             |
| 14             | CD2       | CC        | 12.0110   | -0.106878  | 0.355         | 0.29288             |
| 15             | HD2       | HC        | 1.00800   | 0.096655   | 0.242         | 0.12552             |
| 16             | CE1       | CC        | 12.0110   | 0.071455   | 0.355         | 0.29288             |
| 17             | OE1       | OH        | 15.9994   | -0.382444  | 0.307         | 0.71128             |
| 18             | HE1       | HH        | 1.00800   | 0.363284   | 0             | 0                   |
| 19             | CE2       | CC        | 12.0110   | -0.103248  | 0.355         | 0.29288             |
| 20             | HE2       | HC        | 1.00800   | 0.108686   | 0.242         | 0.12552             |
| 21             | CZ        | CZ        | 12.0110   | 0.073032   | 0.355         | 0.29288             |
| 22             | OH        | OH        | 15.9994   | -0.393531  | 0.307         | 0.71128             |
| 23             | HH        | HH        | 1.00800   | 0.341308   | 0             | 0                   |
| 24             | C         | C         | 12.0110   | 0.201167   | 0.375         | 0.43932             |
| 25             | O1        | O         | 15.9994   | -0.421581  | 0.296         | 0.87864             |
| 26             | O2        | O         | 15.9994   | -0.430621  | 0.296         | 0.87864             |

**Figure S9**

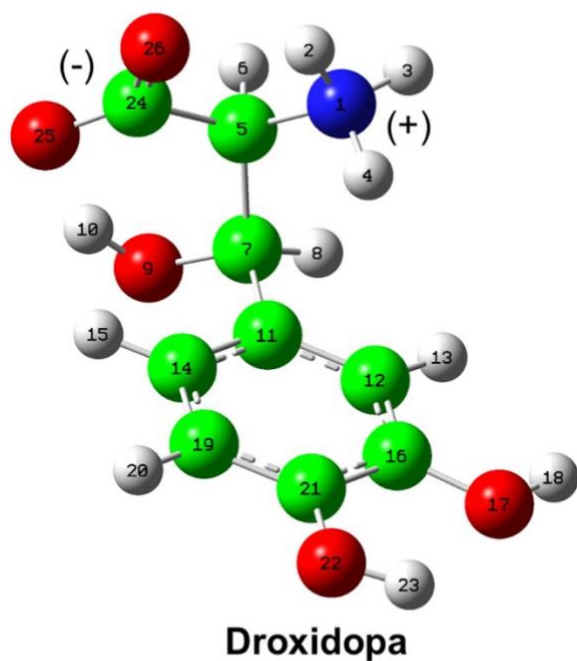

| $a_i$ | $a_j$ | type | $r_{eq}$ (nm) | $k_r$ (kJ/mol nm <sup>2</sup> ) |
|-------|-------|------|---------------|---------------------------------|
| 1     | 2     | 1    | 0.1048        | 373470.846                      |
| 1     | 5     | 1    | 0.1499        | 207081.212                      |
| 5     | 6     | 1    | 0.1096        | 317299.775                      |
| 5     | 7     | 1    | 0.1551        | 154162.502                      |
| 7     | 8     | 1    | 0.1099        | 305252.01                       |
| 7     | 9     | 1    | 0.142         | 225968.096                      |
| 9     | 10    | 1    | 0.0987        | 383776.997                      |
| 7     | 11    | 1    | 0.152         | 208485.422                      |
| 11    | 12    | 1    | 0.1404        | 316021.4                        |
| 12    | 13    | 1    | 0.1093        | 332268.673                      |
| 16    | 17    | 1    | 0.1372        | 289583.572                      |
| 17    | 18    | 1    | 0.0966        | 481033.117                      |
| 16    | 21    | 1    | 0.1404        | 321359.557                      |
| 5     | 24    | 1    | 0.1558        | 132339.541                      |
| 24    | 25    | 1    | 0.1259        | 479501.584                      |

**Figure S9** OPLS AA force field parameters of Droxidopa: bond lengths and force constants. For clarity, only a selection of the most representative bonds is reported in the table. A complete list of bonds parameters can be found in the attached droxidopa.itp file.

**Figure S10**

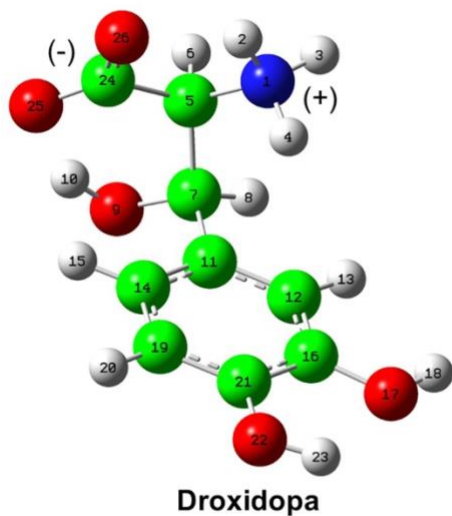

| $a_i$ | $a_j$ | $a_k$ | type | $\theta_{eq}$ (dgr) | $k_\theta$<br>(kJ/mol rad <sup>2</sup> ) |
|-------|-------|-------|------|---------------------|------------------------------------------|
| 2     | 1     | 3     | 1    | 111.49              | 343.4745                                 |
| 2     | 1     | 5     | 1    | 102.59              | 361.7045                                 |
| 1     | 5     | 6     | 1    | 107.66              | 519.9423                                 |
| 1     | 5     | 7     | 1    | 111.87              | 553.7967                                 |
| 1     | 5     | 24    | 1    | 105.89              | 484.0496                                 |
| 6     | 5     | 7     | 1    | 108.85              | 417.8032                                 |
| 6     | 5     | 24    | 1    | 107.9               | 291.6417                                 |
| 5     | 7     | 8     | 1    | 107.6               | 419.7621                                 |
| 5     | 7     | 9     | 1    | 108.48              | 744.6744                                 |
| 5     | 7     | 11    | 1    | 111.66              | 365.07                                   |
| 7     | 5     | 24    | 1    | 114.39              | 468.9387                                 |
| 8     | 7     | 9     | 1    | 106.95              | 492.3242                                 |
| 8     | 7     | 11    | 1    | 107.98              | 276.5572                                 |
| 7     | 9     | 10    | 1    | 105.6               | 632.6532                                 |
| 9     | 7     | 11    | 1    | 113.89              | 449.8951                                 |
| 7     | 11    | 12    | 1    | 119.34              | 687.2295                                 |
| 11    | 12    | 13    | 1    | 120.26              | 298.4541                                 |
| 12    | 11    | 14    | 1    | 119.01              | 496.0446                                 |
| 12    | 16    | 17    | 1    | 124.4               | 731.9646                                 |
| 12    | 16    | 21    | 1    | 120.09              | 377.2683                                 |
| 16    | 17    | 18    | 1    | 110.69              | 453.9904                                 |
| 17    | 16    | 21    | 1    | 115.5               | 634.4644                                 |
| 20    | 19    | 21    | 1    | 118.8               | 323.2446                                 |
| 16    | 21    | 19    | 1    | 119.52              | 209.44                                   |
| 16    | 21    | 22    | 1    | 120.77              | 671.056                                  |
| 21    | 22    | 23    | 1    | 108.62              | 481.9262                                 |
| 5     | 24    | 25    | 1    | 116.12              | 324.2452                                 |
| 25    | 24    | 26    | 1    | 128.37              | 813.2475                                 |

**Figure S10** OPLS AA force field parameters of Droxidopa: bond angles and force constants. For clarity, only a selection of the most representative angles is reported in the table. A complete list of angles parameters can be found in the attached droxidopa.itp file.

**Figure S11**

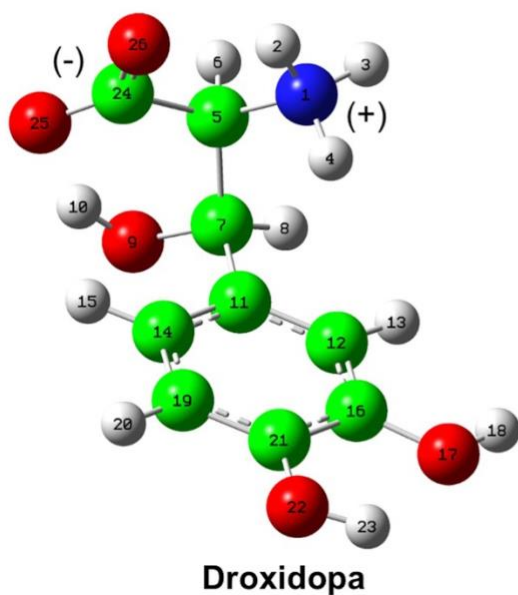

| $a_i$ | $a_j$ | $a_k$ | $a_l$ | type | $\delta_{eq}$ (dgr) | $k_\delta$ (kJ/mol) | n |
|-------|-------|-------|-------|------|---------------------|---------------------|---|
| 6     | 5     | 24    | 25    | 1    | 328.39              | 10.451              | 2 |
| 6     | 5     | 24    | 26    | 1    | 330.59              | 10.451              | 2 |
| 2     | 1     | 5     | 6     | 1    | 125.59              | 2.547               | 3 |
| 3     | 1     | 5     | 6     | 1    | 123.45              | 2.547               | 3 |
| 19    | 21    | 22    | 23    | 1    | 359.86              | 3.272               | 1 |
| 19    | 21    | 22    | 23    | 1    | 179.73              | 8.853               | 2 |
| 6     | 5     | 7     | 8     | 1    | -218.42             | 3.367               | 1 |
| 6     | 5     | 7     | 8     | 1    | -87.74              | 9.305               | 2 |
| 6     | 5     | 7     | 8     | 1    | -25.06              | 9.134               | 3 |
| 6     | 5     | 7     | 8     | 1    | -144.67             | 0.009               | 4 |
| 8     | 7     | 11    | 14    | 1    | -120.9              | 0.702               | 1 |
| 8     | 7     | 11    | 14    | 1    | 185.55              | 10.437              | 2 |
| 8     | 7     | 11    | 14    | 1    | 41.83               | 0.182               | 3 |
| 8     | 7     | 11    | 14    | 1    | 0                   | 0.042               | 4 |
| 8     | 7     | 11    | 12    | 1    | -120.9              | 0.702               | 1 |
| 8     | 7     | 11    | 12    | 1    | 185.55              | 10.437              | 2 |
| 8     | 7     | 11    | 12    | 1    | 41.83               | 0.182               | 3 |
| 8     | 7     | 11    | 12    | 1    | 0                   | 0.042               | 4 |
| 12    | 16    | 17    | 18    | 1    | 0                   | 3.272               | 1 |
| 12    | 16    | 17    | 18    | 1    | 179.99              | 8.853               | 2 |
| 5     | 7     | 9     | 10    | 1    | -215.05             | 12.202              | 1 |
| 5     | 7     | 9     | 10    | 1    | 128.96              | 6.72                | 2 |
| 5     | 7     | 9     | 10    | 1    | 777.43              | 2.465               | 3 |
| 5     | 7     | 9     | 10    | 1    | 43.77               | 0.432               | 4 |

**Figure S11** OPLS AA force field parameters of Droxidopa: dihedral angles, force constants and multiplicity.

**Figure S12**

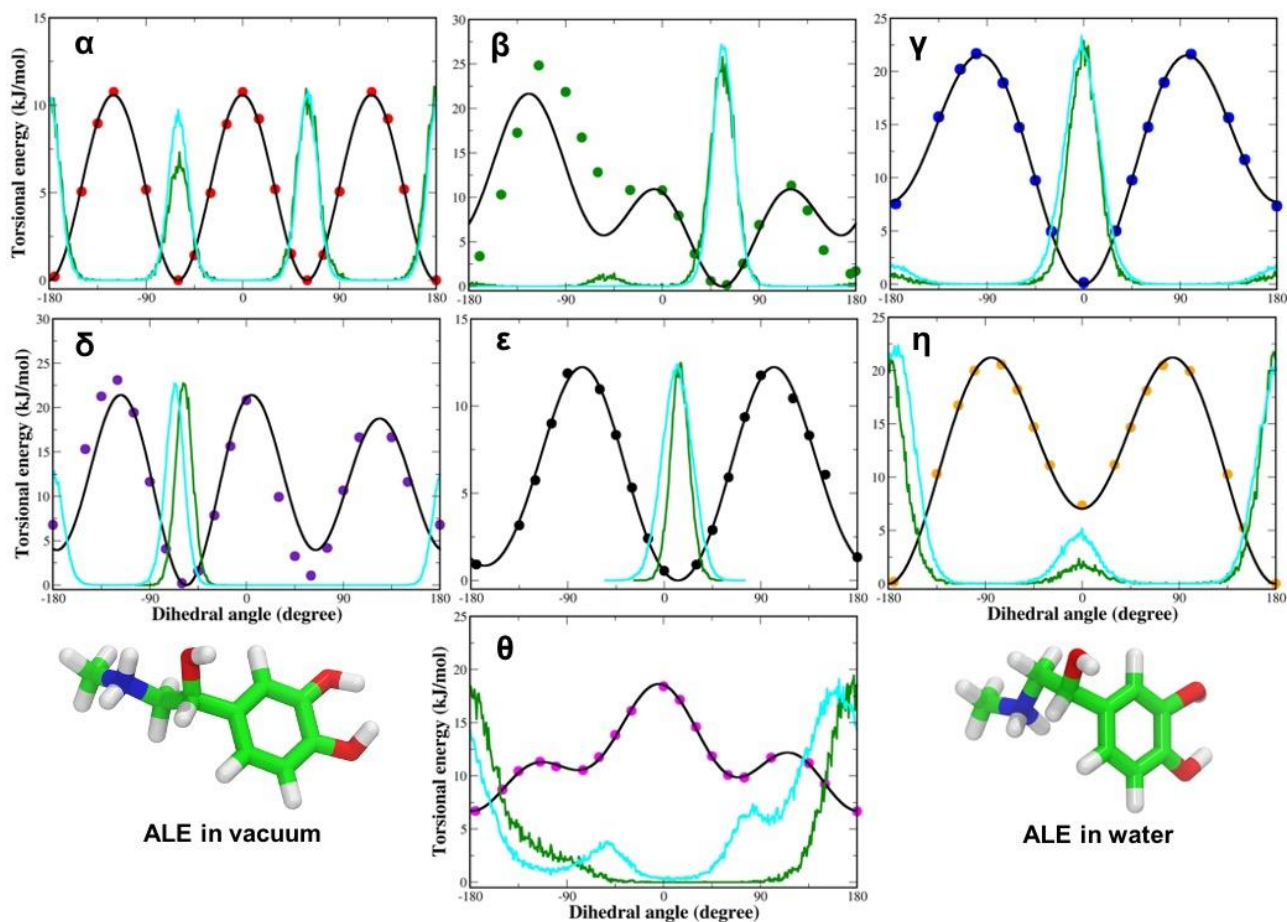

**Figure S12** (Top) Dihedrals distributions in vacuum (green) and water (cyan) are compared to torsional profiles obtained by QM calculations (dots) and JOYCE (lines) for protonated adrenaline. Each panel refers to dihedral angles defined in Figure 1. (Bottom) Adrenaline structures simulated for 20 ns and 100 ns in vacuum and water, respectively. Energies are reported in kilojoules per mole (1 kJ/mol = 0.24 kcal/mol).

**Table S4**

Minimum and maximum values of Coulomb ( $V_C$ ) and Lennard-Jones ( $V_{LJ}$ ) energies of each dihedral of Adrenaline, L-DOPA and Droxidopa molecules.

| Ligand            | Dihedral      | $V_C$ (kJ/mol)   | $V_{LJ}$ (kJ/mol)  |
|-------------------|---------------|------------------|--------------------|
| <b>Adrenaline</b> | $\alpha$      | $1.28 \div 1.30$ | $-30.8 \div -30.1$ |
|                   | $\beta$       | $1.23 \div 1.47$ | $-32.6 \div -29.4$ |
|                   | $\gamma$      | $1.34 \div 1.66$ | $-31.1 \div -29.6$ |
|                   | $\delta$      | $1.04 \div 1.71$ | $-41.6 \div -26.8$ |
|                   | $\varepsilon$ | $1.29 \div 1.44$ | $-37.5 \div -30.6$ |
|                   | $\eta$        | $1.29 \div 1.66$ | $-31.2 \div -29.4$ |
|                   | $\theta$      | $1.63 \div 1.93$ | $-27.2 \div -25.8$ |
| <b>L-DOPA</b>     | $\alpha$      | $-3.7 \div -4.2$ | $-27.4 \div -41.4$ |
|                   | $\beta$       | $-3.8 \div -4.2$ | $-37.3 \div -41.7$ |
|                   | $\gamma$      | $-4.1 \div -4.5$ | $-41.0 \div -42.5$ |
|                   | $\delta$      | $-3.9 \div -4.5$ | $-35.0 \div -44.5$ |
|                   | $\varepsilon$ | $-4.1 \div -4.4$ | $-39.5 \div -50.5$ |
|                   | $\eta$        | $-4.1 \div -4.2$ | $-40.5 \div -42.5$ |
| <b>Droxidopa</b>  | $\alpha$      | $-3.4 \div -3.8$ | $-36.4 \div -50.7$ |
|                   | $\beta$       | $-3.5 \div -3.9$ | $-48.7 \div -51.2$ |
|                   | $\gamma$      | $-3.6 \div -3.8$ | $-50.0 \div -51.3$ |
|                   | $\delta$      | $-3.6 \div -4.6$ | $-36.6 \div -59.2$ |
|                   | $\varepsilon$ | $-3.6 \div -4.1$ | $-50.8 \div -61.5$ |
|                   | $\eta$        | $-3.6 \div -4.0$ | $-49.6 \div -51.3$ |
|                   | $\theta$      | $-3.4 \div -4.1$ | $-45.6 \div -51.5$ |

**Figure S13**

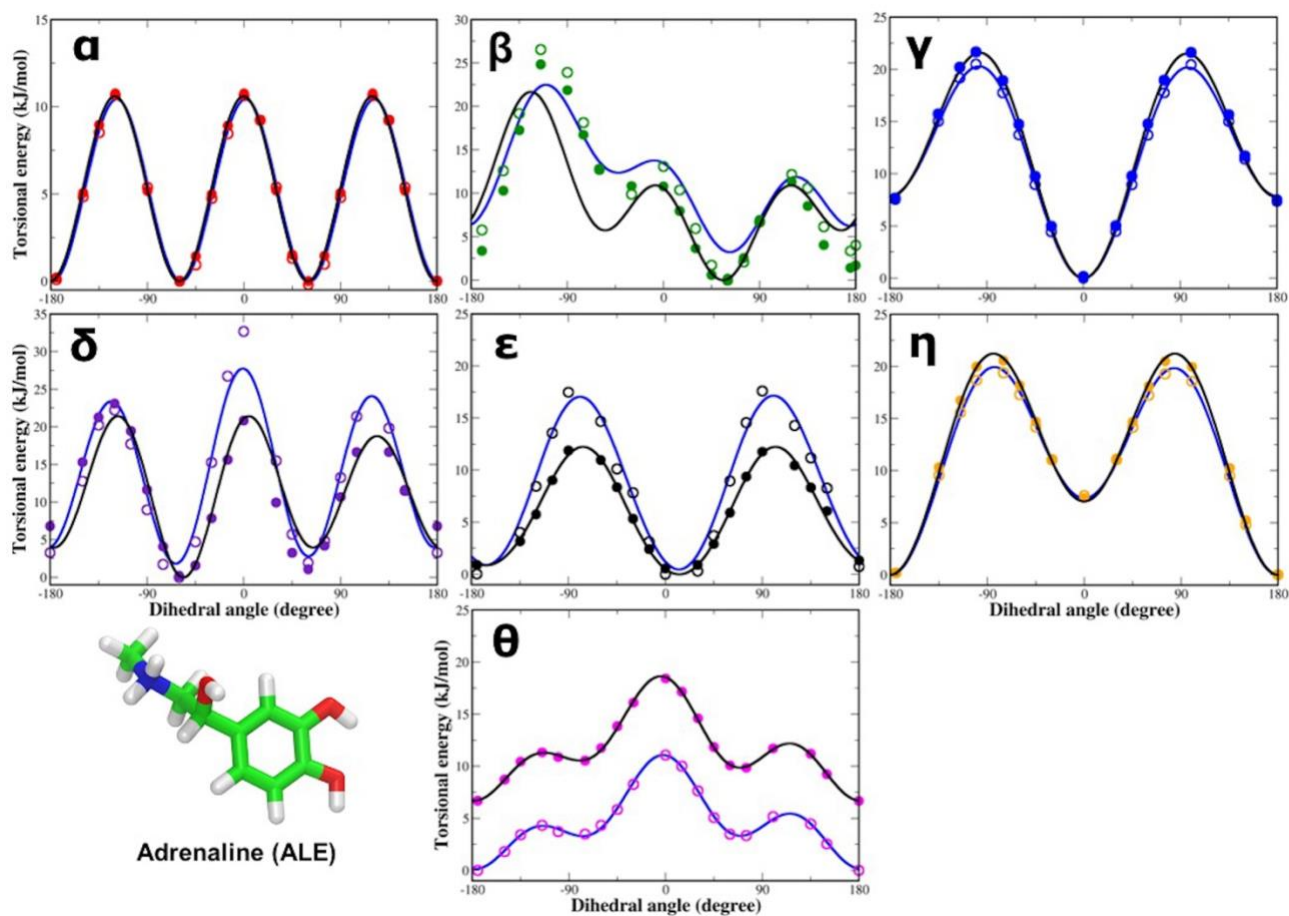

**Figure S13** Comparison of protonated adrenaline dihedral angles torsional energy profiles from QM (closed circles), JOYCE (black lines), QM after the subtraction of electrostatic and Lennard-Jones energy contributions (open circles) and fittings (blue lines) calculations. Energies are reported in kilojoules per mole (1 kJ/mol = 0.24 kcal/mol).

**Figure S14**

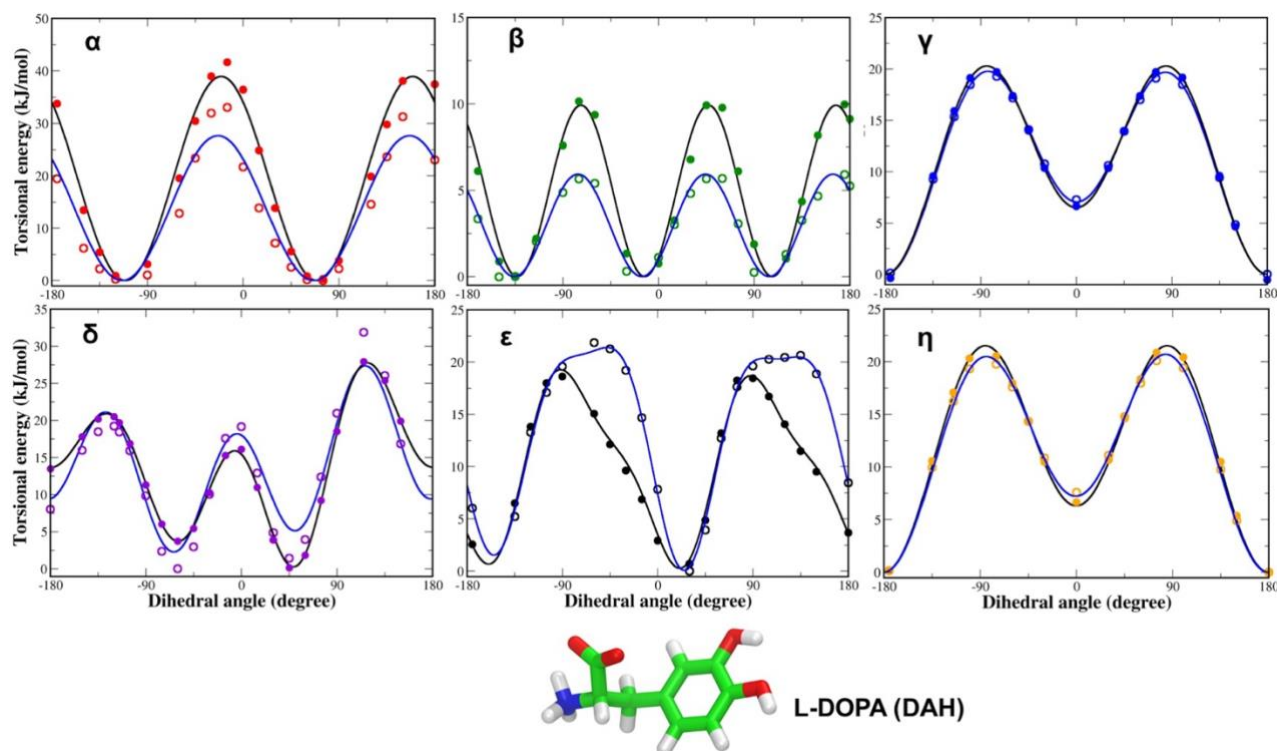

**Figure S14** Comparison of zwitterionic L-DOPA dihedral angles torsional energy profiles from QM (closed circles), JOYCE (black lines), QM after the subtraction of electrostatic and Lennard-Jones energy contributions (open circles) and fittings (blue lines) calculations. Energies are reported in kilojoules per mole (1 kJ/mol = 0.24 kcal/mol).

**Figure S15**

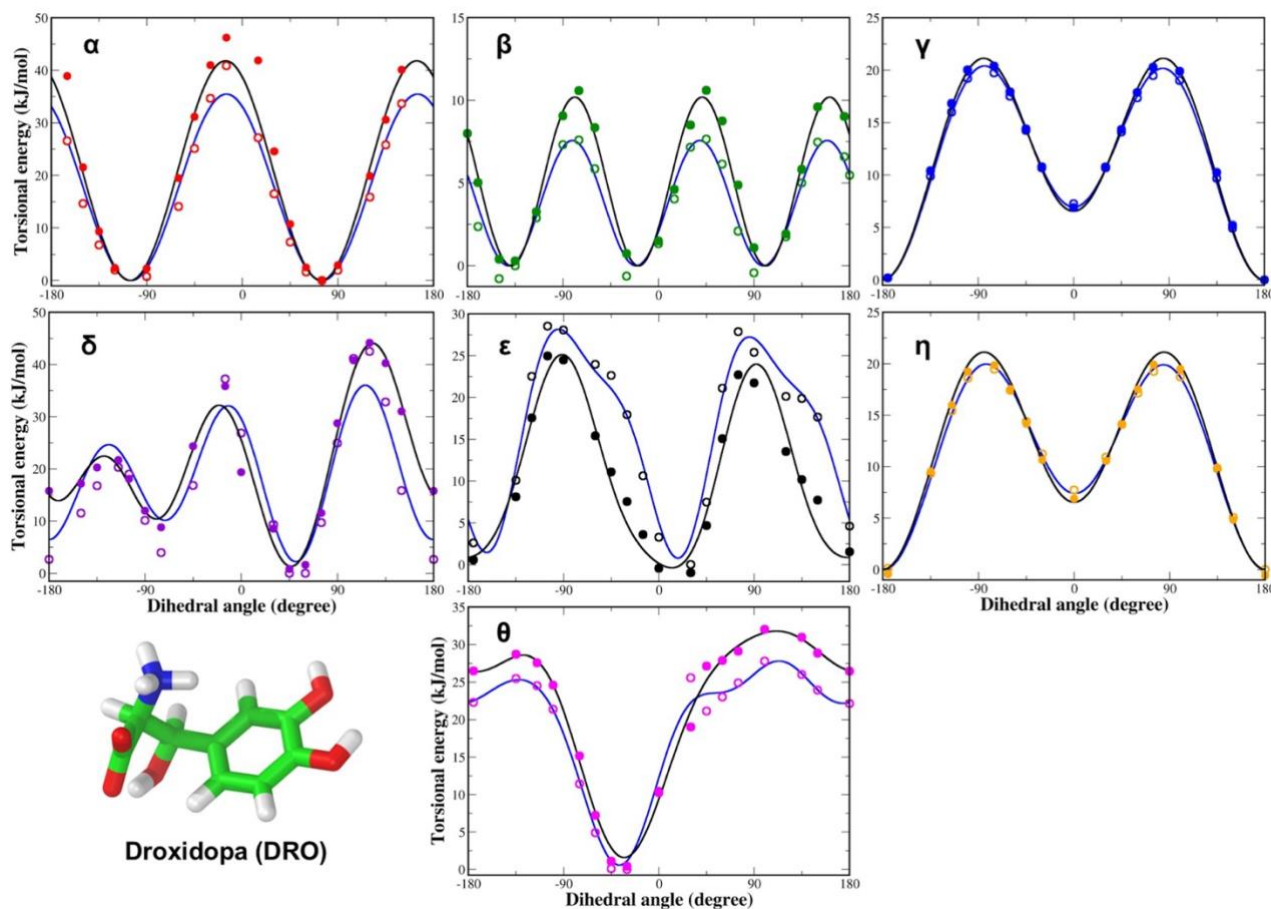

**Figure S15** Comparison of zwitterionic Droxidopa dihedral angles torsional energy profiles from QM (closed circles), JOYCE (black lines), QM after the subtraction of electrostatic and Lennard-Jones energy contributions (open circles) and fittings (blue lines) calculations. Energies are reported in kilojoules per mole (1 kJ/mol = 0.24 kcal/mol).

**Figure S16**

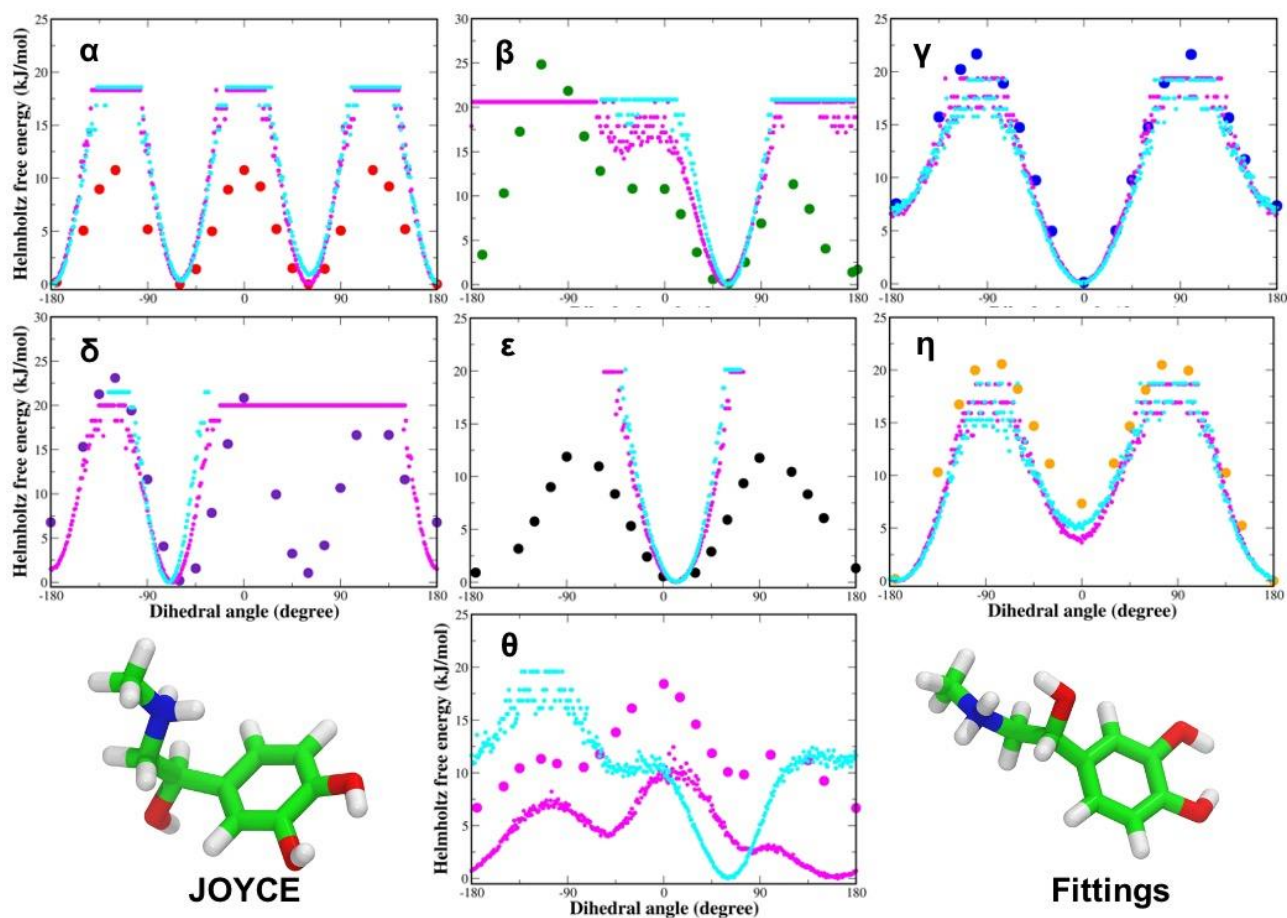

**Figure S16** (Top) Protonated adrenaline QM torsional energy profiles (circles) compared with Helmholtz free energy variations as a function of the dihedral angle, as obtained from MD simulations performed using JOYCE (magenta dots) and OPLS (cyan dots) FFs. (Bottom) 100 ns structures of adrenaline from MD simulations using JOYCE and OPLS (Fittings) FF parameters, respectively. Energies are reported in kilojoules per mole (1 kJ/mol = 0.24 kcal/mol).

**Figure S17**

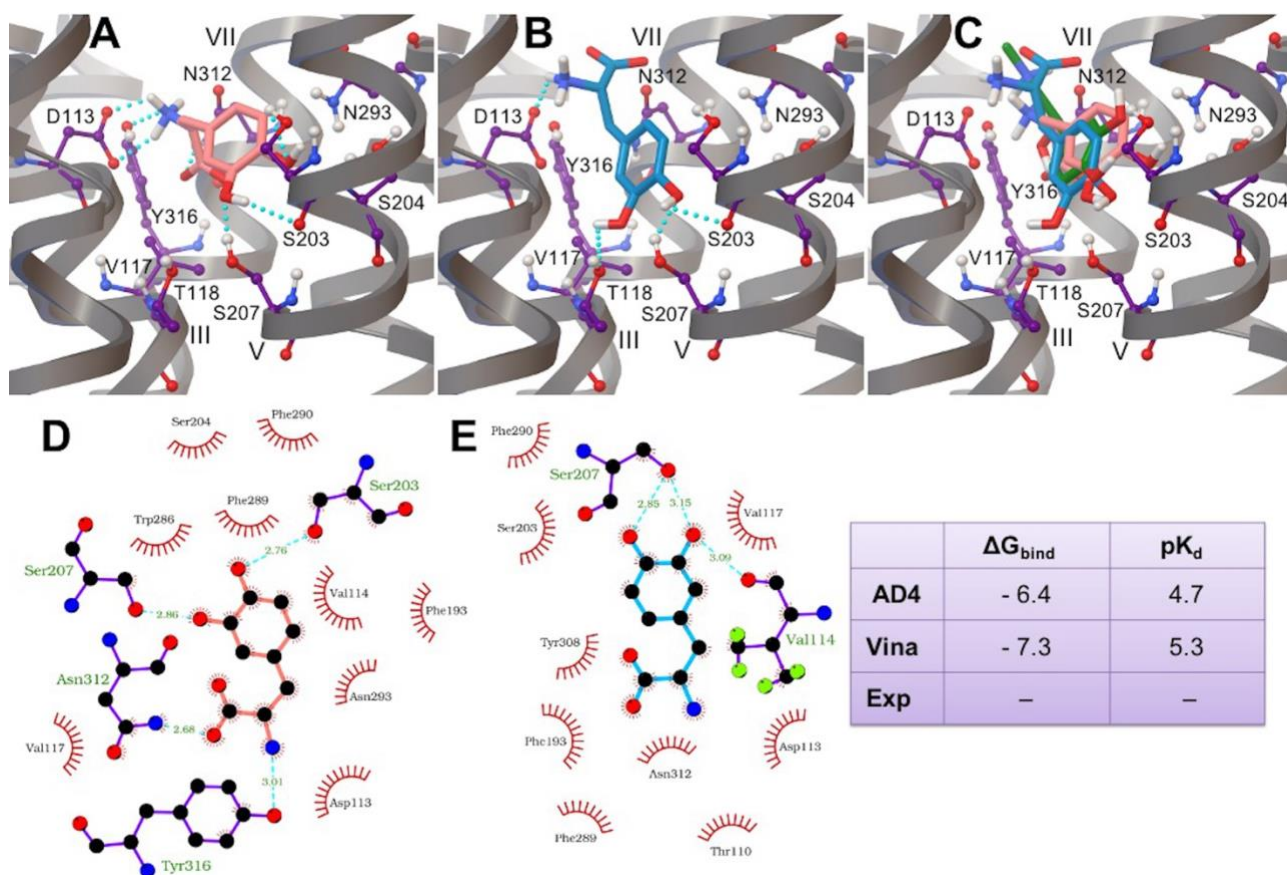

**Figure S17** Lowest energy conformations of L-DOPA obtained from the docking of the ligand into rigid  $\beta_2$ AR models performed with molecular docking software packages AutoDock4.2 and AutoDock Vina are shown in magenta (A, AD4) and skyblue (B, Vina), respectively. (C) Lowest energy poses of L-DOPA are compared to adrenaline's conformation in the X-ray crystal structure (PDB ID: 4LDO, ligand in dark green). Color code and view point as in Figure 9. Hydrogen bond network of L-DOPA lowest energy conformations generated by (D) AD4 and (E) Vina calculations. Free energies of binding (in kcal/mol) and binding affinities estimated by AD4 and Vina calculations are compared to experimental results.

**Figure S18**

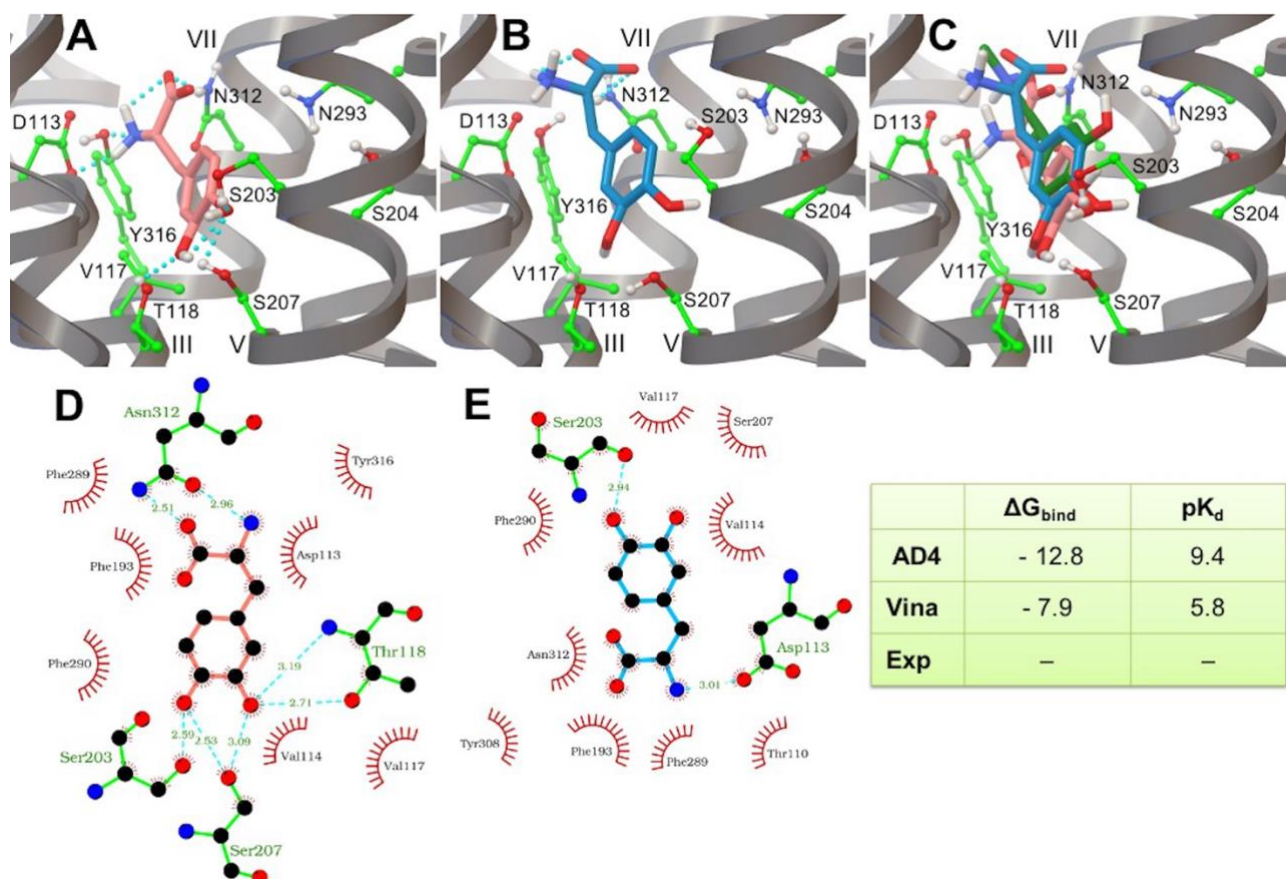

**Figure S18** Lowest energy conformations of L-DOPA obtained from the docking of the ligand into flexible  $\beta_2$ AR models performed with molecular docking software packages AutoDock4.2 and AutoDock Vina are shown in magenta (A, AD4) and skyblue (B, Vina), respectively. (C) Lowest energy poses of L-DOPA are compared to adrenaline's conformation in the X-ray crystal structure (PDB ID: 4LDO, ligand in dark green). Color code and view point as in Figure 9. Hydrogen bond network of L-DOPA lowest energy conformations generated by (D) AD4 and (E) Vina calculations. Free energies of binding (in kcal/mol) and binding affinities estimated by AD4 and Vina calculations are compared to experimental results.

**Figure S19**

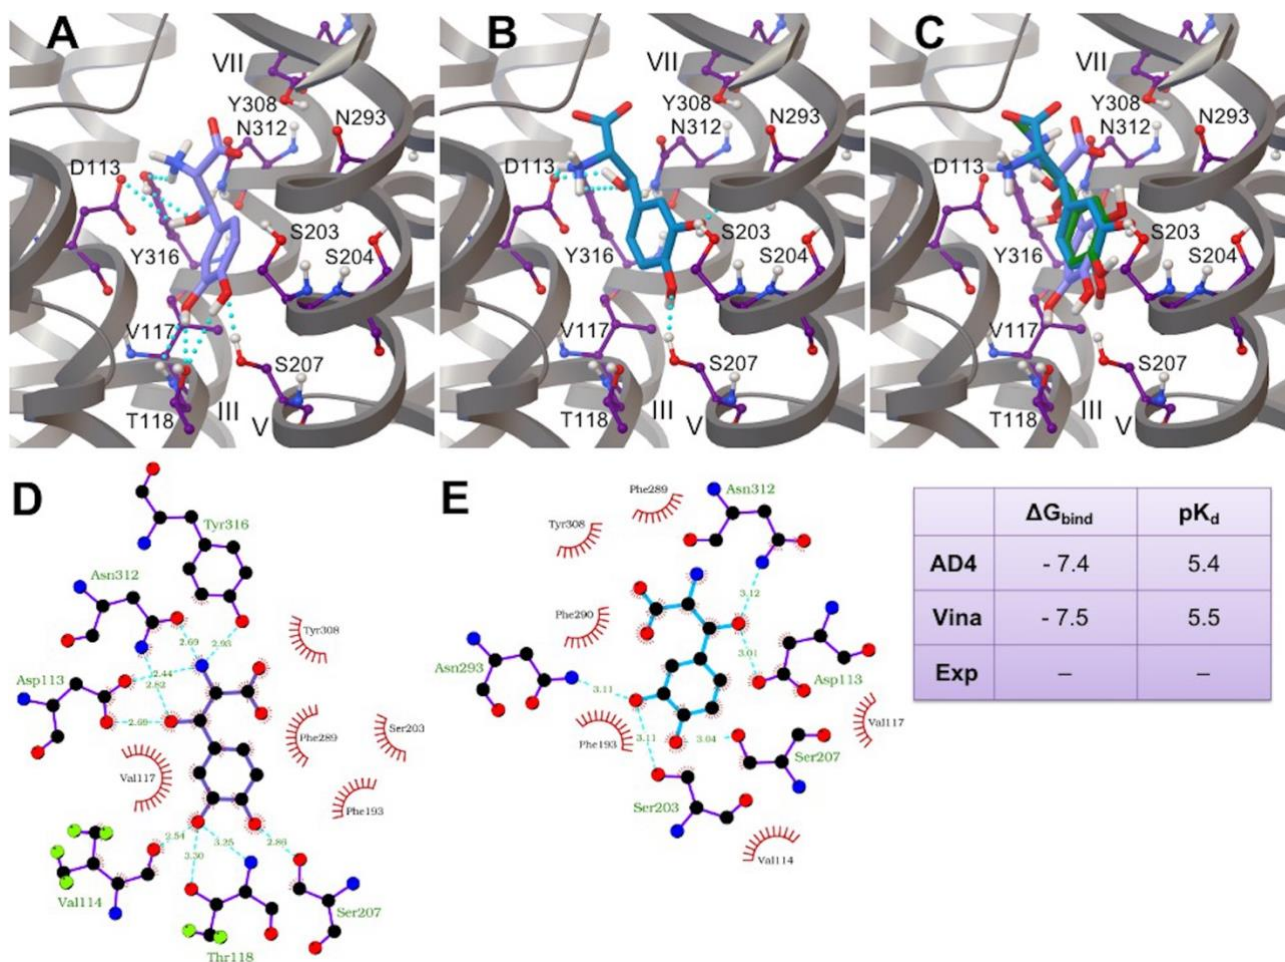

**Figure S19** Lowest energy conformations of Droxidopa obtained from the docking of the ligand into rigid  $\beta_2$ AR models performed with molecular docking software packages AutoDock4.2 and AutoDock Vina are shown in violet (A, AD4) and skyblue (B, Vina), respectively. (C) Lowest energy poses of Droxidopa are compared to adrenaline's conformation in the X-ray crystal structure (PDB ID: 4LDO, ligand in dark green). Color code and view point as in Figure 9. Hydrogen bond network of Droxidopa lowest energy conformations generated by (D) AD4 and (E) Vina calculations. Free energies of binding (in kcal/mol) and binding affinities estimated by AD4 and Vina calculations are compared to experimental results.

**Figure S20**

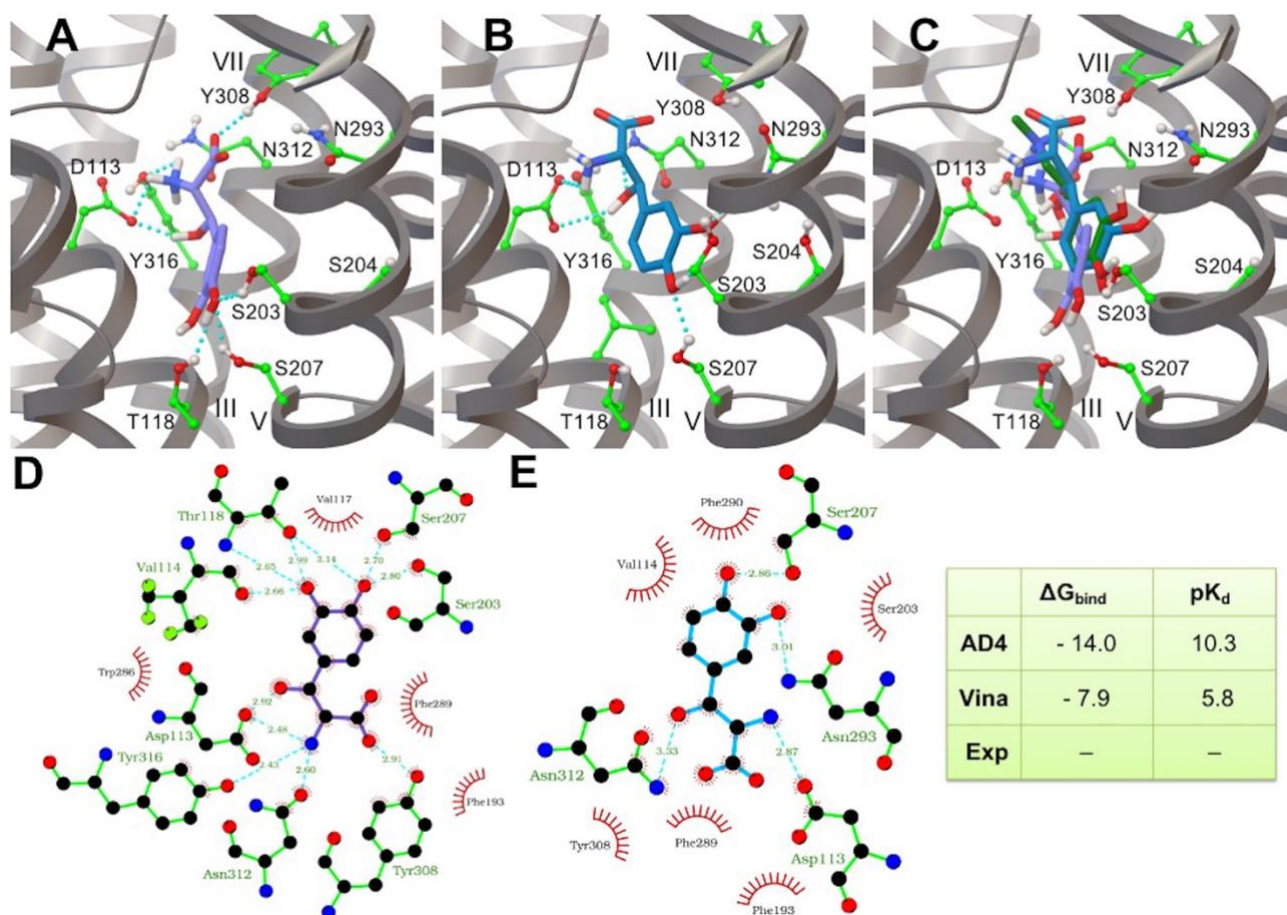

**Figure S20** Lowest energy conformations of Droxidopa obtained from the docking of the ligand into flexible  $\beta_2$ AR models performed with molecular docking software packages AutoDock4.2 and AutoDock Vina are shown in violet (A, AD4) and skyblue (B, Vina), respectively. (C) Lowest energy poses of Droxidopa are compared to adrenaline's conformation in the X-ray crystal structure (PDB ID: 4LDO, ligand in dark green). Color code and view point as in Figure 9. Hydrogen bond network of Droxidopa lowest energy conformations generated by (D) AD4 and (E) Vina calculations. Free energies of binding (in kcal/mol) and binding affinities estimated by AD4 and Vina calculations are compared to experimental results.

**Table S5**

Percentage of hydrogen bond formation for different  $\beta_2$ AR-Ligand complexes from 1  $\mu$ s all atom MD simulations performed with CHARMM and OPLS AA FF parameters. The analysis was performed over the whole trajectory for adrenaline (ALE), L-DOPA (DAH) and Droxidopa (DRO) ligands.

| Hydrogen bonds<br><br>( $\beta_2$ AR-Ligand) | Percentage of H-bond<br>formation (%) |                |      |             |      |      |
|----------------------------------------------|---------------------------------------|----------------|------|-------------|------|------|
|                                              | CHARMM                                |                |      | OPLS        |      |      |
|                                              | ALE                                   | DAH            | DRO  | ALE         | DAH  | DRO  |
| OG (S203) - O (para)                         | 23.6                                  | 28.4           | 11.9 | 12.6        | 3.5  | 7.4  |
| OG (S203) - O (meta)                         | <b>54.3</b>                           | 15.3           | 12.4 | <b>4.4</b>  | 0.3  | 20.7 |
| OG (S204) - O (para)                         | 0.1                                   | 11.4           | 2.4  | 0.6         | 0.3  | 0.8  |
| OG (S204) - O (meta)                         | 1.3                                   | 31.9           | 20.9 | 0           | 0    | 39.9 |
| OG (S207) - O (para)                         | <b>47.9</b>                           | 32.0           | 44.3 | <b>19.3</b> | 21.4 | 7.6  |
| OG (S207) - O (meta)                         | 0                                     | 11.2           | 7.6  | 9.1         | 7.2  | 0.9  |
| ND2 (N293) - O (para)                        | 0                                     | 0              | 0.4  | 3.0         | 0.1  | 0    |
| ND2 (N293) - O (meta)                        | <b>4.1</b>                            | 4.9            | 16.7 | <b>0</b>    | 0    | 13.5 |
| OG1 (T118) - O (para)                        | 1.1                                   | 0.8            | 18.9 | 1.1         | 1.1  | 28.6 |
| OG1 (T118) - O (meta)                        | 0                                     | 3.4            | 4.4  | 25.4        | 4.9  | 0    |
| OD1 (D113) - N (amino)                       | 72.6                                  | 47.3           | 38.6 | 75.7        | 50.9 | 55.0 |
| OD2 (D113) - N (amino)                       | <b>97.7</b>                           | 88.0           | 36.1 | <b>76.3</b> | 52.6 | 55.3 |
| OD1 (D113) - O ( $\beta$ -OH)                | <b>46.6</b>                           | - <sup>a</sup> | 16.9 | <b>59.6</b> | -    | 0    |
| OD2 (D113) - O ( $\beta$ -OH)                | <b>37.0</b>                           | -              | 18.0 | <b>60.9</b> | -    | 0    |
| OH (Y308) - O1 (-COO <sup>-</sup> )          | - - <sup>c</sup>                      | 29.0           | 1.1  | - -         | 0.2  | 1.5  |
| OH (Y308) - O2 (-COO <sup>-</sup> )          | - -                                   | 76.6           | 8.1  | - -         | 0.7  | 0.2  |
| ND2 (N312) - O ( $\beta$ -OH)                | <b>47.9</b>                           | -              | 21.2 | <b>71.7</b> | -    | 18.5 |
| OD1 (N312) - N (amino)                       | <b>66.4</b>                           | 82.8           | 26.6 | <b>87.3</b> | 0.9  | 23.9 |
| ND2 (N312) - O1 (-COO <sup>-</sup> )         | - -                                   | 0              | 0.2  | - -         | 3.8  | 0    |
| ND2 (N312) - O2 (-COO <sup>-</sup> )         | - -                                   | 12.9           | 3.7  | - -         | 2.4  | 0    |
| OH (Y316) - O ( $\beta$ -OH)                 | 0.2                                   | -              | 1.0  | 45.5        | -    | 0    |
| OH (Y316) - N (amino)                        | 0                                     | 3.3            | 0    | 5.0         | 1.8  | 12.0 |

<sup>a</sup> Hydrogen bonds formed by adrenaline's conformation in the  $\beta_2$ AR X-ray crystal structure (PDB ID: 4LDO) are highlighted in bold.

<sup>b</sup>  $\beta$ -OH group is absent in the L-DOPA ligand.

<sup>c</sup> -COO<sup>-</sup> group is absent in the endogenous ligand.

**Figure S21**

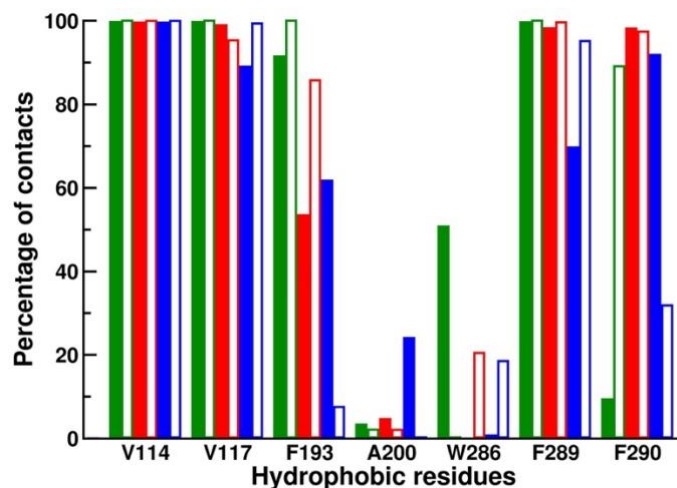

**Figure S21** Percentage of contacts of ligands with the receptor hydrophobic residues extracted from MD simulations of  $\beta_2$ AR-catecholamine complexes performed with CHARMM (closed bars) and OPLS (open bars) AA FFs. Adrenaline, L-DOPA and Droxidopa percentages of contacts with  $\beta_2$ AR hydrophobic residues are shown with green, red and blue bars, respectively. This analysis was performed over the whole 1  $\mu$ s trajectory.

**Figure S22**

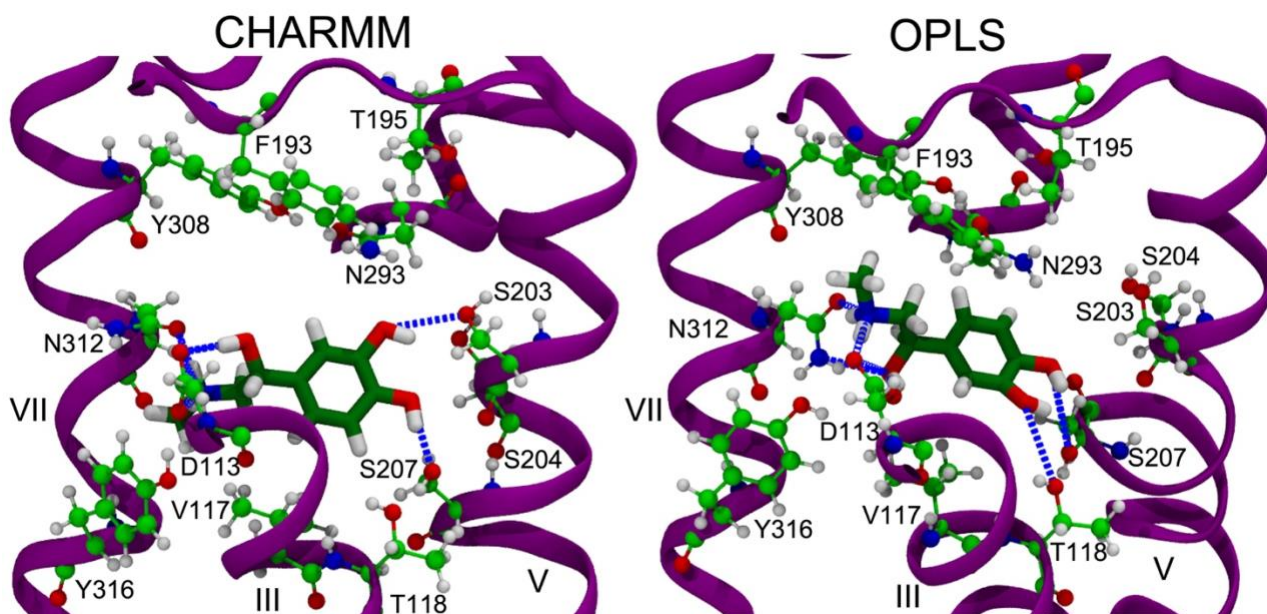

**Figure S22** Snapshots of MD simulations of  $\beta_2$ AR-adrenaline complexes show the hydrogen bond network of the endogenous ligand with key amino acids of the receptor binding pocket using CHARMM and OPLS AA FFs. Hydrogen bonds are highlighted with dashed blue lines. View point and color code as in Figure 5 of Biswas et al. 2021.

**Figure S23**

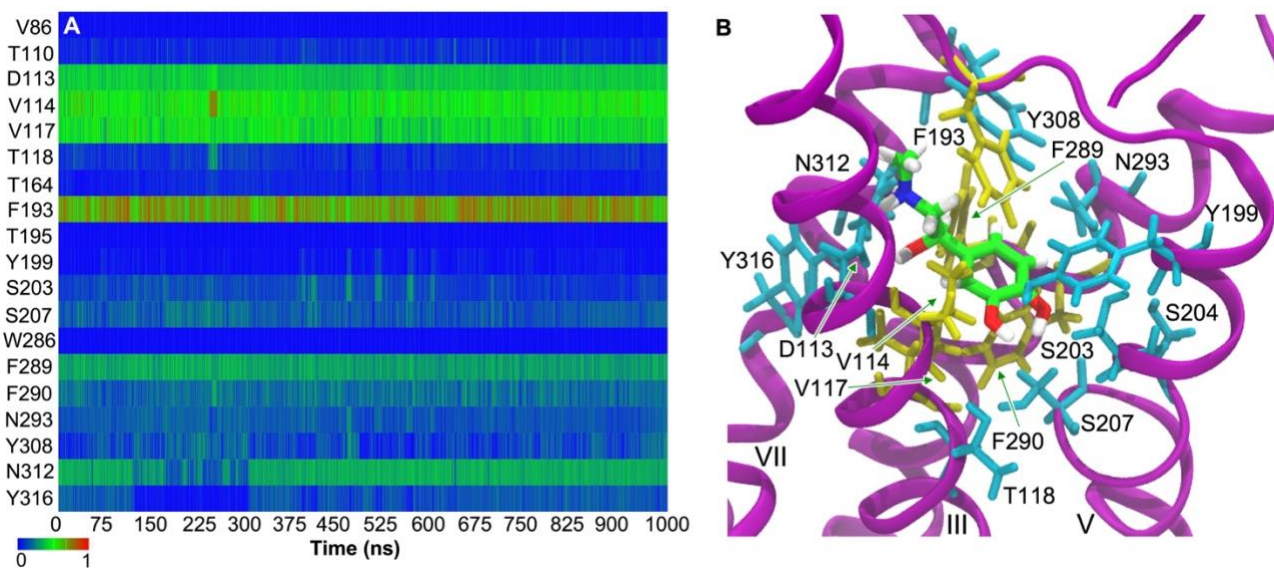

**Figure S23** (A) Normalized number of contacts of adrenaline with the receptor residues extracted from the 1  $\mu$ s all atom MD simulation of the  $\beta_2$ AR-adrenaline complex performed with the OPLS AA FF. (B) A snapshot from the MD simulation shows  $\beta_2$ AR hydrophilic (cyan) and hydrophobic (yellow) residues interacting with the adrenaline ligand. For clarity, only  $\beta_2$ AR residues displaying the largest percentages of contacts with the ligand are shown. Sidechains of some residues are indicated by green arrows. This analysis was performed over the whole 1  $\mu$ s trajectory.

**Figure S24**

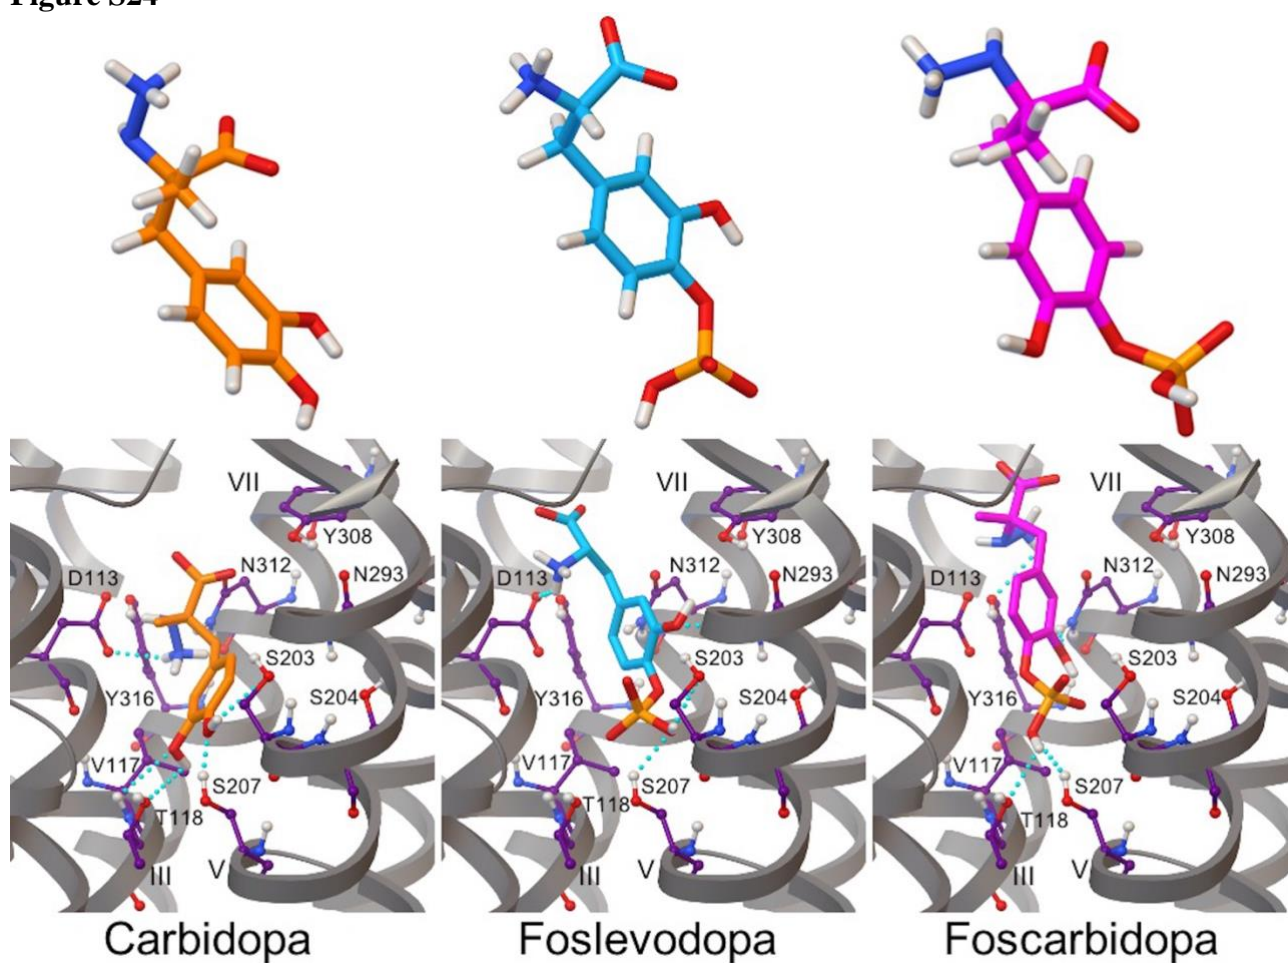

**Figure S24** (top) Chemical structures of protonated Carbidopa (orange), Foslevodopa (celestial blue) and Foscarbidopa (magenta). (bottom) Lowest energy conformations and hydrogen bond network obtained from the docking of each ligand into a rigid  $\beta_2$ AR model performed with the molecular docking software package AutoDock Vina v. 1.2.3. Color code and view point as in Figure 9.

## adrenaline.itp

; OPLS AA force field parameters of Adrenaline generated with JOYCE

[ moleculetype ]

; Name nrexcl

ALE 3

[ atoms ]

; nr type resnr residue atom cgnr charge mass typeB chargeB

; residue 1 ALE rtp ALE q +1.0

|    |           |   |     |     |   |           |         |  |                 |
|----|-----------|---|-----|-----|---|-----------|---------|--|-----------------|
| 1  | oplsm_309 | 1 | ALE | N   | 1 | -0.446343 | 14.0027 |  |                 |
| 2  | oplsm_310 | 1 | ALE | H1  | 1 | 0.382023  | 1.008   |  |                 |
| 3  | oplsm_310 | 1 | ALE | H2  | 1 | 0.363936  | 1.008   |  |                 |
| 4  | oplsm_149 | 1 | ALE | C1  | 1 | -0.076781 | 12.011  |  |                 |
| 5  | oplsm_140 | 1 | ALE | H3  | 1 | 0.137222  | 1.008   |  |                 |
| 6  | oplsm_140 | 1 | ALE | H4  | 1 | 0.135202  | 1.008   |  |                 |
| 7  | oplsm_140 | 1 | ALE | H5  | 1 | 0.135338  | 1.008   |  |                 |
| 8  | oplsm_293 | 1 | ALE | CA  | 1 | -0.024055 | 12.011  |  |                 |
| 9  | oplsm_140 | 1 | ALE | HA1 | 1 | 0.138286  | 1.008   |  |                 |
| 10 | oplsm_140 | 1 | ALE | HA2 | 1 | 0.133064  | 1.008   |  |                 |
| 11 | oplsm_149 | 1 | ALE | CB  | 2 | 0.027731  | 12.011  |  |                 |
| 12 | oplsm_140 | 1 | ALE | HB1 | 2 | 0.117273  | 1.008   |  |                 |
| 13 | oplsm_154 | 1 | ALE | OG  | 3 | -0.422795 | 15.9994 |  |                 |
| 14 | oplsm_155 | 1 | ALE | HG  | 3 | 0.347155  | 1.008   |  |                 |
| 15 | oplsm_145 | 1 | ALE | CG  | 3 | -0.029545 | 12.011  |  |                 |
| 16 | oplsm_145 | 1 | ALE | CD1 | 4 | -0.104846 | 12.011  |  |                 |
| 17 | oplsm_146 | 1 | ALE | HD1 | 4 | 0.107227  | 1.008   |  |                 |
| 18 | oplsm_145 | 1 | ALE | CD2 | 5 | -0.101815 | 12.011  |  |                 |
| 19 | oplsm_146 | 1 | ALE | HD2 | 5 | 0.103567  | 1.008   |  |                 |
| 20 | oplsm_166 | 1 | ALE | CE1 | 6 | 0.073348  | 12.011  |  |                 |
| 21 | oplsm_167 | 1 | ALE | OE1 | 6 | -0.394652 | 15.9994 |  |                 |
| 22 | oplsm_168 | 1 | ALE | HE1 | 6 | 0.340755  | 1.008   |  |                 |
| 23 | oplsm_145 | 1 | ALE | CE2 | 7 | -0.107124 | 12.011  |  |                 |
| 24 | oplsm_146 | 1 | ALE | HE2 | 7 | 0.112182  | 1.008   |  |                 |
| 25 | oplsm_166 | 1 | ALE | CZ  | 8 | 0.071847  | 12.011  |  |                 |
| 26 | oplsm_167 | 1 | ALE | OH  | 8 | -0.381798 | 15.9994 |  |                 |
| 27 | oplsm_168 | 1 | ALE | HH  | 8 | 0.363632  | 1.008   |  | ; qtot 1.000033 |

; Stretchings

[ bonds ]

|    |    |   |        |            |
|----|----|---|--------|------------|
| 1  | 2  | 1 | 0.1025 | 393683.477 |
| 1  | 3  | 1 | 0.1028 | 393683.477 |
| 1  | 4  | 1 | 0.1496 | 196521.091 |
| 4  | 5  | 1 | 0.1094 | 328457.447 |
| 4  | 6  | 1 | 0.1094 | 328457.447 |
| 4  | 7  | 1 | 0.1093 | 328457.447 |
| 1  | 8  | 1 | 0.1501 | 179667.704 |
| 8  | 9  | 1 | 0.1094 | 323493.654 |
| 8  | 10 | 1 | 0.1095 | 323493.654 |
| 8  | 11 | 1 | 0.1524 | 182391.941 |
| 11 | 12 | 1 | 0.1102 | 301357.367 |
| 11 | 13 | 1 | 0.1436 | 199950.220 |
| 13 | 14 | 1 | 0.0966 | 486572.973 |
| 11 | 15 | 1 | 0.1512 | 205697.663 |
| 15 | 16 | 1 | 0.1403 | 339484.191 |
| 16 | 17 | 1 | 0.1090 | 332540.269 |
| 15 | 18 | 1 | 0.1397 | 339484.191 |
| 18 | 19 | 1 | 0.1091 | 332540.269 |
| 16 | 20 | 1 | 0.1391 | 339484.191 |

|    |    |   |        |            |
|----|----|---|--------|------------|
| 20 | 21 | 1 | 0.1368 | 307423.405 |
| 21 | 22 | 1 | 0.0969 | 480865.258 |
| 18 | 23 | 1 | 0.1400 | 339484.191 |
| 23 | 24 | 1 | 0.1091 | 332540.269 |
| 20 | 25 | 1 | 0.1408 | 311404.166 |
| 23 | 25 | 1 | 0.1393 | 311404.166 |
| 25 | 26 | 1 | 0.1372 | 306132.262 |
| 26 | 27 | 1 | 0.0966 | 480865.258 |

; Bendings

[ angles ]

|    |    |    |   |        |          |
|----|----|----|---|--------|----------|
| 2  | 1  | 3  | 1 | 105.80 | 366.8740 |
| 2  | 1  | 4  | 1 | 109.51 | 373.8285 |
| 2  | 1  | 8  | 1 | 109.42 | 381.2262 |
| 3  | 1  | 4  | 1 | 110.55 | 373.8285 |
| 3  | 1  | 8  | 1 | 106.93 | 381.2262 |
| 1  | 4  | 5  | 1 | 108.48 | 468.3697 |
| 1  | 4  | 6  | 1 | 108.40 | 468.3697 |
| 1  | 4  | 7  | 1 | 108.25 | 468.3697 |
| 4  | 1  | 8  | 1 | 114.27 | 472.0079 |
| 5  | 4  | 6  | 1 | 110.52 | 309.0556 |
| 5  | 4  | 7  | 1 | 110.50 | 309.0556 |
| 6  | 4  | 7  | 1 | 110.60 | 309.0556 |
| 1  | 8  | 9  | 1 | 108.31 | 451.2013 |
| 1  | 8  | 10 | 1 | 106.94 | 451.2013 |
| 1  | 8  | 11 | 1 | 109.59 | 643.5652 |
| 9  | 8  | 10 | 1 | 109.67 | 292.8912 |
| 9  | 8  | 11 | 1 | 111.50 | 292.9588 |
| 10 | 8  | 11 | 1 | 110.69 | 292.9588 |
| 8  | 11 | 12 | 1 | 109.16 | 383.0963 |
| 8  | 11 | 13 | 1 | 104.55 | 660.4204 |
| 8  | 11 | 15 | 1 | 110.97 | 474.4008 |
| 12 | 11 | 13 | 1 | 109.73 | 388.2702 |
| 12 | 11 | 15 | 1 | 108.71 | 325.9046 |
| 11 | 13 | 14 | 1 | 108.97 | 469.7023 |
| 13 | 11 | 15 | 1 | 113.61 | 557.7615 |
| 11 | 15 | 16 | 1 | 120.12 | 588.9987 |
| 11 | 15 | 18 | 1 | 120.26 | 588.9987 |
| 15 | 16 | 17 | 1 | 120.97 | 293.3534 |
| 16 | 15 | 18 | 1 | 119.62 | 495.6412 |
| 15 | 16 | 20 | 1 | 120.20 | 495.6412 |
| 17 | 16 | 20 | 1 | 118.83 | 293.3534 |
| 15 | 18 | 19 | 1 | 120.08 | 293.3534 |
| 15 | 18 | 23 | 1 | 120.43 | 495.6412 |
| 19 | 18 | 23 | 1 | 119.49 | 293.3534 |
| 16 | 20 | 21 | 1 | 119.58 | 534.1722 |
| 16 | 20 | 25 | 1 | 119.91 | 361.9651 |
| 20 | 21 | 22 | 1 | 108.56 | 522.9635 |
| 21 | 20 | 25 | 1 | 120.51 | 771.4094 |
| 18 | 23 | 24 | 1 | 120.43 | 293.3534 |
| 18 | 23 | 25 | 1 | 119.76 | 361.9651 |
| 24 | 23 | 25 | 1 | 119.80 | 320.3130 |
| 20 | 25 | 23 | 1 | 120.09 | 115.1701 |
| 20 | 25 | 26 | 1 | 115.22 | 699.2490 |
| 23 | 25 | 26 | 1 | 124.69 | 699.2490 |
| 25 | 26 | 27 | 1 | 110.64 | 448.1807 |

; Torsions - Proper dihedral angles

[ dihedrals ]

|      |    |    |    |       |    |    |    |    |    |    |
|------|----|----|----|-------|----|----|----|----|----|----|
| ; ai | aj | ak | al | funct | c0 | c1 | c2 | c3 | c4 | c5 |
|------|----|----|----|-------|----|----|----|----|----|----|

|    |    |    |    |   |         |       |   |
|----|----|----|----|---|---------|-------|---|
| 3  | 1  | 4  | 6  | 1 | 1.11    | 5.300 | 3 |
| 3  | 1  | 4  | 7  | 1 | 1.11    | 5.300 | 3 |
| 2  | 1  | 8  | 9  | 1 | 270.19  | 5.179 | 1 |
| 2  | 1  | 8  | 9  | 1 | -171.66 | 2.193 | 2 |
| 2  | 1  | 8  | 9  | 1 | 1.25    | 3.196 | 3 |
| 2  | 1  | 8  | 10 | 1 | 270.19  | 5.179 | 1 |
| 2  | 1  | 8  | 10 | 1 | -171.66 | 2.193 | 2 |
| 2  | 1  | 8  | 10 | 1 | 1.25    | 3.196 | 3 |
| 20 | 25 | 26 | 27 | 1 | -179.55 | 3.882 | 1 |
| 20 | 25 | 26 | 27 | 1 | 179.73  | 8.726 | 2 |
| 9  | 8  | 11 | 12 | 1 | -162.12 | 2.055 | 1 |
| 9  | 8  | 11 | 12 | 1 | 63.42   | 1.109 | 2 |
| 9  | 8  | 11 | 12 | 1 | -0.25   | 8.553 | 3 |
| 9  | 8  | 11 | 12 | 1 | -6.16   | 0.163 | 4 |
| 12 | 11 | 15 | 18 | 1 | 180.84  | 0.004 | 1 |
| 12 | 11 | 15 | 18 | 1 | -152.83 | 5.737 | 2 |
| 12 | 11 | 15 | 18 | 1 | 161.46  | 0.004 | 3 |
| 12 | 11 | 15 | 18 | 1 | 17.84   | 0.217 | 4 |
| 12 | 11 | 15 | 16 | 1 | 180.84  | 0.004 | 1 |
| 12 | 11 | 15 | 16 | 1 | -152.83 | 5.737 | 2 |
| 12 | 11 | 15 | 16 | 1 | 161.46  | 0.004 | 3 |
| 12 | 11 | 15 | 16 | 1 | 17.84   | 0.217 | 4 |
| 16 | 20 | 21 | 22 | 1 | -0.56   | 3.524 | 1 |
| 16 | 20 | 21 | 22 | 1 | 180.05  | 8.762 | 2 |
| 8  | 11 | 13 | 14 | 1 | 22.00   | 9.094 | 1 |
| 8  | 11 | 13 | 14 | 1 | 70.38   | 1.057 | 2 |
| 8  | 11 | 13 | 14 | 1 | 73.83   | 1.153 | 2 |
| 8  | 11 | 13 | 14 | 1 | -4.18   | 0.700 | 3 |

; Nonbonded terms

[ pairs ]

; 1-4 interactions

|    |    |   |       |        |        |        |         |   |    |   |    |
|----|----|---|-------|--------|--------|--------|---------|---|----|---|----|
| 1  | 12 | 2 | 0.500 | -0.446 | 0.117  | 0.2875 | 0.14940 | # | N  | - | HA |
| 1  | 13 | 2 | 0.500 | -0.446 | -0.423 | 0.3160 | 0.35564 | # | N  | - | OH |
| 1  | 15 | 2 | 0.500 | -0.446 | -0.030 | 0.3400 | 0.22821 | # | N  | - | CC |
| 2  | 5  | 2 | 0.500 | 0.382  | 0.137  | 0.1250 | 0.00000 | # | H  | - | HA |
| 2  | 6  | 2 | 0.500 | 0.382  | 0.135  | 0.1250 | 0.00000 | # | H  | - | HA |
| 2  | 7  | 2 | 0.500 | 0.382  | 0.135  | 0.1250 | 0.00000 | # | H  | - | HA |
| 2  | 9  | 2 | 0.500 | 0.382  | 0.138  | 0.1250 | 0.00000 | # | H  | - | HA |
| 2  | 10 | 2 | 0.500 | 0.382  | 0.133  | 0.1250 | 0.00000 | # | H  | - | HA |
| 2  | 11 | 2 | 0.500 | 0.382  | 0.028  | 0.1750 | 0.00000 | # | H  | - | CB |
| 3  | 5  | 2 | 0.500 | 0.364  | 0.137  | 0.1250 | 0.00000 | # | H  | - | HA |
| 3  | 6  | 2 | 0.500 | 0.364  | 0.135  | 0.1250 | 0.00000 | # | H  | - | HA |
| 3  | 7  | 2 | 0.500 | 0.364  | 0.135  | 0.1250 | 0.00000 | # | H  | - | HA |
| 3  | 9  | 2 | 0.500 | 0.364  | 0.138  | 0.1250 | 0.00000 | # | H  | - | HA |
| 3  | 10 | 2 | 0.500 | 0.364  | 0.133  | 0.1250 | 0.00000 | # | H  | - | HA |
| 3  | 11 | 2 | 0.500 | 0.364  | 0.028  | 0.1750 | 0.00000 | # | H  | - | CB |
| 4  | 9  | 2 | 0.500 | -0.077 | 0.138  | 0.3125 | 0.11741 | # | C  | - | HA |
| 4  | 10 | 2 | 0.500 | -0.077 | 0.133  | 0.3125 | 0.11741 | # | C  | - | HA |
| 4  | 11 | 2 | 0.500 | -0.077 | 0.028  | 0.3625 | 0.17415 | # | C  | - | CB |
| 5  | 8  | 2 | 0.500 | 0.137  | -0.024 | 0.3000 | 0.09309 | # | HA | - | CA |
| 6  | 8  | 2 | 0.500 | 0.135  | -0.024 | 0.3000 | 0.09309 | # | HA | - | CA |
| 7  | 8  | 2 | 0.500 | 0.135  | -0.024 | 0.3000 | 0.09309 | # | HA | - | CA |
| 8  | 14 | 2 | 0.500 | -0.024 | 0.347  | 0.1750 | 0.00000 | # | CA | - | HO |
| 8  | 16 | 2 | 0.500 | -0.024 | -0.105 | 0.3525 | 0.14219 | # | CA | - | CC |
| 8  | 18 | 2 | 0.500 | -0.024 | -0.102 | 0.3525 | 0.14219 | # | CA | - | CC |
| 9  | 12 | 2 | 0.500 | 0.138  | 0.117  | 0.2500 | 0.06276 | # | HA | - | HA |
| 9  | 13 | 2 | 0.500 | 0.138  | -0.423 | 0.2785 | 0.14940 | # | HA | - | OH |
| 9  | 15 | 2 | 0.500 | 0.138  | -0.030 | 0.3025 | 0.09587 | # | HA | - | CC |
| 10 | 12 | 2 | 0.500 | 0.133  | 0.117  | 0.2500 | 0.06276 | # | HA | - | HA |

|    |    |   |       |        |        |        |         |   |    |   |    |
|----|----|---|-------|--------|--------|--------|---------|---|----|---|----|
| 10 | 13 | 2 | 0.500 | 0.133  | -0.423 | 0.2785 | 0.14940 | # | HA | - | OH |
| 10 | 15 | 2 | 0.500 | 0.133  | -0.030 | 0.3025 | 0.09587 | # | HA | - | CC |
| 11 | 17 | 2 | 0.500 | 0.028  | 0.107  | 0.2960 | 0.09309 | # | CB | - | HC |
| 11 | 19 | 2 | 0.500 | 0.028  | 0.104  | 0.2960 | 0.09309 | # | CB | - | HC |
| 11 | 20 | 2 | 0.500 | 0.028  | 0.073  | 0.3525 | 0.14219 | # | CB | - | CC |
| 11 | 23 | 2 | 0.500 | 0.028  | -0.107 | 0.3525 | 0.14219 | # | CB | - | CC |
| 12 | 14 | 2 | 0.500 | 0.117  | 0.347  | 0.1250 | 0.00000 | # | HA | - | HO |
| 12 | 16 | 2 | 0.500 | 0.117  | -0.105 | 0.3025 | 0.09587 | # | HA | - | CC |
| 12 | 18 | 2 | 0.500 | 0.117  | -0.102 | 0.3025 | 0.09587 | # | HA | - | CC |
| 13 | 16 | 2 | 0.500 | -0.423 | -0.105 | 0.3310 | 0.22821 | # | OH | - | CC |
| 13 | 18 | 2 | 0.500 | -0.423 | -0.102 | 0.3310 | 0.22821 | # | OH | - | CC |
| 14 | 15 | 2 | 0.500 | 0.347  | -0.030 | 0.1775 | 0.00000 | # | HO | - | CC |
| 15 | 21 | 2 | 0.500 | -0.030 | -0.395 | 0.3310 | 0.22821 | # | CC | - | OH |
| 15 | 24 | 2 | 0.500 | -0.030 | 0.112  | 0.2985 | 0.09587 | # | CC | - | HC |
| 15 | 25 | 2 | 0.500 | -0.030 | 0.072  | 0.3550 | 0.14644 | # | CC | - | CZ |
| 16 | 19 | 2 | 0.500 | -0.105 | 0.104  | 0.2985 | 0.09587 | # | CC | - | HC |
| 16 | 22 | 2 | 0.500 | -0.105 | 0.341  | 0.1775 | 0.00000 | # | CC | - | HH |
| 16 | 23 | 2 | 0.500 | -0.105 | -0.107 | 0.3550 | 0.14644 | # | CC | - | CC |
| 16 | 26 | 2 | 0.500 | -0.105 | -0.382 | 0.3310 | 0.22821 | # | CC | - | OH |
| 17 | 18 | 2 | 0.500 | 0.107  | -0.102 | 0.2985 | 0.09587 | # | HC | - | CC |
| 17 | 21 | 2 | 0.500 | 0.107  | -0.395 | 0.2745 | 0.14940 | # | HC | - | OH |
| 17 | 25 | 2 | 0.500 | 0.107  | 0.072  | 0.2985 | 0.09587 | # | HC | - | CZ |
| 18 | 20 | 2 | 0.500 | -0.102 | 0.073  | 0.3550 | 0.14644 | # | CC | - | CC |
| 18 | 26 | 2 | 0.500 | -0.102 | -0.382 | 0.3310 | 0.22821 | # | CC | - | OH |
| 19 | 24 | 2 | 0.500 | 0.104  | 0.112  | 0.2420 | 0.06276 | # | HC | - | HC |
| 19 | 25 | 2 | 0.500 | 0.104  | 0.072  | 0.2985 | 0.09587 | # | HC | - | CZ |
| 20 | 24 | 2 | 0.500 | 0.073  | 0.112  | 0.2985 | 0.09587 | # | CC | - | HC |
| 20 | 27 | 2 | 0.500 | 0.073  | 0.364  | 0.1775 | 0.00000 | # | CC | - | HH |
| 21 | 23 | 2 | 0.500 | -0.395 | -0.107 | 0.3310 | 0.22821 | # | OH | - | CC |
| 21 | 26 | 2 | 0.500 | -0.395 | -0.382 | 0.3070 | 0.35564 | # | OH | - | OH |
| 22 | 25 | 2 | 0.500 | 0.341  | 0.072  | 0.1775 | 0.00000 | # | HH | - | CZ |
| 23 | 27 | 2 | 0.500 | -0.107 | 0.364  | 0.1775 | 0.00000 | # | CC | - | HH |
| 24 | 26 | 2 | 0.500 | 0.112  | -0.382 | 0.2745 | 0.14940 | # | HC | - | OH |
| 1  | 14 | 2 | 0.500 | -0.446 | 0.347  | 0.1625 | 0.00000 | # | N  | - | HO |
| 1  | 16 | 2 | 0.500 | -0.446 | -0.105 | 0.3400 | 0.45642 | # | N  | - | CC |
| 1  | 17 | 2 | 0.500 | -0.446 | 0.107  | 0.2835 | 0.29880 | # | N  | - | HC |
| 1  | 18 | 2 | 0.500 | -0.446 | -0.102 | 0.3400 | 0.45642 | # | N  | - | CC |
| 1  | 19 | 2 | 0.500 | -0.446 | 0.104  | 0.2835 | 0.29880 | # | N  | - | HC |
| 1  | 20 | 2 | 0.500 | -0.446 | 0.073  | 0.3400 | 0.45642 | # | N  | - | CC |
| 1  | 21 | 2 | 0.500 | -0.446 | -0.395 | 0.3160 | 0.71128 | # | N  | - | OH |
| 1  | 22 | 2 | 0.500 | -0.446 | 0.341  | 0.1625 | 0.00000 | # | N  | - | HH |
| 1  | 23 | 2 | 0.500 | -0.446 | -0.107 | 0.3400 | 0.45642 | # | N  | - | CC |
| 1  | 24 | 2 | 0.500 | -0.446 | 0.112  | 0.2835 | 0.29880 | # | N  | - | HC |
| 1  | 25 | 2 | 0.500 | -0.446 | 0.072  | 0.3400 | 0.45642 | # | N  | - | CZ |
| 1  | 26 | 2 | 0.500 | -0.446 | -0.382 | 0.3160 | 0.71128 | # | N  | - | OH |
| 1  | 27 | 2 | 0.500 | -0.446 | 0.364  | 0.1625 | 0.00000 | # | N  | - | HH |
| 2  | 12 | 2 | 0.500 | 0.382  | 0.117  | 0.1250 | 0.00000 | # | H  | - | HA |
| 2  | 13 | 2 | 0.500 | 0.382  | -0.423 | 0.1535 | 0.00000 | # | H  | - | OH |
| 2  | 14 | 2 | 0.500 | 0.382  | 0.347  | 0.0000 | 0.00000 | # | H  | - | HO |
| 2  | 15 | 2 | 0.500 | 0.382  | -0.030 | 0.1775 | 0.00000 | # | H  | - | CC |
| 2  | 16 | 2 | 0.500 | 0.382  | -0.105 | 0.1775 | 0.00000 | # | H  | - | CC |
| 2  | 17 | 2 | 0.500 | 0.382  | 0.107  | 0.1210 | 0.00000 | # | H  | - | HC |
| 2  | 18 | 2 | 0.500 | 0.382  | -0.102 | 0.1775 | 0.00000 | # | H  | - | CC |
| 2  | 19 | 2 | 0.500 | 0.382  | 0.104  | 0.1210 | 0.00000 | # | H  | - | HC |
| 2  | 20 | 2 | 0.500 | 0.382  | 0.073  | 0.1775 | 0.00000 | # | H  | - | CC |
| 2  | 21 | 2 | 0.500 | 0.382  | -0.395 | 0.1535 | 0.00000 | # | H  | - | OH |
| 2  | 22 | 2 | 0.500 | 0.382  | 0.341  | 0.0000 | 0.00000 | # | H  | - | HH |
| 2  | 23 | 2 | 0.500 | 0.382  | -0.107 | 0.1775 | 0.00000 | # | H  | - | CC |
| 2  | 24 | 2 | 0.500 | 0.382  | 0.112  | 0.1210 | 0.00000 | # | H  | - | HC |
| 2  | 25 | 2 | 0.500 | 0.382  | 0.072  | 0.1775 | 0.00000 | # | H  | - | CZ |

|   |    |   |       |        |        |        |         |   |    |      |
|---|----|---|-------|--------|--------|--------|---------|---|----|------|
| 2 | 26 | 2 | 0.500 | 0.382  | -0.382 | 0.1535 | 0.00000 | # | H  | - OH |
| 2 | 27 | 2 | 0.500 | 0.382  | 0.364  | 0.0000 | 0.00000 | # | H  | - HH |
| 3 | 12 | 2 | 0.500 | 0.364  | 0.117  | 0.1250 | 0.00000 | # | H  | - HA |
| 3 | 13 | 2 | 0.500 | 0.364  | -0.423 | 0.1535 | 0.00000 | # | H  | - OH |
| 3 | 14 | 2 | 0.500 | 0.364  | 0.347  | 0.0000 | 0.00000 | # | H  | - HO |
| 3 | 15 | 2 | 0.500 | 0.364  | -0.030 | 0.1775 | 0.00000 | # | H  | - CC |
| 3 | 16 | 2 | 0.500 | 0.364  | -0.105 | 0.1775 | 0.00000 | # | H  | - CC |
| 3 | 17 | 2 | 0.500 | 0.364  | 0.107  | 0.1210 | 0.00000 | # | H  | - HC |
| 3 | 18 | 2 | 0.500 | 0.364  | -0.102 | 0.1775 | 0.00000 | # | H  | - CC |
| 3 | 19 | 2 | 0.500 | 0.364  | 0.104  | 0.1210 | 0.00000 | # | H  | - HC |
| 3 | 20 | 2 | 0.500 | 0.364  | 0.073  | 0.1775 | 0.00000 | # | H  | - CC |
| 3 | 21 | 2 | 0.500 | 0.364  | -0.395 | 0.1535 | 0.00000 | # | H  | - OH |
| 3 | 22 | 2 | 0.500 | 0.364  | 0.341  | 0.0000 | 0.00000 | # | H  | - HH |
| 3 | 23 | 2 | 0.500 | 0.364  | -0.107 | 0.1775 | 0.00000 | # | H  | - CC |
| 3 | 24 | 2 | 0.500 | 0.364  | 0.112  | 0.1210 | 0.00000 | # | H  | - HC |
| 3 | 25 | 2 | 0.500 | 0.364  | 0.072  | 0.1775 | 0.00000 | # | H  | - CZ |
| 3 | 26 | 2 | 0.500 | 0.364  | -0.382 | 0.1535 | 0.00000 | # | H  | - OH |
| 3 | 27 | 2 | 0.500 | 0.364  | 0.364  | 0.0000 | 0.00000 | # | H  | - HH |
| 4 | 12 | 2 | 0.500 | -0.077 | 0.117  | 0.3125 | 0.23483 | # | C  | - HA |
| 4 | 13 | 2 | 0.500 | -0.077 | -0.423 | 0.3410 | 0.55900 | # | C  | - OH |
| 4 | 14 | 2 | 0.500 | -0.077 | 0.347  | 0.1875 | 0.00000 | # | C  | - HO |
| 4 | 15 | 2 | 0.500 | -0.077 | -0.030 | 0.3650 | 0.35870 | # | C  | - CC |
| 4 | 16 | 2 | 0.500 | -0.077 | -0.105 | 0.3650 | 0.35870 | # | C  | - CC |
| 4 | 17 | 2 | 0.500 | -0.077 | 0.107  | 0.3085 | 0.23483 | # | C  | - HC |
| 4 | 18 | 2 | 0.500 | -0.077 | -0.102 | 0.3650 | 0.35870 | # | C  | - CC |
| 4 | 19 | 2 | 0.500 | -0.077 | 0.104  | 0.3085 | 0.23483 | # | C  | - HC |
| 4 | 20 | 2 | 0.500 | -0.077 | 0.073  | 0.3650 | 0.35870 | # | C  | - CC |
| 4 | 21 | 2 | 0.500 | -0.077 | -0.395 | 0.3410 | 0.55900 | # | C  | - OH |
| 4 | 22 | 2 | 0.500 | -0.077 | 0.341  | 0.1875 | 0.00000 | # | C  | - HH |
| 4 | 23 | 2 | 0.500 | -0.077 | -0.107 | 0.3650 | 0.35870 | # | C  | - CC |
| 4 | 24 | 2 | 0.500 | -0.077 | 0.112  | 0.3085 | 0.23483 | # | C  | - HC |
| 4 | 25 | 2 | 0.500 | -0.077 | 0.072  | 0.3650 | 0.35870 | # | C  | - CZ |
| 4 | 26 | 2 | 0.500 | -0.077 | -0.382 | 0.3410 | 0.55900 | # | C  | - OH |
| 4 | 27 | 2 | 0.500 | -0.077 | 0.364  | 0.1875 | 0.00000 | # | C  | - HH |
| 5 | 9  | 2 | 0.500 | 0.137  | 0.138  | 0.2500 | 0.12552 | # | HA | - HA |
| 5 | 10 | 2 | 0.500 | 0.137  | 0.133  | 0.2500 | 0.12552 | # | HA | - HA |
| 5 | 11 | 2 | 0.500 | 0.137  | 0.028  | 0.3000 | 0.18618 | # | HA | - CB |
| 5 | 12 | 2 | 0.500 | 0.137  | 0.117  | 0.2500 | 0.12552 | # | HA | - HA |
| 5 | 13 | 2 | 0.500 | 0.137  | -0.423 | 0.2785 | 0.29880 | # | HA | - OH |
| 5 | 14 | 2 | 0.500 | 0.137  | 0.347  | 0.1250 | 0.00000 | # | HA | - HO |
| 5 | 15 | 2 | 0.500 | 0.137  | -0.030 | 0.3025 | 0.19173 | # | HA | - CC |
| 5 | 16 | 2 | 0.500 | 0.137  | -0.105 | 0.3025 | 0.19173 | # | HA | - CC |
| 5 | 17 | 2 | 0.500 | 0.137  | 0.107  | 0.2460 | 0.12552 | # | HA | - HC |
| 5 | 18 | 2 | 0.500 | 0.137  | -0.102 | 0.3025 | 0.19173 | # | HA | - CC |
| 5 | 19 | 2 | 0.500 | 0.137  | 0.104  | 0.2460 | 0.12552 | # | HA | - HC |
| 5 | 20 | 2 | 0.500 | 0.137  | 0.073  | 0.3025 | 0.19173 | # | HA | - CC |
| 5 | 21 | 2 | 0.500 | 0.137  | -0.395 | 0.2785 | 0.29880 | # | HA | - OH |
| 5 | 22 | 2 | 0.500 | 0.137  | 0.341  | 0.1250 | 0.00000 | # | HA | - HH |
| 5 | 23 | 2 | 0.500 | 0.137  | -0.107 | 0.3025 | 0.19173 | # | HA | - CC |
| 5 | 24 | 2 | 0.500 | 0.137  | 0.112  | 0.2460 | 0.12552 | # | HA | - HC |
| 5 | 25 | 2 | 0.500 | 0.137  | 0.072  | 0.3025 | 0.19173 | # | HA | - CZ |
| 5 | 26 | 2 | 0.500 | 0.137  | -0.382 | 0.2785 | 0.29880 | # | HA | - OH |
| 5 | 27 | 2 | 0.500 | 0.137  | 0.364  | 0.1250 | 0.00000 | # | HA | - HH |
| 6 | 9  | 2 | 0.500 | 0.135  | 0.138  | 0.2500 | 0.12552 | # | HA | - HA |
| 6 | 10 | 2 | 0.500 | 0.135  | 0.133  | 0.2500 | 0.12552 | # | HA | - HA |
| 6 | 11 | 2 | 0.500 | 0.135  | 0.028  | 0.3000 | 0.18618 | # | HA | - CB |
| 6 | 12 | 2 | 0.500 | 0.135  | 0.117  | 0.2500 | 0.12552 | # | HA | - HA |
| 6 | 13 | 2 | 0.500 | 0.135  | -0.423 | 0.2785 | 0.29880 | # | HA | - OH |
| 6 | 14 | 2 | 0.500 | 0.135  | 0.347  | 0.1250 | 0.00000 | # | HA | - HO |
| 6 | 15 | 2 | 0.500 | 0.135  | -0.030 | 0.3025 | 0.19173 | # | HA | - CC |

|    |    |   |       |        |        |        |         |   |    |   |    |
|----|----|---|-------|--------|--------|--------|---------|---|----|---|----|
| 6  | 16 | 2 | 0.500 | 0.135  | -0.105 | 0.3025 | 0.19173 | # | HA | - | CC |
| 6  | 17 | 2 | 0.500 | 0.135  | 0.107  | 0.2460 | 0.12552 | # | HA | - | HC |
| 6  | 18 | 2 | 0.500 | 0.135  | -0.102 | 0.3025 | 0.19173 | # | HA | - | CC |
| 6  | 19 | 2 | 0.500 | 0.135  | 0.104  | 0.2460 | 0.12552 | # | HA | - | HC |
| 6  | 20 | 2 | 0.500 | 0.135  | 0.073  | 0.3025 | 0.19173 | # | HA | - | CC |
| 6  | 21 | 2 | 0.500 | 0.135  | -0.395 | 0.2785 | 0.29880 | # | HA | - | OH |
| 6  | 22 | 2 | 0.500 | 0.135  | 0.341  | 0.1250 | 0.00000 | # | HA | - | HH |
| 6  | 23 | 2 | 0.500 | 0.135  | -0.107 | 0.3025 | 0.19173 | # | HA | - | CC |
| 6  | 24 | 2 | 0.500 | 0.135  | 0.112  | 0.2460 | 0.12552 | # | HA | - | HC |
| 6  | 25 | 2 | 0.500 | 0.135  | 0.072  | 0.3025 | 0.19173 | # | HA | - | CZ |
| 6  | 26 | 2 | 0.500 | 0.135  | -0.382 | 0.2785 | 0.29880 | # | HA | - | OH |
| 6  | 27 | 2 | 0.500 | 0.135  | 0.364  | 0.1250 | 0.00000 | # | HA | - | HH |
| 7  | 9  | 2 | 0.500 | 0.135  | 0.138  | 0.2500 | 0.12552 | # | HA | - | HA |
| 7  | 10 | 2 | 0.500 | 0.135  | 0.133  | 0.2500 | 0.12552 | # | HA | - | HA |
| 7  | 11 | 2 | 0.500 | 0.135  | 0.028  | 0.3000 | 0.18618 | # | HA | - | CB |
| 7  | 12 | 2 | 0.500 | 0.135  | 0.117  | 0.2500 | 0.12552 | # | HA | - | HA |
| 7  | 13 | 2 | 0.500 | 0.135  | -0.423 | 0.2785 | 0.29880 | # | HA | - | OH |
| 7  | 14 | 2 | 0.500 | 0.135  | 0.347  | 0.1250 | 0.00000 | # | HA | - | HO |
| 7  | 15 | 2 | 0.500 | 0.135  | -0.030 | 0.3025 | 0.19173 | # | HA | - | CC |
| 7  | 16 | 2 | 0.500 | 0.135  | -0.105 | 0.3025 | 0.19173 | # | HA | - | CC |
| 7  | 17 | 2 | 0.500 | 0.135  | 0.107  | 0.2460 | 0.12552 | # | HA | - | HC |
| 7  | 18 | 2 | 0.500 | 0.135  | -0.102 | 0.3025 | 0.19173 | # | HA | - | CC |
| 7  | 19 | 2 | 0.500 | 0.135  | 0.104  | 0.2460 | 0.12552 | # | HA | - | HC |
| 7  | 20 | 2 | 0.500 | 0.135  | 0.073  | 0.3025 | 0.19173 | # | HA | - | CC |
| 7  | 21 | 2 | 0.500 | 0.135  | -0.395 | 0.2785 | 0.29880 | # | HA | - | OH |
| 7  | 22 | 2 | 0.500 | 0.135  | 0.341  | 0.1250 | 0.00000 | # | HA | - | HH |
| 7  | 23 | 2 | 0.500 | 0.135  | -0.107 | 0.3025 | 0.19173 | # | HA | - | CC |
| 7  | 24 | 2 | 0.500 | 0.135  | 0.112  | 0.2460 | 0.12552 | # | HA | - | HC |
| 7  | 25 | 2 | 0.500 | 0.135  | 0.072  | 0.3025 | 0.19173 | # | HA | - | CZ |
| 7  | 26 | 2 | 0.500 | 0.135  | -0.382 | 0.2785 | 0.29880 | # | HA | - | OH |
| 7  | 27 | 2 | 0.500 | 0.135  | 0.364  | 0.1250 | 0.00000 | # | HA | - | HH |
| 8  | 17 | 2 | 0.500 | -0.024 | 0.107  | 0.2960 | 0.18618 | # | CA | - | HC |
| 8  | 19 | 2 | 0.500 | -0.024 | 0.104  | 0.2960 | 0.18618 | # | CA | - | HC |
| 8  | 20 | 2 | 0.500 | -0.024 | 0.073  | 0.3525 | 0.28439 | # | CA | - | CC |
| 8  | 21 | 2 | 0.500 | -0.024 | -0.395 | 0.3285 | 0.44319 | # | CA | - | OH |
| 8  | 22 | 2 | 0.500 | -0.024 | 0.341  | 0.1750 | 0.00000 | # | CA | - | HH |
| 8  | 23 | 2 | 0.500 | -0.024 | -0.107 | 0.3525 | 0.28439 | # | CA | - | CC |
| 8  | 24 | 2 | 0.500 | -0.024 | 0.112  | 0.2960 | 0.18618 | # | CA | - | HC |
| 8  | 25 | 2 | 0.500 | -0.024 | 0.072  | 0.3525 | 0.28439 | # | CA | - | CZ |
| 8  | 26 | 2 | 0.500 | -0.024 | -0.382 | 0.3285 | 0.44319 | # | CA | - | OH |
| 8  | 27 | 2 | 0.500 | -0.024 | 0.364  | 0.1750 | 0.00000 | # | CA | - | HH |
| 9  | 14 | 2 | 0.500 | 0.138  | 0.347  | 0.1250 | 0.00000 | # | HA | - | HO |
| 9  | 16 | 2 | 0.500 | 0.138  | -0.105 | 0.3025 | 0.19173 | # | HA | - | CC |
| 9  | 17 | 2 | 0.500 | 0.138  | 0.107  | 0.2460 | 0.12552 | # | HA | - | HC |
| 9  | 18 | 2 | 0.500 | 0.138  | -0.102 | 0.3025 | 0.19173 | # | HA | - | CC |
| 9  | 19 | 2 | 0.500 | 0.138  | 0.104  | 0.2460 | 0.12552 | # | HA | - | HC |
| 9  | 20 | 2 | 0.500 | 0.138  | 0.073  | 0.3025 | 0.19173 | # | HA | - | CC |
| 9  | 21 | 2 | 0.500 | 0.138  | -0.395 | 0.2785 | 0.29880 | # | HA | - | OH |
| 9  | 22 | 2 | 0.500 | 0.138  | 0.341  | 0.1250 | 0.00000 | # | HA | - | HH |
| 9  | 23 | 2 | 0.500 | 0.138  | -0.107 | 0.3025 | 0.19173 | # | HA | - | CC |
| 9  | 24 | 2 | 0.500 | 0.138  | 0.112  | 0.2460 | 0.12552 | # | HA | - | HC |
| 9  | 25 | 2 | 0.500 | 0.138  | 0.072  | 0.3025 | 0.19173 | # | HA | - | CZ |
| 9  | 26 | 2 | 0.500 | 0.138  | -0.382 | 0.2785 | 0.29880 | # | HA | - | OH |
| 9  | 27 | 2 | 0.500 | 0.138  | 0.364  | 0.1250 | 0.00000 | # | HA | - | HH |
| 10 | 14 | 2 | 0.500 | 0.133  | 0.347  | 0.1250 | 0.00000 | # | HA | - | HO |
| 10 | 16 | 2 | 0.500 | 0.133  | -0.105 | 0.3025 | 0.19173 | # | HA | - | CC |
| 10 | 17 | 2 | 0.500 | 0.133  | 0.107  | 0.2460 | 0.12552 | # | HA | - | HC |
| 10 | 18 | 2 | 0.500 | 0.133  | -0.102 | 0.3025 | 0.19173 | # | HA | - | CC |
| 10 | 19 | 2 | 0.500 | 0.133  | 0.104  | 0.2460 | 0.12552 | # | HA | - | HC |
| 10 | 20 | 2 | 0.500 | 0.133  | 0.073  | 0.3025 | 0.19173 | # | HA | - | CC |

|    |    |   |       |        |        |        |         |   |    |      |
|----|----|---|-------|--------|--------|--------|---------|---|----|------|
| 10 | 21 | 2 | 0.500 | 0.133  | -0.395 | 0.2785 | 0.29880 | # | HA | - OH |
| 10 | 22 | 2 | 0.500 | 0.133  | 0.341  | 0.1250 | 0.00000 | # | HA | - HH |
| 10 | 23 | 2 | 0.500 | 0.133  | -0.107 | 0.3025 | 0.19173 | # | HA | - CC |
| 10 | 24 | 2 | 0.500 | 0.133  | 0.112  | 0.2460 | 0.12552 | # | HA | - HC |
| 10 | 25 | 2 | 0.500 | 0.133  | 0.072  | 0.3025 | 0.19173 | # | HA | - CZ |
| 10 | 26 | 2 | 0.500 | 0.133  | -0.382 | 0.2785 | 0.29880 | # | HA | - OH |
| 10 | 27 | 2 | 0.500 | 0.133  | 0.364  | 0.1250 | 0.00000 | # | HA | - HH |
| 11 | 21 | 2 | 0.500 | 0.028  | -0.395 | 0.3285 | 0.44319 | # | CB | - OH |
| 11 | 22 | 2 | 0.500 | 0.028  | 0.341  | 0.1750 | 0.00000 | # | CB | - HH |
| 11 | 24 | 2 | 0.500 | 0.028  | 0.112  | 0.2960 | 0.18618 | # | CB | - HC |
| 11 | 25 | 2 | 0.500 | 0.028  | 0.072  | 0.3525 | 0.28439 | # | CB | - CZ |
| 11 | 26 | 2 | 0.500 | 0.028  | -0.382 | 0.3285 | 0.44319 | # | CB | - OH |
| 11 | 27 | 2 | 0.500 | 0.028  | 0.364  | 0.1750 | 0.00000 | # | CB | - HH |
| 12 | 17 | 2 | 0.500 | 0.117  | 0.107  | 0.2460 | 0.12552 | # | HA | - HC |
| 12 | 19 | 2 | 0.500 | 0.117  | 0.104  | 0.2460 | 0.12552 | # | HA | - HC |
| 12 | 20 | 2 | 0.500 | 0.117  | 0.073  | 0.3025 | 0.19173 | # | HA | - CC |
| 12 | 21 | 2 | 0.500 | 0.117  | -0.395 | 0.2785 | 0.29880 | # | HA | - OH |
| 12 | 22 | 2 | 0.500 | 0.117  | 0.341  | 0.1250 | 0.00000 | # | HA | - HH |
| 12 | 23 | 2 | 0.500 | 0.117  | -0.107 | 0.3025 | 0.19173 | # | HA | - CC |
| 12 | 24 | 2 | 0.500 | 0.117  | 0.112  | 0.2460 | 0.12552 | # | HA | - HC |
| 12 | 25 | 2 | 0.500 | 0.117  | 0.072  | 0.3025 | 0.19173 | # | HA | - CZ |
| 12 | 26 | 2 | 0.500 | 0.117  | -0.382 | 0.2785 | 0.29880 | # | HA | - OH |
| 12 | 27 | 2 | 0.500 | 0.117  | 0.364  | 0.1250 | 0.00000 | # | HA | - HH |
| 13 | 17 | 2 | 0.500 | -0.423 | 0.107  | 0.2745 | 0.29880 | # | OH | - HC |
| 13 | 19 | 2 | 0.500 | -0.423 | 0.104  | 0.2745 | 0.29880 | # | OH | - HC |
| 13 | 20 | 2 | 0.500 | -0.423 | 0.073  | 0.3310 | 0.45642 | # | OH | - CC |
| 13 | 21 | 2 | 0.500 | -0.423 | -0.395 | 0.3070 | 0.71128 | # | OH | - OH |
| 13 | 22 | 2 | 0.500 | -0.423 | 0.341  | 0.1535 | 0.00000 | # | OH | - HH |
| 13 | 23 | 2 | 0.500 | -0.423 | -0.107 | 0.3310 | 0.45642 | # | OH | - CC |
| 13 | 24 | 2 | 0.500 | -0.423 | 0.112  | 0.2745 | 0.29880 | # | OH | - HC |
| 13 | 25 | 2 | 0.500 | -0.423 | 0.072  | 0.3310 | 0.45642 | # | OH | - CZ |
| 13 | 26 | 2 | 0.500 | -0.423 | -0.382 | 0.3070 | 0.71128 | # | OH | - OH |
| 13 | 27 | 2 | 0.500 | -0.423 | 0.364  | 0.1535 | 0.00000 | # | OH | - HH |
| 14 | 16 | 2 | 0.500 | 0.347  | -0.105 | 0.1775 | 0.00000 | # | HO | - CC |
| 14 | 17 | 2 | 0.500 | 0.347  | 0.107  | 0.1210 | 0.00000 | # | HO | - HC |
| 14 | 18 | 2 | 0.500 | 0.347  | -0.102 | 0.1775 | 0.00000 | # | HO | - CC |
| 14 | 19 | 2 | 0.500 | 0.347  | 0.104  | 0.1210 | 0.00000 | # | HO | - HC |
| 14 | 20 | 2 | 0.500 | 0.347  | 0.073  | 0.1775 | 0.00000 | # | HO | - CC |
| 14 | 21 | 2 | 0.500 | 0.347  | -0.395 | 0.1535 | 0.00000 | # | HO | - OH |
| 14 | 22 | 2 | 0.500 | 0.347  | 0.341  | 0.0000 | 0.00000 | # | HO | - HH |
| 14 | 23 | 2 | 0.500 | 0.347  | -0.107 | 0.1775 | 0.00000 | # | HO | - CC |
| 14 | 24 | 2 | 0.500 | 0.347  | 0.112  | 0.1210 | 0.00000 | # | HO | - HC |
| 14 | 25 | 2 | 0.500 | 0.347  | 0.072  | 0.1775 | 0.00000 | # | HO | - CZ |
| 14 | 26 | 2 | 0.500 | 0.347  | -0.382 | 0.1535 | 0.00000 | # | HO | - OH |
| 14 | 27 | 2 | 0.500 | 0.347  | 0.364  | 0.0000 | 0.00000 | # | HO | - HH |
| 15 | 22 | 2 | 0.500 | -0.030 | 0.341  | 0.1775 | 0.00000 | # | CC | - HH |
| 15 | 26 | 2 | 0.500 | -0.030 | -0.382 | 0.3310 | 0.45642 | # | CC | - OH |
| 15 | 27 | 2 | 0.500 | -0.030 | 0.364  | 0.1775 | 0.00000 | # | CC | - HH |
| 16 | 24 | 2 | 0.500 | -0.105 | 0.112  | 0.2985 | 0.19173 | # | CC | - HC |
| 16 | 27 | 2 | 0.500 | -0.105 | 0.364  | 0.1775 | 0.00000 | # | CC | - HH |
| 17 | 19 | 2 | 0.500 | 0.107  | 0.104  | 0.2420 | 0.12552 | # | HC | - HC |
| 17 | 22 | 2 | 0.500 | 0.107  | 0.341  | 0.1210 | 0.00000 | # | HC | - HH |
| 17 | 23 | 2 | 0.500 | 0.107  | -0.107 | 0.2985 | 0.19173 | # | HC | - CC |
| 17 | 24 | 2 | 0.500 | 0.107  | 0.112  | 0.2420 | 0.12552 | # | HC | - HC |
| 17 | 26 | 2 | 0.500 | 0.107  | -0.382 | 0.2745 | 0.29880 | # | HC | - OH |
| 17 | 27 | 2 | 0.500 | 0.107  | 0.364  | 0.1210 | 0.00000 | # | HC | - HH |
| 18 | 21 | 2 | 0.500 | -0.102 | -0.395 | 0.3310 | 0.45642 | # | CC | - OH |
| 18 | 22 | 2 | 0.500 | -0.102 | 0.341  | 0.1775 | 0.00000 | # | CC | - HH |
| 18 | 27 | 2 | 0.500 | -0.102 | 0.364  | 0.1775 | 0.00000 | # | CC | - HH |
| 19 | 20 | 2 | 0.500 | 0.104  | 0.073  | 0.2985 | 0.19173 | # | HC | - CC |

|    |    |   |       |        |        |        |         |   |    |   |    |
|----|----|---|-------|--------|--------|--------|---------|---|----|---|----|
| 19 | 21 | 2 | 0.500 | 0.104  | -0.395 | 0.2745 | 0.29880 | # | HC | - | OH |
| 19 | 22 | 2 | 0.500 | 0.104  | 0.341  | 0.1210 | 0.00000 | # | HC | - | HH |
| 19 | 26 | 2 | 0.500 | 0.104  | -0.382 | 0.2745 | 0.29880 | # | HC | - | OH |
| 19 | 27 | 2 | 0.500 | 0.104  | 0.364  | 0.1210 | 0.00000 | # | HC | - | HH |
| 21 | 24 | 2 | 0.500 | -0.395 | 0.112  | 0.2745 | 0.29880 | # | OH | - | HC |
| 21 | 27 | 2 | 0.500 | -0.395 | 0.364  | 0.1535 | 0.00000 | # | OH | - | HH |
| 22 | 23 | 2 | 0.500 | 0.341  | -0.107 | 0.1775 | 0.00000 | # | HH | - | CC |
| 22 | 24 | 2 | 0.500 | 0.341  | 0.112  | 0.1210 | 0.00000 | # | HH | - | HC |
| 22 | 26 | 2 | 0.500 | 0.341  | -0.382 | 0.1535 | 0.00000 | # | HH | - | OH |
| 22 | 27 | 2 | 0.500 | 0.341  | 0.364  | 0.0000 | 0.00000 | # | HH | - | HH |
| 24 | 27 | 2 | 0.500 | 0.112  | 0.364  | 0.1210 | 0.00000 | # | HC | - | HH |

; Exclusions from default nonbonded

[ exclusions ]

; ai aj

|   |    |
|---|----|
| 1 | 2  |
| 1 | 3  |
| 1 | 4  |
| 1 | 5  |
| 1 | 6  |
| 1 | 7  |
| 1 | 8  |
| 1 | 9  |
| 1 | 10 |
| 1 | 11 |
| 1 | 12 |
| 1 | 13 |
| 1 | 14 |
| 1 | 15 |
| 1 | 16 |
| 1 | 17 |
| 1 | 18 |
| 1 | 19 |
| 1 | 20 |
| 1 | 21 |
| 1 | 22 |
| 1 | 23 |
| 1 | 24 |
| 1 | 25 |
| 1 | 26 |
| 1 | 27 |
| 2 | 3  |
| 2 | 4  |
| 2 | 5  |
| 2 | 6  |
| 2 | 7  |
| 2 | 8  |
| 2 | 9  |
| 2 | 10 |
| 2 | 11 |
| 2 | 12 |
| 2 | 13 |
| 2 | 14 |
| 2 | 15 |
| 2 | 16 |
| 2 | 17 |
| 2 | 18 |
| 2 | 19 |
| 2 | 20 |
| 2 | 21 |

2 22  
2 23  
2 24  
2 25  
2 26  
2 27  
3 4  
3 5  
3 6  
3 7  
3 8  
3 9  
3 10  
3 11  
3 12  
3 13  
3 14  
3 15  
3 16  
3 17  
3 18  
3 19  
3 20  
3 21  
3 22  
3 23  
3 24  
3 25  
3 26  
3 27  
4 5  
4 6  
4 7  
4 8  
4 9  
4 10  
4 11  
4 12  
4 13  
4 14  
4 15  
4 16  
4 17  
4 18  
4 19  
4 20  
4 21  
4 22  
4 23  
4 24  
4 25  
4 26  
4 27  
5 6  
5 7  
5 8  
5 9  
5 10  
5 11  
5 12

5 13  
5 14  
5 15  
5 16  
5 17  
5 18  
5 19  
5 20  
5 21  
5 22  
5 23  
5 24  
5 25  
5 26  
5 27  
6 7  
6 8  
6 9  
6 10  
6 11  
6 12  
6 13  
6 14  
6 15  
6 16  
6 17  
6 18  
6 19  
6 20  
6 21  
6 22  
6 23  
6 24  
6 25  
6 26  
6 27  
7 8  
7 9  
7 10  
7 11  
7 12  
7 13  
7 14  
7 15  
7 16  
7 17  
7 18  
7 19  
7 20  
7 21  
7 22  
7 23  
7 24  
7 25  
7 26  
7 27  
8 9  
8 10  
8 11  
8 12

8 13  
8 14  
8 15  
8 16  
8 17  
8 18  
8 19  
8 20  
8 21  
8 22  
8 23  
8 24  
8 25  
8 26  
8 27  
9 10  
9 11  
9 12  
9 13  
9 14  
9 15  
9 16  
9 17  
9 18  
9 19  
9 20  
9 21  
9 22  
9 23  
9 24  
9 25  
9 26  
9 27  
10 11  
10 12  
10 13  
10 14  
10 15  
10 16  
10 17  
10 18  
10 19  
10 20  
10 21  
10 22  
10 23  
10 24  
10 25  
10 26  
10 27  
11 12  
11 13  
11 14  
11 15  
11 16  
11 17  
11 18  
11 19  
11 20  
11 21

11 22  
11 23  
11 24  
11 25  
11 26  
11 27  
12 13  
12 14  
12 15  
12 16  
12 17  
12 18  
12 19  
12 20  
12 21  
12 22  
12 23  
12 24  
12 25  
12 26  
12 27  
13 14  
13 15  
13 16  
13 17  
13 18  
13 19  
13 20  
13 21  
13 22  
13 23  
13 24  
13 25  
13 26  
13 27  
14 15  
14 16  
14 17  
14 18  
14 19  
14 20  
14 21  
14 22  
14 23  
14 24  
14 25  
14 26  
14 27  
15 16  
15 17  
15 18  
15 19  
15 20  
15 21  
15 22  
15 23  
15 24  
15 25  
15 26  
15 27

16 17  
16 18  
16 19  
16 20  
16 21  
16 22  
16 23  
16 24  
16 25  
16 26  
16 27  
17 18  
17 19  
17 20  
17 21  
17 22  
17 23  
17 24  
17 25  
17 26  
17 27  
18 19  
18 20  
18 21  
18 22  
18 23  
18 24  
18 25  
18 26  
18 27  
19 20  
19 21  
19 22  
19 23  
19 24  
19 25  
19 26  
19 27  
20 21  
20 22  
20 23  
20 24  
20 25  
20 26  
20 27  
21 22  
21 23  
21 24  
21 25  
21 26  
21 27  
22 23  
22 24  
22 25  
22 26  
22 27  
23 24  
23 25  
23 26  
23 27

24 25  
24 26  
24 27  
25 26  
25 27  
26 27

## dopa.itp

; OPLS AA force field parameters of L-DOPA generated with JOYCE

[ moleculetype ]

; Name nrexcl

DAH 3

[ atoms ]

; nr type resnr residue atom cgnr charge mass typeB chargeB

; residue 1 DAH rtp DAH q +0.0

|    |           |   |     |     |   |           |         |                 |  |
|----|-----------|---|-----|-----|---|-----------|---------|-----------------|--|
| 1  | oplsm_287 | 1 | DAH | N   | 1 | -0.570913 | 14.0027 |                 |  |
| 2  | oplsm_290 | 1 | DAH | H1  | 1 | 0.344381  | 1.008   |                 |  |
| 3  | oplsm_290 | 1 | DAH | H2  | 1 | 0.325205  | 1.008   |                 |  |
| 4  | oplsm_290 | 1 | DAH | H3  | 1 | 0.377593  | 1.008   |                 |  |
| 5  | oplsm_293 | 1 | DAH | CA  | 1 | 0.028407  | 12.011  |                 |  |
| 6  | oplsm_140 | 1 | DAH | HA  | 1 | 0.132597  | 1.008   |                 |  |
| 7  | oplsm_149 | 1 | DAH | CB  | 2 | -0.140334 | 12.011  |                 |  |
| 8  | oplsm_140 | 1 | DAH | HB1 | 2 | 0.102677  | 1.008   |                 |  |
| 9  | oplsm_140 | 1 | DAH | HB2 | 2 | 0.101894  | 1.008   |                 |  |
| 10 | oplsm_145 | 1 | DAH | CG  | 2 | -0.026831 | 12.011  |                 |  |
| 11 | oplsm_145 | 1 | DAH | CD1 | 3 | -0.110132 | 12.011  |                 |  |
| 12 | oplsm_146 | 1 | DAH | HD1 | 3 | 0.100316  | 1.008   |                 |  |
| 13 | oplsm_145 | 1 | DAH | CD2 | 4 | -0.108542 | 12.011  |                 |  |
| 14 | oplsm_146 | 1 | DAH | HD2 | 4 | 0.102219  | 1.008   |                 |  |
| 15 | oplsm_166 | 1 | DAH | CE1 | 5 | 0.072835  | 12.011  |                 |  |
| 16 | oplsm_167 | 1 | DAH | OE1 | 5 | -0.394908 | 15.9994 |                 |  |
| 17 | oplsm_168 | 1 | DAH | HE1 | 5 | 0.339949  | 1.008   |                 |  |
| 18 | oplsm_145 | 1 | DAH | CE2 | 6 | -0.108072 | 12.011  |                 |  |
| 19 | oplsm_146 | 1 | DAH | HE2 | 6 | 0.111219  | 1.008   |                 |  |
| 20 | oplsm_166 | 1 | DAH | CZ  | 7 | 0.068134  | 12.011  |                 |  |
| 21 | oplsm_167 | 1 | DAH | OH  | 7 | -0.384411 | 15.9994 |                 |  |
| 22 | oplsm_168 | 1 | DAH | HH  | 7 | 0.362376  | 1.008   |                 |  |
| 23 | oplsm_271 | 1 | DAH | C   | 8 | 0.188364  | 12.011  |                 |  |
| 24 | oplsm_272 | 1 | DAH | O1  | 8 | -0.450134 | 15.9994 |                 |  |
| 25 | oplsm_272 | 1 | DAH | O2  | 8 | -0.463910 | 15.9994 | ; qtot 0.000021 |  |

; Stretchings

[ bonds ]

|    |    |   |        |            |
|----|----|---|--------|------------|
| 1  | 2  | 1 | 0.1026 | 368489.034 |
| 1  | 3  | 1 | 0.1054 | 368489.034 |
| 1  | 4  | 1 | 0.1020 | 368489.034 |
| 1  | 5  | 1 | 0.1506 | 180341.536 |
| 5  | 6  | 1 | 0.1095 | 318058.259 |
| 5  | 7  | 1 | 0.1536 | 180195.043 |
| 7  | 8  | 1 | 0.1098 | 314597.457 |
| 7  | 9  | 1 | 0.1096 | 314597.457 |
| 7  | 10 | 1 | 0.1512 | 214106.063 |
| 10 | 11 | 1 | 0.1405 | 332239.630 |
| 11 | 12 | 1 | 0.1090 | 331723.534 |
| 10 | 13 | 1 | 0.1401 | 332239.630 |
| 13 | 14 | 1 | 0.1091 | 331723.534 |
| 11 | 15 | 1 | 0.1391 | 332239.630 |
| 15 | 16 | 1 | 0.1368 | 305030.302 |
| 16 | 17 | 1 | 0.0969 | 480979.109 |
| 13 | 18 | 1 | 0.1402 | 332239.630 |
| 18 | 19 | 1 | 0.1091 | 331723.534 |
| 15 | 20 | 1 | 0.1408 | 309763.805 |
| 18 | 20 | 1 | 0.1391 | 309763.805 |
| 20 | 21 | 1 | 0.1374 | 305476.385 |

|    |    |   |        |            |
|----|----|---|--------|------------|
| 21 | 22 | 1 | 0.0966 | 480979.109 |
| 5  | 23 | 1 | 0.1560 | 136630.345 |
| 23 | 24 | 1 | 0.1269 | 478155.015 |
| 23 | 25 | 1 | 0.1247 | 478155.015 |

; Bendings

[ angles ]

|    |    |    |   |        |          |
|----|----|----|---|--------|----------|
| 2  | 1  | 3  | 1 | 108.76 | 338.0992 |
| 2  | 1  | 4  | 1 | 108.90 | 338.0992 |
| 2  | 1  | 5  | 1 | 111.79 | 354.8638 |
| 3  | 1  | 4  | 1 | 111.69 | 338.0992 |
| 3  | 1  | 5  | 1 | 101.35 | 354.8638 |
| 4  | 1  | 5  | 1 | 114.10 | 354.8638 |
| 1  | 5  | 6  | 1 | 107.34 | 467.6459 |
| 1  | 5  | 7  | 1 | 111.77 | 482.7422 |
| 1  | 5  | 23 | 1 | 105.54 | 528.7628 |
| 6  | 5  | 7  | 1 | 109.70 | 396.4863 |
| 6  | 5  | 23 | 1 | 107.64 | 316.9483 |
| 5  | 7  | 8  | 1 | 109.02 | 342.6356 |
| 5  | 7  | 9  | 1 | 106.28 | 342.6356 |
| 5  | 7  | 10 | 1 | 112.82 | 622.4218 |
| 7  | 5  | 23 | 1 | 114.51 | 523.3779 |
| 8  | 7  | 9  | 1 | 107.62 | 295.6076 |
| 8  | 7  | 10 | 1 | 109.80 | 348.8275 |
| 9  | 7  | 10 | 1 | 111.11 | 348.8275 |
| 7  | 10 | 11 | 1 | 120.42 | 495.9408 |
| 7  | 10 | 13 | 1 | 120.67 | 495.9408 |
| 10 | 11 | 12 | 1 | 120.47 | 295.1435 |
| 11 | 10 | 13 | 1 | 118.84 | 539.0730 |
| 10 | 11 | 15 | 1 | 120.58 | 539.0730 |
| 12 | 11 | 15 | 1 | 118.94 | 295.1435 |
| 10 | 13 | 14 | 1 | 119.99 | 295.1435 |
| 10 | 13 | 18 | 1 | 120.86 | 539.0730 |
| 14 | 13 | 18 | 1 | 119.14 | 295.1435 |
| 11 | 15 | 16 | 1 | 119.53 | 574.6185 |
| 11 | 15 | 20 | 1 | 120.05 | 379.8506 |
| 15 | 16 | 17 | 1 | 108.53 | 518.3672 |
| 16 | 15 | 20 | 1 | 120.42 | 796.0599 |
| 13 | 18 | 19 | 1 | 120.37 | 295.1435 |
| 13 | 18 | 20 | 1 | 119.76 | 379.8506 |
| 19 | 18 | 20 | 1 | 119.86 | 327.6687 |
| 15 | 20 | 18 | 1 | 119.90 | 99.2215  |
| 15 | 20 | 21 | 1 | 115.28 | 699.1805 |
| 18 | 20 | 21 | 1 | 124.82 | 699.1805 |
| 20 | 21 | 22 | 1 | 110.60 | 449.2292 |
| 5  | 23 | 24 | 1 | 114.70 | 372.9536 |
| 5  | 23 | 25 | 1 | 116.62 | 372.9536 |
| 24 | 23 | 25 | 1 | 128.67 | 683.7864 |

; Torsions

[ dihedrals ]

|    |    |    |    |   |         |       |   |
|----|----|----|----|---|---------|-------|---|
| 6  | 5  | 23 | 24 | 1 | 320.79  | 9.731 | 2 |
| 6  | 5  | 23 | 25 | 1 | 318.43  | 9.731 | 2 |
| 2  | 1  | 5  | 6  | 1 | 127.76  | 2.482 | 3 |
| 3  | 1  | 5  | 6  | 1 | 140.68  | 2.482 | 3 |
| 18 | 20 | 21 | 22 | 1 | 0.00    | 3.251 | 1 |
| 18 | 20 | 21 | 22 | 1 | 179.99  | 8.441 | 2 |
| 6  | 5  | 7  | 8  | 1 | -193.73 | 5.697 | 1 |
| 6  | 5  | 7  | 8  | 1 | -94.39  | 1.592 | 2 |
| 6  | 5  | 7  | 8  | 1 | -14.05  | 6.757 | 3 |

|    |    |    |    |   |        |       |   |
|----|----|----|----|---|--------|-------|---|
| 6  | 5  | 7  | 8  | 1 | 8.32   | 0.158 | 4 |
| 8  | 7  | 10 | 13 | 1 | 242.40 | 0.135 | 1 |
| 8  | 7  | 10 | 13 | 1 | 199.06 | 8.060 | 2 |
| 8  | 7  | 10 | 13 | 1 | 252.02 | 0.038 | 3 |
| 8  | 7  | 10 | 13 | 1 | -62.10 | 2.030 | 4 |
| 8  | 7  | 10 | 11 | 1 | 242.40 | 0.135 | 1 |
| 8  | 7  | 10 | 11 | 1 | 199.06 | 8.060 | 2 |
| 8  | 7  | 10 | 11 | 1 | 252.02 | 0.038 | 3 |
| 8  | 7  | 10 | 11 | 1 | -62.10 | 2.030 | 4 |
| 11 | 15 | 16 | 17 | 1 | 359.82 | 3.153 | 1 |
| 11 | 15 | 16 | 17 | 1 | 179.64 | 9.114 | 2 |

; Nonbonded terms

[ pairs ]

; 1-4 interactions

|    |    |   |       |        |        |        |         |   |    |   |    |
|----|----|---|-------|--------|--------|--------|---------|---|----|---|----|
| 1  | 8  | 2 | 0.500 | -0.571 | 0.103  | 0.2875 | 0.14940 | # | N  | - | HA |
| 1  | 9  | 2 | 0.500 | -0.571 | 0.102  | 0.2875 | 0.14940 | # | N  | - | HA |
| 1  | 10 | 2 | 0.500 | -0.571 | -0.027 | 0.3400 | 0.22821 | # | N  | - | CC |
| 1  | 24 | 2 | 0.500 | -0.571 | -0.450 | 0.3105 | 0.39527 | # | N  | - | O  |
| 1  | 25 | 2 | 0.500 | -0.571 | -0.464 | 0.3105 | 0.39527 | # | N  | - | O  |
| 2  | 6  | 2 | 0.500 | 0.344  | 0.133  | 0.1250 | 0.00000 | # | H  | - | HA |
| 2  | 7  | 2 | 0.500 | 0.344  | -0.140 | 0.1750 | 0.00000 | # | H  | - | CB |
| 2  | 23 | 2 | 0.500 | 0.344  | 0.188  | 0.1875 | 0.00000 | # | H  | - | C  |
| 3  | 6  | 2 | 0.500 | 0.325  | 0.133  | 0.1250 | 0.00000 | # | H  | - | HA |
| 3  | 7  | 2 | 0.500 | 0.325  | -0.140 | 0.1750 | 0.00000 | # | H  | - | CB |
| 3  | 23 | 2 | 0.500 | 0.325  | 0.188  | 0.1875 | 0.00000 | # | H  | - | C  |
| 4  | 6  | 2 | 0.500 | 0.378  | 0.133  | 0.1250 | 0.00000 | # | H  | - | HA |
| 4  | 7  | 2 | 0.500 | 0.378  | -0.140 | 0.1750 | 0.00000 | # | H  | - | CB |
| 4  | 23 | 2 | 0.500 | 0.378  | 0.188  | 0.1875 | 0.00000 | # | H  | - | C  |
| 5  | 11 | 2 | 0.500 | 0.028  | -0.110 | 0.3525 | 0.14219 | # | CA | - | CC |
| 5  | 13 | 2 | 0.500 | 0.028  | -0.109 | 0.3525 | 0.14219 | # | CA | - | CC |
| 6  | 8  | 2 | 0.500 | 0.133  | 0.103  | 0.2500 | 0.06276 | # | HA | - | HA |
| 6  | 9  | 2 | 0.500 | 0.133  | 0.102  | 0.2500 | 0.06276 | # | HA | - | HA |
| 6  | 10 | 2 | 0.500 | 0.133  | -0.027 | 0.3025 | 0.09587 | # | HA | - | CC |
| 6  | 24 | 2 | 0.500 | 0.133  | -0.450 | 0.2730 | 0.16605 | # | HA | - | O  |
| 6  | 25 | 2 | 0.500 | 0.133  | -0.464 | 0.2730 | 0.16605 | # | HA | - | O  |
| 7  | 12 | 2 | 0.500 | -0.140 | 0.100  | 0.2960 | 0.09309 | # | CB | - | HC |
| 7  | 14 | 2 | 0.500 | -0.140 | 0.102  | 0.2960 | 0.09309 | # | CB | - | HC |
| 7  | 15 | 2 | 0.500 | -0.140 | 0.073  | 0.3525 | 0.14219 | # | CB | - | CC |
| 7  | 18 | 2 | 0.500 | -0.140 | -0.108 | 0.3525 | 0.14219 | # | CB | - | CC |
| 7  | 24 | 2 | 0.500 | -0.140 | -0.450 | 0.3230 | 0.24629 | # | CB | - | O  |
| 7  | 25 | 2 | 0.500 | -0.140 | -0.464 | 0.3230 | 0.24629 | # | CB | - | O  |
| 8  | 11 | 2 | 0.500 | 0.103  | -0.110 | 0.3025 | 0.09587 | # | HA | - | CC |
| 8  | 13 | 2 | 0.500 | 0.103  | -0.109 | 0.3025 | 0.09587 | # | HA | - | CC |
| 8  | 23 | 2 | 0.500 | 0.103  | 0.188  | 0.3125 | 0.11741 | # | HA | - | C  |
| 9  | 11 | 2 | 0.500 | 0.102  | -0.110 | 0.3025 | 0.09587 | # | HA | - | CC |
| 9  | 13 | 2 | 0.500 | 0.102  | -0.109 | 0.3025 | 0.09587 | # | HA | - | CC |
| 9  | 23 | 2 | 0.500 | 0.102  | 0.188  | 0.3125 | 0.11741 | # | HA | - | C  |
| 10 | 16 | 2 | 0.500 | -0.027 | -0.395 | 0.3310 | 0.22821 | # | CC | - | OH |
| 10 | 19 | 2 | 0.500 | -0.027 | 0.111  | 0.2985 | 0.09587 | # | CC | - | HC |
| 10 | 20 | 2 | 0.500 | -0.027 | 0.068  | 0.3550 | 0.14644 | # | CC | - | CZ |
| 10 | 23 | 2 | 0.500 | -0.027 | 0.188  | 0.3650 | 0.17935 | # | CC | - | C  |
| 11 | 14 | 2 | 0.500 | -0.110 | 0.102  | 0.2985 | 0.09587 | # | CC | - | HC |
| 11 | 17 | 2 | 0.500 | -0.110 | 0.340  | 0.1775 | 0.00000 | # | CC | - | HH |
| 11 | 18 | 2 | 0.500 | -0.110 | -0.108 | 0.3550 | 0.14644 | # | CC | - | CC |
| 11 | 21 | 2 | 0.500 | -0.110 | -0.384 | 0.3310 | 0.22821 | # | CC | - | OH |
| 12 | 13 | 2 | 0.500 | 0.100  | -0.109 | 0.2985 | 0.09587 | # | HC | - | CC |
| 12 | 16 | 2 | 0.500 | 0.100  | -0.395 | 0.2745 | 0.14940 | # | HC | - | OH |
| 12 | 20 | 2 | 0.500 | 0.100  | 0.068  | 0.2985 | 0.09587 | # | HC | - | CZ |
| 13 | 15 | 2 | 0.500 | -0.109 | 0.073  | 0.3550 | 0.14644 | # | CC | - | CC |

|    |    |   |       |        |        |        |         |   |    |      |
|----|----|---|-------|--------|--------|--------|---------|---|----|------|
| 13 | 21 | 2 | 0.500 | -0.109 | -0.384 | 0.3310 | 0.22821 | # | CC | - OH |
| 14 | 19 | 2 | 0.500 | 0.102  | 0.111  | 0.2420 | 0.06276 | # | HC | - HC |
| 14 | 20 | 2 | 0.500 | 0.102  | 0.068  | 0.2985 | 0.09587 | # | HC | - CZ |
| 15 | 19 | 2 | 0.500 | 0.073  | 0.111  | 0.2985 | 0.09587 | # | CC | - HC |
| 15 | 22 | 2 | 0.500 | 0.073  | 0.362  | 0.1775 | 0.00000 | # | CC | - HH |
| 16 | 18 | 2 | 0.500 | -0.395 | -0.108 | 0.3310 | 0.22821 | # | OH | - CC |
| 16 | 21 | 2 | 0.500 | -0.395 | -0.384 | 0.3070 | 0.35564 | # | OH | - OH |
| 17 | 20 | 2 | 0.500 | 0.340  | 0.068  | 0.1775 | 0.00000 | # | HH | - CZ |
| 18 | 22 | 2 | 0.500 | -0.108 | 0.362  | 0.1775 | 0.00000 | # | CC | - HH |
| 19 | 21 | 2 | 0.500 | 0.111  | -0.384 | 0.2745 | 0.14940 | # | HC | - OH |
| 1  | 11 | 2 | 0.500 | -0.571 | -0.110 | 0.3400 | 0.45642 | # | N  | - CC |
| 1  | 12 | 2 | 0.500 | -0.571 | 0.100  | 0.2835 | 0.29880 | # | N  | - HC |
| 1  | 13 | 2 | 0.500 | -0.571 | -0.109 | 0.3400 | 0.45642 | # | N  | - CC |
| 1  | 14 | 2 | 0.500 | -0.571 | 0.102  | 0.2835 | 0.29880 | # | N  | - HC |
| 1  | 15 | 2 | 0.500 | -0.571 | 0.073  | 0.3400 | 0.45642 | # | N  | - CC |
| 1  | 16 | 2 | 0.500 | -0.571 | -0.395 | 0.3160 | 0.71128 | # | N  | - OH |
| 1  | 17 | 2 | 0.500 | -0.571 | 0.340  | 0.1625 | 0.00000 | # | N  | - HH |
| 1  | 18 | 2 | 0.500 | -0.571 | -0.108 | 0.3400 | 0.45642 | # | N  | - CC |
| 1  | 19 | 2 | 0.500 | -0.571 | 0.111  | 0.2835 | 0.29880 | # | N  | - HC |
| 1  | 20 | 2 | 0.500 | -0.571 | 0.068  | 0.3400 | 0.45642 | # | N  | - CZ |
| 1  | 21 | 2 | 0.500 | -0.571 | -0.384 | 0.3160 | 0.71128 | # | N  | - OH |
| 1  | 22 | 2 | 0.500 | -0.571 | 0.362  | 0.1625 | 0.00000 | # | N  | - HH |
| 2  | 8  | 2 | 0.500 | 0.344  | 0.103  | 0.1250 | 0.00000 | # | H  | - HA |
| 2  | 9  | 2 | 0.500 | 0.344  | 0.102  | 0.1250 | 0.00000 | # | H  | - HA |
| 2  | 10 | 2 | 0.500 | 0.344  | -0.027 | 0.1775 | 0.00000 | # | H  | - CC |
| 2  | 11 | 2 | 0.500 | 0.344  | -0.110 | 0.1775 | 0.00000 | # | H  | - CC |
| 2  | 12 | 2 | 0.500 | 0.344  | 0.100  | 0.1210 | 0.00000 | # | H  | - HC |
| 2  | 13 | 2 | 0.500 | 0.344  | -0.109 | 0.1775 | 0.00000 | # | H  | - CC |
| 2  | 14 | 2 | 0.500 | 0.344  | 0.102  | 0.1210 | 0.00000 | # | H  | - HC |
| 2  | 15 | 2 | 0.500 | 0.344  | 0.073  | 0.1775 | 0.00000 | # | H  | - CC |
| 2  | 16 | 2 | 0.500 | 0.344  | -0.395 | 0.1535 | 0.00000 | # | H  | - OH |
| 2  | 17 | 2 | 0.500 | 0.344  | 0.340  | 0.0000 | 0.00000 | # | H  | - HH |
| 2  | 18 | 2 | 0.500 | 0.344  | -0.108 | 0.1775 | 0.00000 | # | H  | - CC |
| 2  | 19 | 2 | 0.500 | 0.344  | 0.111  | 0.1210 | 0.00000 | # | H  | - HC |
| 2  | 20 | 2 | 0.500 | 0.344  | 0.068  | 0.1775 | 0.00000 | # | H  | - CZ |
| 2  | 21 | 2 | 0.500 | 0.344  | -0.384 | 0.1535 | 0.00000 | # | H  | - OH |
| 2  | 22 | 2 | 0.500 | 0.344  | 0.362  | 0.0000 | 0.00000 | # | H  | - HH |
| 2  | 24 | 2 | 0.500 | 0.344  | -0.450 | 0.1480 | 0.00000 | # | H  | - O  |
| 2  | 25 | 2 | 0.500 | 0.344  | -0.464 | 0.1480 | 0.00000 | # | H  | - O  |
| 3  | 8  | 2 | 0.500 | 0.325  | 0.103  | 0.1250 | 0.00000 | # | H  | - HA |
| 3  | 9  | 2 | 0.500 | 0.325  | 0.102  | 0.1250 | 0.00000 | # | H  | - HA |
| 3  | 10 | 2 | 0.500 | 0.325  | -0.027 | 0.1775 | 0.00000 | # | H  | - CC |
| 3  | 11 | 2 | 0.500 | 0.325  | -0.110 | 0.1775 | 0.00000 | # | H  | - CC |
| 3  | 12 | 2 | 0.500 | 0.325  | 0.100  | 0.1210 | 0.00000 | # | H  | - HC |
| 3  | 13 | 2 | 0.500 | 0.325  | -0.109 | 0.1775 | 0.00000 | # | H  | - CC |
| 3  | 14 | 2 | 0.500 | 0.325  | 0.102  | 0.1210 | 0.00000 | # | H  | - HC |
| 3  | 15 | 2 | 0.500 | 0.325  | 0.073  | 0.1775 | 0.00000 | # | H  | - CC |
| 3  | 16 | 2 | 0.500 | 0.325  | -0.395 | 0.1535 | 0.00000 | # | H  | - OH |
| 3  | 17 | 2 | 0.500 | 0.325  | 0.340  | 0.0000 | 0.00000 | # | H  | - HH |
| 3  | 18 | 2 | 0.500 | 0.325  | -0.108 | 0.1775 | 0.00000 | # | H  | - CC |
| 3  | 19 | 2 | 0.500 | 0.325  | 0.111  | 0.1210 | 0.00000 | # | H  | - HC |
| 3  | 20 | 2 | 0.500 | 0.325  | 0.068  | 0.1775 | 0.00000 | # | H  | - CZ |
| 3  | 21 | 2 | 0.500 | 0.325  | -0.384 | 0.1535 | 0.00000 | # | H  | - OH |
| 3  | 22 | 2 | 0.500 | 0.325  | 0.362  | 0.0000 | 0.00000 | # | H  | - HH |
| 3  | 24 | 2 | 0.500 | 0.325  | -0.450 | 0.1480 | 0.00000 | # | H  | - O  |
| 3  | 25 | 2 | 0.500 | 0.325  | -0.464 | 0.1480 | 0.00000 | # | H  | - O  |
| 4  | 8  | 2 | 0.500 | 0.378  | 0.103  | 0.1250 | 0.00000 | # | H  | - HA |
| 4  | 9  | 2 | 0.500 | 0.378  | 0.102  | 0.1250 | 0.00000 | # | H  | - HA |
| 4  | 10 | 2 | 0.500 | 0.378  | -0.027 | 0.1775 | 0.00000 | # | H  | - CC |
| 4  | 11 | 2 | 0.500 | 0.378  | -0.110 | 0.1775 | 0.00000 | # | H  | - CC |

|   |    |   |       |        |        |        |         |   |    |   |    |
|---|----|---|-------|--------|--------|--------|---------|---|----|---|----|
| 4 | 12 | 2 | 0.500 | 0.378  | 0.100  | 0.1210 | 0.00000 | # | H  | - | HC |
| 4 | 13 | 2 | 0.500 | 0.378  | -0.109 | 0.1775 | 0.00000 | # | H  | - | CC |
| 4 | 14 | 2 | 0.500 | 0.378  | 0.102  | 0.1210 | 0.00000 | # | H  | - | HC |
| 4 | 15 | 2 | 0.500 | 0.378  | 0.073  | 0.1775 | 0.00000 | # | H  | - | CC |
| 4 | 16 | 2 | 0.500 | 0.378  | -0.395 | 0.1535 | 0.00000 | # | H  | - | OH |
| 4 | 17 | 2 | 0.500 | 0.378  | 0.340  | 0.0000 | 0.00000 | # | H  | - | HH |
| 4 | 18 | 2 | 0.500 | 0.378  | -0.108 | 0.1775 | 0.00000 | # | H  | - | CC |
| 4 | 19 | 2 | 0.500 | 0.378  | 0.111  | 0.1210 | 0.00000 | # | H  | - | HC |
| 4 | 20 | 2 | 0.500 | 0.378  | 0.068  | 0.1775 | 0.00000 | # | H  | - | CZ |
| 4 | 21 | 2 | 0.500 | 0.378  | -0.384 | 0.1535 | 0.00000 | # | H  | - | OH |
| 4 | 22 | 2 | 0.500 | 0.378  | 0.362  | 0.0000 | 0.00000 | # | H  | - | HH |
| 4 | 24 | 2 | 0.500 | 0.378  | -0.450 | 0.1480 | 0.00000 | # | H  | - | O  |
| 4 | 25 | 2 | 0.500 | 0.378  | -0.464 | 0.1480 | 0.00000 | # | H  | - | O  |
| 5 | 12 | 2 | 0.500 | 0.028  | 0.100  | 0.2960 | 0.18618 | # | CA | - | HC |
| 5 | 14 | 2 | 0.500 | 0.028  | 0.102  | 0.2960 | 0.18618 | # | CA | - | HC |
| 5 | 15 | 2 | 0.500 | 0.028  | 0.073  | 0.3525 | 0.28439 | # | CA | - | CC |
| 5 | 16 | 2 | 0.500 | 0.028  | -0.395 | 0.3285 | 0.44319 | # | CA | - | OH |
| 5 | 17 | 2 | 0.500 | 0.028  | 0.340  | 0.1750 | 0.00000 | # | CA | - | HH |
| 5 | 18 | 2 | 0.500 | 0.028  | -0.108 | 0.3525 | 0.28439 | # | CA | - | CC |
| 5 | 19 | 2 | 0.500 | 0.028  | 0.111  | 0.2960 | 0.18618 | # | CA | - | HC |
| 5 | 20 | 2 | 0.500 | 0.028  | 0.068  | 0.3525 | 0.28439 | # | CA | - | CZ |
| 5 | 21 | 2 | 0.500 | 0.028  | -0.384 | 0.3285 | 0.44319 | # | CA | - | OH |
| 5 | 22 | 2 | 0.500 | 0.028  | 0.362  | 0.1750 | 0.00000 | # | CA | - | HH |
| 6 | 11 | 2 | 0.500 | 0.133  | -0.110 | 0.3025 | 0.19173 | # | HA | - | CC |
| 6 | 12 | 2 | 0.500 | 0.133  | 0.100  | 0.2460 | 0.12552 | # | HA | - | HC |
| 6 | 13 | 2 | 0.500 | 0.133  | -0.109 | 0.3025 | 0.19173 | # | HA | - | CC |
| 6 | 14 | 2 | 0.500 | 0.133  | 0.102  | 0.2460 | 0.12552 | # | HA | - | HC |
| 6 | 15 | 2 | 0.500 | 0.133  | 0.073  | 0.3025 | 0.19173 | # | HA | - | CC |
| 6 | 16 | 2 | 0.500 | 0.133  | -0.395 | 0.2785 | 0.29880 | # | HA | - | OH |
| 6 | 17 | 2 | 0.500 | 0.133  | 0.340  | 0.1250 | 0.00000 | # | HA | - | HH |
| 6 | 18 | 2 | 0.500 | 0.133  | -0.108 | 0.3025 | 0.19173 | # | HA | - | CC |
| 6 | 19 | 2 | 0.500 | 0.133  | 0.111  | 0.2460 | 0.12552 | # | HA | - | HC |
| 6 | 20 | 2 | 0.500 | 0.133  | 0.068  | 0.3025 | 0.19173 | # | HA | - | CZ |
| 6 | 21 | 2 | 0.500 | 0.133  | -0.384 | 0.2785 | 0.29880 | # | HA | - | OH |
| 6 | 22 | 2 | 0.500 | 0.133  | 0.362  | 0.1250 | 0.00000 | # | HA | - | HH |
| 7 | 16 | 2 | 0.500 | -0.140 | -0.395 | 0.3285 | 0.44319 | # | CB | - | OH |
| 7 | 17 | 2 | 0.500 | -0.140 | 0.340  | 0.1750 | 0.00000 | # | CB | - | HH |
| 7 | 19 | 2 | 0.500 | -0.140 | 0.111  | 0.2960 | 0.18618 | # | CB | - | HC |
| 7 | 20 | 2 | 0.500 | -0.140 | 0.068  | 0.3525 | 0.28439 | # | CB | - | CZ |
| 7 | 21 | 2 | 0.500 | -0.140 | -0.384 | 0.3285 | 0.44319 | # | CB | - | OH |
| 7 | 22 | 2 | 0.500 | -0.140 | 0.362  | 0.1750 | 0.00000 | # | CB | - | HH |
| 8 | 12 | 2 | 0.500 | 0.103  | 0.100  | 0.2460 | 0.12552 | # | HA | - | HC |
| 8 | 14 | 2 | 0.500 | 0.103  | 0.102  | 0.2460 | 0.12552 | # | HA | - | HC |
| 8 | 15 | 2 | 0.500 | 0.103  | 0.073  | 0.3025 | 0.19173 | # | HA | - | CC |
| 8 | 16 | 2 | 0.500 | 0.103  | -0.395 | 0.2785 | 0.29880 | # | HA | - | OH |
| 8 | 17 | 2 | 0.500 | 0.103  | 0.340  | 0.1250 | 0.00000 | # | HA | - | HH |
| 8 | 18 | 2 | 0.500 | 0.103  | -0.108 | 0.3025 | 0.19173 | # | HA | - | CC |
| 8 | 19 | 2 | 0.500 | 0.103  | 0.111  | 0.2460 | 0.12552 | # | HA | - | HC |
| 8 | 20 | 2 | 0.500 | 0.103  | 0.068  | 0.3025 | 0.19173 | # | HA | - | CZ |
| 8 | 21 | 2 | 0.500 | 0.103  | -0.384 | 0.2785 | 0.29880 | # | HA | - | OH |
| 8 | 22 | 2 | 0.500 | 0.103  | 0.362  | 0.1250 | 0.00000 | # | HA | - | HH |
| 8 | 24 | 2 | 0.500 | 0.103  | -0.450 | 0.2730 | 0.33209 | # | HA | - | O  |
| 8 | 25 | 2 | 0.500 | 0.103  | -0.464 | 0.2730 | 0.33209 | # | HA | - | O  |
| 9 | 12 | 2 | 0.500 | 0.102  | 0.100  | 0.2460 | 0.12552 | # | HA | - | HC |
| 9 | 14 | 2 | 0.500 | 0.102  | 0.102  | 0.2460 | 0.12552 | # | HA | - | HC |
| 9 | 15 | 2 | 0.500 | 0.102  | 0.073  | 0.3025 | 0.19173 | # | HA | - | CC |
| 9 | 16 | 2 | 0.500 | 0.102  | -0.395 | 0.2785 | 0.29880 | # | HA | - | OH |
| 9 | 17 | 2 | 0.500 | 0.102  | 0.340  | 0.1250 | 0.00000 | # | HA | - | HH |
| 9 | 18 | 2 | 0.500 | 0.102  | -0.108 | 0.3025 | 0.19173 | # | HA | - | CC |
| 9 | 19 | 2 | 0.500 | 0.102  | 0.111  | 0.2460 | 0.12552 | # | HA | - | HC |

|    |    |   |       |        |        |        |         |   |    |   |    |
|----|----|---|-------|--------|--------|--------|---------|---|----|---|----|
| 9  | 20 | 2 | 0.500 | 0.102  | 0.068  | 0.3025 | 0.19173 | # | HA | - | CZ |
| 9  | 21 | 2 | 0.500 | 0.102  | -0.384 | 0.2785 | 0.29880 | # | HA | - | OH |
| 9  | 22 | 2 | 0.500 | 0.102  | 0.362  | 0.1250 | 0.00000 | # | HA | - | HH |
| 9  | 24 | 2 | 0.500 | 0.102  | -0.450 | 0.2730 | 0.33209 | # | HA | - | O  |
| 9  | 25 | 2 | 0.500 | 0.102  | -0.464 | 0.2730 | 0.33209 | # | HA | - | O  |
| 10 | 17 | 2 | 0.500 | -0.027 | 0.340  | 0.1775 | 0.00000 | # | CC | - | HH |
| 10 | 21 | 2 | 0.500 | -0.027 | -0.384 | 0.3310 | 0.45642 | # | CC | - | OH |
| 10 | 22 | 2 | 0.500 | -0.027 | 0.362  | 0.1775 | 0.00000 | # | CC | - | HH |
| 10 | 24 | 2 | 0.500 | -0.027 | -0.450 | 0.3255 | 0.50728 | # | CC | - | O  |
| 10 | 25 | 2 | 0.500 | -0.027 | -0.464 | 0.3255 | 0.50728 | # | CC | - | O  |
| 11 | 19 | 2 | 0.500 | -0.110 | 0.111  | 0.2985 | 0.19173 | # | CC | - | HC |
| 11 | 22 | 2 | 0.500 | -0.110 | 0.362  | 0.1775 | 0.00000 | # | CC | - | HH |
| 11 | 23 | 2 | 0.500 | -0.110 | 0.188  | 0.3650 | 0.35870 | # | CC | - | C  |
| 11 | 24 | 2 | 0.500 | -0.110 | -0.450 | 0.3255 | 0.50728 | # | CC | - | O  |
| 11 | 25 | 2 | 0.500 | -0.110 | -0.464 | 0.3255 | 0.50728 | # | CC | - | O  |
| 12 | 14 | 2 | 0.500 | 0.100  | 0.102  | 0.2420 | 0.12552 | # | HC | - | HC |
| 12 | 17 | 2 | 0.500 | 0.100  | 0.340  | 0.1210 | 0.00000 | # | HC | - | HH |
| 12 | 18 | 2 | 0.500 | 0.100  | -0.108 | 0.2985 | 0.19173 | # | HC | - | CC |
| 12 | 19 | 2 | 0.500 | 0.100  | 0.111  | 0.2420 | 0.12552 | # | HC | - | HC |
| 12 | 21 | 2 | 0.500 | 0.100  | -0.384 | 0.2745 | 0.29880 | # | HC | - | OH |
| 12 | 22 | 2 | 0.500 | 0.100  | 0.362  | 0.1210 | 0.00000 | # | HC | - | HH |
| 12 | 23 | 2 | 0.500 | 0.100  | 0.188  | 0.3085 | 0.23483 | # | HC | - | C  |
| 12 | 24 | 2 | 0.500 | 0.100  | -0.450 | 0.2690 | 0.33209 | # | HC | - | O  |
| 12 | 25 | 2 | 0.500 | 0.100  | -0.464 | 0.2690 | 0.33209 | # | HC | - | O  |
| 13 | 16 | 2 | 0.500 | -0.109 | -0.395 | 0.3310 | 0.45642 | # | CC | - | OH |
| 13 | 17 | 2 | 0.500 | -0.109 | 0.340  | 0.1775 | 0.00000 | # | CC | - | HH |
| 13 | 22 | 2 | 0.500 | -0.109 | 0.362  | 0.1775 | 0.00000 | # | CC | - | HH |
| 13 | 23 | 2 | 0.500 | -0.109 | 0.188  | 0.3650 | 0.35870 | # | CC | - | C  |
| 13 | 24 | 2 | 0.500 | -0.109 | -0.450 | 0.3255 | 0.50728 | # | CC | - | O  |
| 13 | 25 | 2 | 0.500 | -0.109 | -0.464 | 0.3255 | 0.50728 | # | CC | - | O  |
| 14 | 15 | 2 | 0.500 | 0.102  | 0.073  | 0.2985 | 0.19173 | # | HC | - | CC |
| 14 | 16 | 2 | 0.500 | 0.102  | -0.395 | 0.2745 | 0.29880 | # | HC | - | OH |
| 14 | 17 | 2 | 0.500 | 0.102  | 0.340  | 0.1210 | 0.00000 | # | HC | - | HH |
| 14 | 21 | 2 | 0.500 | 0.102  | -0.384 | 0.2745 | 0.29880 | # | HC | - | OH |
| 14 | 22 | 2 | 0.500 | 0.102  | 0.362  | 0.1210 | 0.00000 | # | HC | - | HH |
| 14 | 23 | 2 | 0.500 | 0.102  | 0.188  | 0.3085 | 0.23483 | # | HC | - | C  |
| 14 | 24 | 2 | 0.500 | 0.102  | -0.450 | 0.2690 | 0.33209 | # | HC | - | O  |
| 14 | 25 | 2 | 0.500 | 0.102  | -0.464 | 0.2690 | 0.33209 | # | HC | - | O  |
| 15 | 23 | 2 | 0.500 | 0.073  | 0.188  | 0.3650 | 0.35870 | # | CC | - | C  |
| 15 | 24 | 2 | 0.500 | 0.073  | -0.450 | 0.3255 | 0.50728 | # | CC | - | O  |
| 15 | 25 | 2 | 0.500 | 0.073  | -0.464 | 0.3255 | 0.50728 | # | CC | - | O  |
| 16 | 19 | 2 | 0.500 | -0.395 | 0.111  | 0.2745 | 0.29880 | # | OH | - | HC |
| 16 | 22 | 2 | 0.500 | -0.395 | 0.362  | 0.1535 | 0.00000 | # | OH | - | HH |
| 16 | 23 | 2 | 0.500 | -0.395 | 0.188  | 0.3410 | 0.55900 | # | OH | - | C  |
| 16 | 24 | 2 | 0.500 | -0.395 | -0.450 | 0.3015 | 0.79054 | # | OH | - | O  |
| 16 | 25 | 2 | 0.500 | -0.395 | -0.464 | 0.3015 | 0.79054 | # | OH | - | O  |
| 17 | 18 | 2 | 0.500 | 0.340  | -0.108 | 0.1775 | 0.00000 | # | HH | - | CC |
| 17 | 19 | 2 | 0.500 | 0.340  | 0.111  | 0.1210 | 0.00000 | # | HH | - | HC |
| 17 | 21 | 2 | 0.500 | 0.340  | -0.384 | 0.1535 | 0.00000 | # | HH | - | OH |
| 17 | 22 | 2 | 0.500 | 0.340  | 0.362  | 0.0000 | 0.00000 | # | HH | - | HH |
| 17 | 23 | 2 | 0.500 | 0.340  | 0.188  | 0.1875 | 0.00000 | # | HH | - | C  |
| 17 | 24 | 2 | 0.500 | 0.340  | -0.450 | 0.1480 | 0.00000 | # | HH | - | O  |
| 17 | 25 | 2 | 0.500 | 0.340  | -0.464 | 0.1480 | 0.00000 | # | HH | - | O  |
| 18 | 23 | 2 | 0.500 | -0.108 | 0.188  | 0.3650 | 0.35870 | # | CC | - | C  |
| 18 | 24 | 2 | 0.500 | -0.108 | -0.450 | 0.3255 | 0.50728 | # | CC | - | O  |
| 18 | 25 | 2 | 0.500 | -0.108 | -0.464 | 0.3255 | 0.50728 | # | CC | - | O  |
| 19 | 22 | 2 | 0.500 | 0.111  | 0.362  | 0.1210 | 0.00000 | # | HC | - | HH |
| 19 | 23 | 2 | 0.500 | 0.111  | 0.188  | 0.3085 | 0.23483 | # | HC | - | C  |
| 19 | 24 | 2 | 0.500 | 0.111  | -0.450 | 0.2690 | 0.33209 | # | HC | - | O  |
| 19 | 25 | 2 | 0.500 | 0.111  | -0.464 | 0.2690 | 0.33209 | # | HC | - | O  |

|    |    |   |       |        |        |        |         |          |
|----|----|---|-------|--------|--------|--------|---------|----------|
| 20 | 23 | 2 | 0.500 | 0.068  | 0.188  | 0.3650 | 0.35870 | # CZ - C |
| 20 | 24 | 2 | 0.500 | 0.068  | -0.450 | 0.3255 | 0.50728 | # CZ - O |
| 20 | 25 | 2 | 0.500 | 0.068  | -0.464 | 0.3255 | 0.50728 | # CZ - O |
| 21 | 23 | 2 | 0.500 | -0.384 | 0.188  | 0.3410 | 0.55900 | # OH - C |
| 21 | 24 | 2 | 0.500 | -0.384 | -0.450 | 0.3015 | 0.79054 | # OH - O |
| 21 | 25 | 2 | 0.500 | -0.384 | -0.464 | 0.3015 | 0.79054 | # OH - O |
| 22 | 23 | 2 | 0.500 | 0.362  | 0.188  | 0.1875 | 0.00000 | # HH - C |
| 22 | 24 | 2 | 0.500 | 0.362  | -0.450 | 0.1480 | 0.00000 | # HH - O |
| 22 | 25 | 2 | 0.500 | 0.362  | -0.464 | 0.1480 | 0.00000 | # HH - O |

; Exclusions from default nonbonded

[ exclusions ]

; ai aj

|   |    |
|---|----|
| 1 | 2  |
| 1 | 3  |
| 1 | 4  |
| 1 | 5  |
| 1 | 6  |
| 1 | 7  |
| 1 | 8  |
| 1 | 9  |
| 1 | 10 |
| 1 | 11 |
| 1 | 12 |
| 1 | 13 |
| 1 | 14 |
| 1 | 15 |
| 1 | 16 |
| 1 | 17 |
| 1 | 18 |
| 1 | 19 |
| 1 | 20 |
| 1 | 21 |
| 1 | 22 |
| 1 | 23 |
| 1 | 24 |
| 1 | 25 |
| 2 | 3  |
| 2 | 4  |
| 2 | 5  |
| 2 | 6  |
| 2 | 7  |
| 2 | 8  |
| 2 | 9  |
| 2 | 10 |
| 2 | 11 |
| 2 | 12 |
| 2 | 13 |
| 2 | 14 |
| 2 | 15 |
| 2 | 16 |
| 2 | 17 |
| 2 | 18 |
| 2 | 19 |
| 2 | 20 |
| 2 | 21 |
| 2 | 22 |
| 2 | 23 |
| 2 | 24 |
| 2 | 25 |

3 4  
3 5  
3 6  
3 7  
3 8  
3 9  
3 10  
3 11  
3 12  
3 13  
3 14  
3 15  
3 16  
3 17  
3 18  
3 19  
3 20  
3 21  
3 22  
3 23  
3 24  
3 25  
4 5  
4 6  
4 7  
4 8  
4 9  
4 10  
4 11  
4 12  
4 13  
4 14  
4 15  
4 16  
4 17  
4 18  
4 19  
4 20  
4 21  
4 22  
4 23  
4 24  
4 25  
5 6  
5 7  
5 8  
5 9  
5 10  
5 11  
5 12  
5 13  
5 14  
5 15  
5 16  
5 17  
5 18  
5 19  
5 20  
5 21  
5 22

5 23  
5 24  
5 25  
6 7  
6 8  
6 9  
6 10  
6 11  
6 12  
6 13  
6 14  
6 15  
6 16  
6 17  
6 18  
6 19  
6 20  
6 21  
6 22  
6 23  
6 24  
6 25  
7 8  
7 9  
7 10  
7 11  
7 12  
7 13  
7 14  
7 15  
7 16  
7 17  
7 18  
7 19  
7 20  
7 21  
7 22  
7 23  
7 24  
7 25  
8 9  
8 10  
8 11  
8 12  
8 13  
8 14  
8 15  
8 16  
8 17  
8 18  
8 19  
8 20  
8 21  
8 22  
8 23  
8 24  
8 25  
9 10  
9 11  
9 12

9 13  
9 14  
9 15  
9 16  
9 17  
9 18  
9 19  
9 20  
9 21  
9 22  
9 23  
9 24  
9 25  
10 11  
10 12  
10 13  
10 14  
10 15  
10 16  
10 17  
10 18  
10 19  
10 20  
10 21  
10 22  
10 23  
10 24  
10 25  
11 12  
11 13  
11 14  
11 15  
11 16  
11 17  
11 18  
11 19  
11 20  
11 21  
11 22  
11 23  
11 24  
11 25  
12 13  
12 14  
12 15  
12 16  
12 17  
12 18  
12 19  
12 20  
12 21  
12 22  
12 23  
12 24  
12 25  
13 14  
13 15  
13 16  
13 17  
13 18

13 19  
13 20  
13 21  
13 22  
13 23  
13 24  
13 25  
14 15  
14 16  
14 17  
14 18  
14 19  
14 20  
14 21  
14 22  
14 23  
14 24  
14 25  
15 16  
15 17  
15 18  
15 19  
15 20  
15 21  
15 22  
15 23  
15 24  
15 25  
16 17  
16 18  
16 19  
16 20  
16 21  
16 22  
16 23  
16 24  
16 25  
17 18  
17 19  
17 20  
17 21  
17 22  
17 23  
17 24  
17 25  
18 19  
18 20  
18 21  
18 22  
18 23  
18 24  
18 25  
19 20  
19 21  
19 22  
19 23  
19 24  
19 25  
20 21  
20 22

20 23  
20 24  
20 25  
21 22  
21 23  
21 24  
21 25  
22 23  
22 24  
22 25  
23 24  
23 25  
24 25

## droxidopa.itp

; OPLS AA force field parameters of Droxidopa generated with JOYCE

[ moleculetype ]

; Name nrexcl

DRO 3

[ atoms ]

; nr type resnr residue atom cgnr charge mass typeB chargeB

; residue 1 DRO rtp DRO q +0.0

|    |           |   |     |     |   |           |         |  |                 |
|----|-----------|---|-----|-----|---|-----------|---------|--|-----------------|
| 1  | oplsm_287 | 1 | DRO | N   | 1 | -0.563874 | 14.0027 |  |                 |
| 2  | oplsm_290 | 1 | DRO | H1  | 1 | 0.334884  | 1.008   |  |                 |
| 3  | oplsm_290 | 1 | DRO | H2  | 1 | 0.383193  | 1.008   |  |                 |
| 4  | oplsm_290 | 1 | DRO | H3  | 1 | 0.347978  | 1.008   |  |                 |
| 5  | oplsm_293 | 1 | DRO | CA  | 1 | 0.025501  | 12.011  |  |                 |
| 6  | oplsm_140 | 1 | DRO | HA  | 1 | 0.138072  | 1.008   |  |                 |
| 7  | oplsm_149 | 1 | DRO | CB  | 2 | 0.018493  | 12.011  |  |                 |
| 8  | oplsm_140 | 1 | DRO | HB1 | 2 | 0.112580  | 1.008   |  |                 |
| 9  | oplsm_154 | 1 | DRO | OG  | 3 | -0.469561 | 15.9994 |  |                 |
| 10 | oplsm_155 | 1 | DRO | HG  | 3 | 0.286741  | 1.008   |  |                 |
| 11 | oplsm_145 | 1 | DRO | CG  | 3 | -0.037767 | 12.011  |  |                 |
| 12 | oplsm_145 | 1 | DRO | CD1 | 4 | -0.106979 | 12.011  |  |                 |
| 13 | oplsm_146 | 1 | DRO | HD1 | 4 | 0.113467  | 1.008   |  |                 |
| 14 | oplsm_145 | 1 | DRO | CD2 | 5 | -0.106878 | 12.011  |  |                 |
| 15 | oplsm_146 | 1 | DRO | HD2 | 5 | 0.096655  | 1.008   |  |                 |
| 16 | oplsm_166 | 1 | DRO | CE1 | 6 | 0.071455  | 12.011  |  |                 |
| 17 | oplsm_167 | 1 | DRO | OE1 | 6 | -0.382444 | 15.9994 |  |                 |
| 18 | oplsm_168 | 1 | DRO | HE1 | 6 | 0.363284  | 1.008   |  |                 |
| 19 | oplsm_145 | 1 | DRO | CE2 | 7 | -0.103248 | 12.011  |  |                 |
| 20 | oplsm_146 | 1 | DRO | HE2 | 7 | 0.108686  | 1.008   |  |                 |
| 21 | oplsm_166 | 1 | DRO | CZ  | 8 | 0.073032  | 12.011  |  |                 |
| 22 | oplsm_167 | 1 | DRO | OH  | 8 | -0.393531 | 15.9994 |  |                 |
| 23 | oplsm_168 | 1 | DRO | HH  | 8 | 0.341308  | 1.008   |  |                 |
| 24 | oplsm_271 | 1 | DRO | C   | 9 | 0.201167  | 12.011  |  |                 |
| 25 | oplsm_272 | 1 | DRO | O1  | 9 | -0.421581 | 15.9994 |  |                 |
| 26 | oplsm_272 | 1 | DRO | O2  | 9 | -0.430621 | 15.9994 |  | ; qtot 0.000013 |

; Stretchings

[ bonds ]

|    |    |   |        |            |
|----|----|---|--------|------------|
| 1  | 2  | 1 | 0.1048 | 373470.846 |
| 1  | 3  | 1 | 0.1021 | 373470.846 |
| 1  | 4  | 1 | 0.1027 | 373470.846 |
| 1  | 5  | 1 | 0.1499 | 207081.212 |
| 5  | 6  | 1 | 0.1096 | 317299.775 |
| 5  | 7  | 1 | 0.1551 | 154162.502 |
| 7  | 8  | 1 | 0.1099 | 305252.010 |
| 7  | 9  | 1 | 0.1420 | 225968.096 |
| 9  | 10 | 1 | 0.0987 | 383776.997 |
| 7  | 11 | 1 | 0.1520 | 208485.422 |
| 11 | 12 | 1 | 0.1404 | 316021.400 |
| 12 | 13 | 1 | 0.1093 | 332268.673 |
| 11 | 14 | 1 | 0.1401 | 316021.400 |
| 14 | 15 | 1 | 0.1089 | 332268.673 |
| 12 | 16 | 1 | 0.1395 | 316021.400 |
| 16 | 17 | 1 | 0.1372 | 289583.572 |
| 17 | 18 | 1 | 0.0966 | 481033.117 |
| 14 | 19 | 1 | 0.1396 | 316021.400 |
| 19 | 20 | 1 | 0.1090 | 332268.673 |
| 16 | 21 | 1 | 0.1404 | 321359.557 |

|    |    |   |        |            |
|----|----|---|--------|------------|
| 19 | 21 | 1 | 0.1395 | 321359.557 |
| 21 | 22 | 1 | 0.1367 | 309471.243 |
| 22 | 23 | 1 | 0.0969 | 481033.117 |
| 5  | 24 | 1 | 0.1558 | 132339.541 |
| 24 | 25 | 1 | 0.1259 | 479501.584 |
| 24 | 26 | 1 | 0.1257 | 479501.584 |

; Bendings

[ angles ]

|    |    |    |   |        |          |
|----|----|----|---|--------|----------|
| 2  | 1  | 3  | 1 | 111.49 | 343.4745 |
| 2  | 1  | 4  | 1 | 108.24 | 343.4745 |
| 2  | 1  | 5  | 1 | 102.59 | 361.7045 |
| 3  | 1  | 4  | 1 | 108.69 | 343.4745 |
| 3  | 1  | 5  | 1 | 114.05 | 361.7045 |
| 4  | 1  | 5  | 1 | 111.56 | 361.7045 |
| 1  | 5  | 6  | 1 | 107.66 | 519.9423 |
| 1  | 5  | 7  | 1 | 111.87 | 553.7967 |
| 1  | 5  | 24 | 1 | 105.89 | 484.0496 |
| 6  | 5  | 7  | 1 | 108.85 | 417.8032 |
| 6  | 5  | 24 | 1 | 107.90 | 291.6417 |
| 5  | 7  | 8  | 1 | 107.60 | 419.7621 |
| 5  | 7  | 9  | 1 | 108.48 | 744.6744 |
| 5  | 7  | 11 | 1 | 111.66 | 365.0700 |
| 7  | 5  | 24 | 1 | 114.39 | 468.9387 |
| 8  | 7  | 9  | 1 | 106.95 | 492.3242 |
| 8  | 7  | 11 | 1 | 107.98 | 276.5572 |
| 7  | 9  | 10 | 1 | 105.60 | 632.6532 |
| 9  | 7  | 11 | 1 | 113.89 | 449.8951 |
| 7  | 11 | 12 | 1 | 119.34 | 687.2295 |
| 7  | 11 | 14 | 1 | 121.60 | 687.2295 |
| 11 | 12 | 13 | 1 | 120.26 | 298.4541 |
| 12 | 11 | 14 | 1 | 119.01 | 496.0446 |
| 11 | 12 | 16 | 1 | 120.54 | 496.0446 |
| 13 | 12 | 16 | 1 | 119.19 | 298.4541 |
| 11 | 14 | 15 | 1 | 120.01 | 298.4541 |
| 11 | 14 | 19 | 1 | 120.51 | 496.0446 |
| 15 | 14 | 19 | 1 | 119.48 | 298.4541 |
| 12 | 16 | 17 | 1 | 124.40 | 731.9646 |
| 12 | 16 | 21 | 1 | 120.09 | 377.2683 |
| 16 | 17 | 18 | 1 | 110.69 | 453.9904 |
| 17 | 16 | 21 | 1 | 115.50 | 634.4644 |
| 14 | 19 | 20 | 1 | 120.87 | 298.4541 |
| 14 | 19 | 21 | 1 | 120.33 | 377.2683 |
| 20 | 19 | 21 | 1 | 118.80 | 323.2446 |
| 16 | 21 | 19 | 1 | 119.52 | 209.4400 |
| 16 | 21 | 22 | 1 | 120.77 | 671.0560 |
| 19 | 21 | 22 | 1 | 119.71 | 671.0560 |
| 21 | 22 | 23 | 1 | 108.62 | 481.9262 |
| 5  | 24 | 25 | 1 | 116.12 | 324.2452 |
| 5  | 24 | 26 | 1 | 115.50 | 324.2452 |
| 25 | 24 | 26 | 1 | 128.37 | 813.2475 |

; Torsions

[ dihedrals ]

|    |    |    |    |   |        |        |   |
|----|----|----|----|---|--------|--------|---|
| 6  | 5  | 24 | 25 | 1 | 328.39 | 10.451 | 2 |
| 6  | 5  | 24 | 26 | 1 | 330.59 | 10.451 | 2 |
| 2  | 1  | 5  | 6  | 1 | 125.59 | 2.547  | 3 |
| 3  | 1  | 5  | 6  | 1 | 123.45 | 2.547  | 3 |
| 19 | 21 | 22 | 23 | 1 | 359.86 | 3.272  | 1 |
| 19 | 21 | 22 | 23 | 1 | 179.73 | 8.853  | 2 |

|    |    |    |    |   |         |        |   |
|----|----|----|----|---|---------|--------|---|
| 6  | 5  | 7  | 8  | 1 | -218.42 | 3.367  | 1 |
| 6  | 5  | 7  | 8  | 1 | -87.74  | 9.305  | 2 |
| 6  | 5  | 7  | 8  | 1 | -25.06  | 9.134  | 3 |
| 6  | 5  | 7  | 8  | 1 | -144.67 | 0.009  | 4 |
| 8  | 7  | 11 | 14 | 1 | -120.90 | 0.702  | 1 |
| 8  | 7  | 11 | 14 | 1 | 185.55  | 10.437 | 2 |
| 8  | 7  | 11 | 14 | 1 | 41.83   | 0.182  | 3 |
| 8  | 7  | 11 | 14 | 1 | 0.00    | 0.042  | 4 |
| 8  | 7  | 11 | 12 | 1 | -120.90 | 0.702  | 1 |
| 8  | 7  | 11 | 12 | 1 | 185.55  | 10.437 | 2 |
| 8  | 7  | 11 | 12 | 1 | 41.83   | 0.182  | 3 |
| 8  | 7  | 11 | 12 | 1 | 0.00    | 0.042  | 4 |
| 12 | 16 | 17 | 18 | 1 | 0.00    | 3.272  | 1 |
| 12 | 16 | 17 | 18 | 1 | 179.99  | 8.853  | 2 |
| 5  | 7  | 9  | 10 | 1 | -215.05 | 12.202 | 1 |
| 5  | 7  | 9  | 10 | 1 | 128.96  | 6.720  | 2 |
| 5  | 7  | 9  | 10 | 1 | 777.43  | 2.465  | 3 |
| 5  | 7  | 9  | 10 | 1 | 43.77   | 0.432  | 4 |

; Nonbonded terms

[ pairs ]

; 1-4 interactions

|    |    |   |       |        |        |        |         |      |      |
|----|----|---|-------|--------|--------|--------|---------|------|------|
| 1  | 8  | 2 | 0.500 | -0.564 | 0.113  | 0.2875 | 0.14940 | # N  | - HA |
| 1  | 9  | 2 | 0.500 | -0.564 | -0.470 | 0.3160 | 0.35564 | # N  | - OH |
| 1  | 11 | 2 | 0.500 | -0.564 | -0.038 | 0.3400 | 0.22821 | # N  | - CC |
| 1  | 25 | 2 | 0.500 | -0.564 | -0.422 | 0.3105 | 0.39527 | # N  | - O  |
| 1  | 26 | 2 | 0.500 | -0.564 | -0.431 | 0.3105 | 0.39527 | # N  | - O  |
| 2  | 6  | 2 | 0.500 | 0.335  | 0.138  | 0.1250 | 0.00000 | # H  | - HA |
| 2  | 7  | 2 | 0.500 | 0.335  | 0.018  | 0.1750 | 0.00000 | # H  | - CB |
| 2  | 24 | 2 | 0.500 | 0.335  | 0.201  | 0.1875 | 0.00000 | # H  | - C  |
| 3  | 6  | 2 | 0.500 | 0.383  | 0.138  | 0.1250 | 0.00000 | # H  | - HA |
| 3  | 7  | 2 | 0.500 | 0.383  | 0.018  | 0.1750 | 0.00000 | # H  | - CB |
| 3  | 24 | 2 | 0.500 | 0.383  | 0.201  | 0.1875 | 0.00000 | # H  | - C  |
| 4  | 6  | 2 | 0.500 | 0.348  | 0.138  | 0.1250 | 0.00000 | # H  | - HA |
| 4  | 7  | 2 | 0.500 | 0.348  | 0.018  | 0.1750 | 0.00000 | # H  | - CB |
| 4  | 24 | 2 | 0.500 | 0.348  | 0.201  | 0.1875 | 0.00000 | # H  | - C  |
| 5  | 10 | 2 | 0.500 | 0.026  | 0.287  | 0.1750 | 0.00000 | # CA | - HO |
| 5  | 12 | 2 | 0.500 | 0.026  | -0.107 | 0.3525 | 0.14219 | # CA | - CC |
| 5  | 14 | 2 | 0.500 | 0.026  | -0.107 | 0.3525 | 0.14219 | # CA | - CC |
| 6  | 8  | 2 | 0.500 | 0.138  | 0.113  | 0.2500 | 0.06276 | # HA | - HA |
| 6  | 9  | 2 | 0.500 | 0.138  | -0.470 | 0.2785 | 0.14940 | # HA | - OH |
| 6  | 11 | 2 | 0.500 | 0.138  | -0.038 | 0.3025 | 0.09587 | # HA | - CC |
| 6  | 25 | 2 | 0.500 | 0.138  | -0.422 | 0.2730 | 0.16605 | # HA | - O  |
| 6  | 26 | 2 | 0.500 | 0.138  | -0.431 | 0.2730 | 0.16605 | # HA | - O  |
| 7  | 13 | 2 | 0.500 | 0.018  | 0.113  | 0.2960 | 0.09309 | # CB | - HC |
| 7  | 15 | 2 | 0.500 | 0.018  | 0.097  | 0.2960 | 0.09309 | # CB | - HC |
| 7  | 16 | 2 | 0.500 | 0.018  | 0.071  | 0.3525 | 0.14219 | # CB | - CC |
| 7  | 19 | 2 | 0.500 | 0.018  | -0.103 | 0.3525 | 0.14219 | # CB | - CC |
| 7  | 25 | 2 | 0.500 | 0.018  | -0.422 | 0.3230 | 0.24629 | # CB | - O  |
| 7  | 26 | 2 | 0.500 | 0.018  | -0.431 | 0.3230 | 0.24629 | # CB | - O  |
| 8  | 10 | 2 | 0.500 | 0.113  | 0.287  | 0.1250 | 0.00000 | # HA | - HO |
| 8  | 12 | 2 | 0.500 | 0.113  | -0.107 | 0.3025 | 0.09587 | # HA | - CC |
| 8  | 14 | 2 | 0.500 | 0.113  | -0.107 | 0.3025 | 0.09587 | # HA | - CC |
| 8  | 24 | 2 | 0.500 | 0.113  | 0.201  | 0.3125 | 0.11741 | # HA | - C  |
| 9  | 12 | 2 | 0.500 | -0.470 | -0.107 | 0.3310 | 0.22821 | # OH | - CC |
| 9  | 14 | 2 | 0.500 | -0.470 | -0.107 | 0.3310 | 0.22821 | # OH | - CC |
| 9  | 24 | 2 | 0.500 | -0.470 | 0.201  | 0.3410 | 0.27950 | # OH | - C  |
| 10 | 11 | 2 | 0.500 | 0.287  | -0.038 | 0.1775 | 0.00000 | # HO | - CC |
| 11 | 17 | 2 | 0.500 | -0.038 | -0.382 | 0.3310 | 0.22821 | # CC | - OH |
| 11 | 20 | 2 | 0.500 | -0.038 | 0.109  | 0.2985 | 0.09587 | # CC | - HC |

|    |    |   |       |        |        |        |         |   |    |      |
|----|----|---|-------|--------|--------|--------|---------|---|----|------|
| 11 | 21 | 2 | 0.500 | -0.038 | 0.073  | 0.3550 | 0.14644 | # | CC | - CZ |
| 11 | 24 | 2 | 0.500 | -0.038 | 0.201  | 0.3650 | 0.17935 | # | CC | - C  |
| 12 | 15 | 2 | 0.500 | -0.107 | 0.097  | 0.2985 | 0.09587 | # | CC | - HC |
| 12 | 18 | 2 | 0.500 | -0.107 | 0.363  | 0.1775 | 0.00000 | # | CC | - HH |
| 12 | 19 | 2 | 0.500 | -0.107 | -0.103 | 0.3550 | 0.14644 | # | CC | - CC |
| 12 | 22 | 2 | 0.500 | -0.107 | -0.394 | 0.3310 | 0.22821 | # | CC | - OH |
| 13 | 14 | 2 | 0.500 | 0.113  | -0.107 | 0.2985 | 0.09587 | # | HC | - CC |
| 13 | 17 | 2 | 0.500 | 0.113  | -0.382 | 0.2745 | 0.14940 | # | HC | - OH |
| 13 | 21 | 2 | 0.500 | 0.113  | 0.073  | 0.2985 | 0.09587 | # | HC | - CZ |
| 14 | 16 | 2 | 0.500 | -0.107 | 0.071  | 0.3550 | 0.14644 | # | CC | - CC |
| 14 | 22 | 2 | 0.500 | -0.107 | -0.394 | 0.3310 | 0.22821 | # | CC | - OH |
| 15 | 20 | 2 | 0.500 | 0.097  | 0.109  | 0.2420 | 0.06276 | # | HC | - HC |
| 15 | 21 | 2 | 0.500 | 0.097  | 0.073  | 0.2985 | 0.09587 | # | HC | - CZ |
| 16 | 20 | 2 | 0.500 | 0.071  | 0.109  | 0.2985 | 0.09587 | # | CC | - HC |
| 16 | 23 | 2 | 0.500 | 0.071  | 0.341  | 0.1775 | 0.00000 | # | CC | - HH |
| 17 | 19 | 2 | 0.500 | -0.382 | -0.103 | 0.3310 | 0.22821 | # | OH | - CC |
| 17 | 22 | 2 | 0.500 | -0.382 | -0.394 | 0.3070 | 0.35564 | # | OH | - OH |
| 18 | 21 | 2 | 0.500 | 0.363  | 0.073  | 0.1775 | 0.00000 | # | HH | - CZ |
| 19 | 23 | 2 | 0.500 | -0.103 | 0.341  | 0.1775 | 0.00000 | # | CC | - HH |
| 20 | 22 | 2 | 0.500 | 0.109  | -0.394 | 0.2745 | 0.14940 | # | HC | - OH |
| 1  | 10 | 2 | 0.500 | -0.564 | 0.287  | 0.1625 | 0.00000 | # | N  | - HO |
| 1  | 12 | 2 | 0.500 | -0.564 | -0.107 | 0.3400 | 0.45642 | # | N  | - CC |
| 1  | 13 | 2 | 0.500 | -0.564 | 0.113  | 0.2835 | 0.29880 | # | N  | - HC |
| 1  | 14 | 2 | 0.500 | -0.564 | -0.107 | 0.3400 | 0.45642 | # | N  | - CC |
| 1  | 15 | 2 | 0.500 | -0.564 | 0.097  | 0.2835 | 0.29880 | # | N  | - HC |
| 1  | 16 | 2 | 0.500 | -0.564 | 0.071  | 0.3400 | 0.45642 | # | N  | - CC |
| 1  | 17 | 2 | 0.500 | -0.564 | -0.382 | 0.3160 | 0.71128 | # | N  | - OH |
| 1  | 18 | 2 | 0.500 | -0.564 | 0.363  | 0.1625 | 0.00000 | # | N  | - HH |
| 1  | 19 | 2 | 0.500 | -0.564 | -0.103 | 0.3400 | 0.45642 | # | N  | - CC |
| 1  | 20 | 2 | 0.500 | -0.564 | 0.109  | 0.2835 | 0.29880 | # | N  | - HC |
| 1  | 21 | 2 | 0.500 | -0.564 | 0.073  | 0.3400 | 0.45642 | # | N  | - CZ |
| 1  | 22 | 2 | 0.500 | -0.564 | -0.394 | 0.3160 | 0.71128 | # | N  | - OH |
| 1  | 23 | 2 | 0.500 | -0.564 | 0.341  | 0.1625 | 0.00000 | # | N  | - HH |
| 2  | 8  | 2 | 0.500 | 0.335  | 0.113  | 0.1250 | 0.00000 | # | H  | - HA |
| 2  | 9  | 2 | 0.500 | 0.335  | -0.470 | 0.1535 | 0.00000 | # | H  | - OH |
| 2  | 10 | 2 | 0.500 | 0.335  | 0.287  | 0.0000 | 0.00000 | # | H  | - HO |
| 2  | 11 | 2 | 0.500 | 0.335  | -0.038 | 0.1775 | 0.00000 | # | H  | - CC |
| 2  | 12 | 2 | 0.500 | 0.335  | -0.107 | 0.1775 | 0.00000 | # | H  | - CC |
| 2  | 13 | 2 | 0.500 | 0.335  | 0.113  | 0.1210 | 0.00000 | # | H  | - HC |
| 2  | 14 | 2 | 0.500 | 0.335  | -0.107 | 0.1775 | 0.00000 | # | H  | - CC |
| 2  | 15 | 2 | 0.500 | 0.335  | 0.097  | 0.1210 | 0.00000 | # | H  | - HC |
| 2  | 16 | 2 | 0.500 | 0.335  | 0.071  | 0.1775 | 0.00000 | # | H  | - CC |
| 2  | 17 | 2 | 0.500 | 0.335  | -0.382 | 0.1535 | 0.00000 | # | H  | - OH |
| 2  | 18 | 2 | 0.500 | 0.335  | 0.363  | 0.0000 | 0.00000 | # | H  | - HH |
| 2  | 19 | 2 | 0.500 | 0.335  | -0.103 | 0.1775 | 0.00000 | # | H  | - CC |
| 2  | 20 | 2 | 0.500 | 0.335  | 0.109  | 0.1210 | 0.00000 | # | H  | - HC |
| 2  | 21 | 2 | 0.500 | 0.335  | 0.073  | 0.1775 | 0.00000 | # | H  | - CZ |
| 2  | 22 | 2 | 0.500 | 0.335  | -0.394 | 0.1535 | 0.00000 | # | H  | - OH |
| 2  | 23 | 2 | 0.500 | 0.335  | 0.341  | 0.0000 | 0.00000 | # | H  | - HH |
| 2  | 25 | 2 | 0.500 | 0.335  | -0.422 | 0.1480 | 0.00000 | # | H  | - O  |
| 2  | 26 | 2 | 0.500 | 0.335  | -0.431 | 0.1480 | 0.00000 | # | H  | - O  |
| 3  | 8  | 2 | 0.500 | 0.383  | 0.113  | 0.1250 | 0.00000 | # | H  | - HA |
| 3  | 9  | 2 | 0.500 | 0.383  | -0.470 | 0.1535 | 0.00000 | # | H  | - OH |
| 3  | 10 | 2 | 0.500 | 0.383  | 0.287  | 0.0000 | 0.00000 | # | H  | - HO |
| 3  | 11 | 2 | 0.500 | 0.383  | -0.038 | 0.1775 | 0.00000 | # | H  | - CC |
| 3  | 12 | 2 | 0.500 | 0.383  | -0.107 | 0.1775 | 0.00000 | # | H  | - CC |
| 3  | 13 | 2 | 0.500 | 0.383  | 0.113  | 0.1210 | 0.00000 | # | H  | - HC |
| 3  | 14 | 2 | 0.500 | 0.383  | -0.107 | 0.1775 | 0.00000 | # | H  | - CC |
| 3  | 15 | 2 | 0.500 | 0.383  | 0.097  | 0.1210 | 0.00000 | # | H  | - HC |
| 3  | 16 | 2 | 0.500 | 0.383  | 0.071  | 0.1775 | 0.00000 | # | H  | - CC |

|   |    |   |       |       |        |        |         |           |
|---|----|---|-------|-------|--------|--------|---------|-----------|
| 3 | 17 | 2 | 0.500 | 0.383 | -0.382 | 0.1535 | 0.00000 | # H - OH  |
| 3 | 18 | 2 | 0.500 | 0.383 | 0.363  | 0.0000 | 0.00000 | # H - HH  |
| 3 | 19 | 2 | 0.500 | 0.383 | -0.103 | 0.1775 | 0.00000 | # H - CC  |
| 3 | 20 | 2 | 0.500 | 0.383 | 0.109  | 0.1210 | 0.00000 | # H - HC  |
| 3 | 21 | 2 | 0.500 | 0.383 | 0.073  | 0.1775 | 0.00000 | # H - CZ  |
| 3 | 22 | 2 | 0.500 | 0.383 | -0.394 | 0.1535 | 0.00000 | # H - OH  |
| 3 | 23 | 2 | 0.500 | 0.383 | 0.341  | 0.0000 | 0.00000 | # H - HH  |
| 3 | 25 | 2 | 0.500 | 0.383 | -0.422 | 0.1480 | 0.00000 | # H - O   |
| 3 | 26 | 2 | 0.500 | 0.383 | -0.431 | 0.1480 | 0.00000 | # H - O   |
| 4 | 8  | 2 | 0.500 | 0.348 | 0.113  | 0.1250 | 0.00000 | # H - HA  |
| 4 | 9  | 2 | 0.500 | 0.348 | -0.470 | 0.1535 | 0.00000 | # H - OH  |
| 4 | 10 | 2 | 0.500 | 0.348 | 0.287  | 0.0000 | 0.00000 | # H - HO  |
| 4 | 11 | 2 | 0.500 | 0.348 | -0.038 | 0.1775 | 0.00000 | # H - CC  |
| 4 | 12 | 2 | 0.500 | 0.348 | -0.107 | 0.1775 | 0.00000 | # H - CC  |
| 4 | 13 | 2 | 0.500 | 0.348 | 0.113  | 0.1210 | 0.00000 | # H - HC  |
| 4 | 14 | 2 | 0.500 | 0.348 | -0.107 | 0.1775 | 0.00000 | # H - CC  |
| 4 | 15 | 2 | 0.500 | 0.348 | 0.097  | 0.1210 | 0.00000 | # H - HC  |
| 4 | 16 | 2 | 0.500 | 0.348 | 0.071  | 0.1775 | 0.00000 | # H - CC  |
| 4 | 17 | 2 | 0.500 | 0.348 | -0.382 | 0.1535 | 0.00000 | # H - OH  |
| 4 | 18 | 2 | 0.500 | 0.348 | 0.363  | 0.0000 | 0.00000 | # H - HH  |
| 4 | 19 | 2 | 0.500 | 0.348 | -0.103 | 0.1775 | 0.00000 | # H - CC  |
| 4 | 20 | 2 | 0.500 | 0.348 | 0.109  | 0.1210 | 0.00000 | # H - HC  |
| 4 | 21 | 2 | 0.500 | 0.348 | 0.073  | 0.1775 | 0.00000 | # H - CZ  |
| 4 | 22 | 2 | 0.500 | 0.348 | -0.394 | 0.1535 | 0.00000 | # H - OH  |
| 4 | 23 | 2 | 0.500 | 0.348 | 0.341  | 0.0000 | 0.00000 | # H - HH  |
| 4 | 25 | 2 | 0.500 | 0.348 | -0.422 | 0.1480 | 0.00000 | # H - O   |
| 4 | 26 | 2 | 0.500 | 0.348 | -0.431 | 0.1480 | 0.00000 | # H - O   |
| 5 | 13 | 2 | 0.500 | 0.026 | 0.113  | 0.2960 | 0.18618 | # CA - HC |
| 5 | 15 | 2 | 0.500 | 0.026 | 0.097  | 0.2960 | 0.18618 | # CA - HC |
| 5 | 16 | 2 | 0.500 | 0.026 | 0.071  | 0.3525 | 0.28439 | # CA - CC |
| 5 | 17 | 2 | 0.500 | 0.026 | -0.382 | 0.3285 | 0.44319 | # CA - OH |
| 5 | 18 | 2 | 0.500 | 0.026 | 0.363  | 0.1750 | 0.00000 | # CA - HH |
| 5 | 19 | 2 | 0.500 | 0.026 | -0.103 | 0.3525 | 0.28439 | # CA - CC |
| 5 | 20 | 2 | 0.500 | 0.026 | 0.109  | 0.2960 | 0.18618 | # CA - HC |
| 5 | 21 | 2 | 0.500 | 0.026 | 0.073  | 0.3525 | 0.28439 | # CA - CZ |
| 5 | 22 | 2 | 0.500 | 0.026 | -0.394 | 0.3285 | 0.44319 | # CA - OH |
| 5 | 23 | 2 | 0.500 | 0.026 | 0.341  | 0.1750 | 0.00000 | # CA - HH |
| 6 | 10 | 2 | 0.500 | 0.138 | 0.287  | 0.1250 | 0.00000 | # HA - HO |
| 6 | 12 | 2 | 0.500 | 0.138 | -0.107 | 0.3025 | 0.19173 | # HA - CC |
| 6 | 13 | 2 | 0.500 | 0.138 | 0.113  | 0.2460 | 0.12552 | # HA - HC |
| 6 | 14 | 2 | 0.500 | 0.138 | -0.107 | 0.3025 | 0.19173 | # HA - CC |
| 6 | 15 | 2 | 0.500 | 0.138 | 0.097  | 0.2460 | 0.12552 | # HA - HC |
| 6 | 16 | 2 | 0.500 | 0.138 | 0.071  | 0.3025 | 0.19173 | # HA - CC |
| 6 | 17 | 2 | 0.500 | 0.138 | -0.382 | 0.2785 | 0.29880 | # HA - OH |
| 6 | 18 | 2 | 0.500 | 0.138 | 0.363  | 0.1250 | 0.00000 | # HA - HH |
| 6 | 19 | 2 | 0.500 | 0.138 | -0.103 | 0.3025 | 0.19173 | # HA - CC |
| 6 | 20 | 2 | 0.500 | 0.138 | 0.109  | 0.2460 | 0.12552 | # HA - HC |
| 6 | 21 | 2 | 0.500 | 0.138 | 0.073  | 0.3025 | 0.19173 | # HA - CZ |
| 6 | 22 | 2 | 0.500 | 0.138 | -0.394 | 0.2785 | 0.29880 | # HA - OH |
| 6 | 23 | 2 | 0.500 | 0.138 | 0.341  | 0.1250 | 0.00000 | # HA - HH |
| 7 | 17 | 2 | 0.500 | 0.018 | -0.382 | 0.3285 | 0.44319 | # CB - OH |
| 7 | 18 | 2 | 0.500 | 0.018 | 0.363  | 0.1750 | 0.00000 | # CB - HH |
| 7 | 20 | 2 | 0.500 | 0.018 | 0.109  | 0.2960 | 0.18618 | # CB - HC |
| 7 | 21 | 2 | 0.500 | 0.018 | 0.073  | 0.3525 | 0.28439 | # CB - CZ |
| 7 | 22 | 2 | 0.500 | 0.018 | -0.394 | 0.3285 | 0.44319 | # CB - OH |
| 7 | 23 | 2 | 0.500 | 0.018 | 0.341  | 0.1750 | 0.00000 | # CB - HH |
| 8 | 13 | 2 | 0.500 | 0.113 | 0.113  | 0.2460 | 0.12552 | # HA - HC |
| 8 | 15 | 2 | 0.500 | 0.113 | 0.097  | 0.2460 | 0.12552 | # HA - HC |
| 8 | 16 | 2 | 0.500 | 0.113 | 0.071  | 0.3025 | 0.19173 | # HA - CC |
| 8 | 17 | 2 | 0.500 | 0.113 | -0.382 | 0.2785 | 0.29880 | # HA - OH |

|    |    |   |       |        |        |        |         |   |    |   |    |
|----|----|---|-------|--------|--------|--------|---------|---|----|---|----|
| 8  | 18 | 2 | 0.500 | 0.113  | 0.363  | 0.1250 | 0.00000 | # | HA | - | HH |
| 8  | 19 | 2 | 0.500 | 0.113  | -0.103 | 0.3025 | 0.19173 | # | HA | - | CC |
| 8  | 20 | 2 | 0.500 | 0.113  | 0.109  | 0.2460 | 0.12552 | # | HA | - | HC |
| 8  | 21 | 2 | 0.500 | 0.113  | 0.073  | 0.3025 | 0.19173 | # | HA | - | CZ |
| 8  | 22 | 2 | 0.500 | 0.113  | -0.394 | 0.2785 | 0.29880 | # | HA | - | OH |
| 8  | 23 | 2 | 0.500 | 0.113  | 0.341  | 0.1250 | 0.00000 | # | HA | - | HH |
| 8  | 25 | 2 | 0.500 | 0.113  | -0.422 | 0.2730 | 0.33209 | # | HA | - | O  |
| 8  | 26 | 2 | 0.500 | 0.113  | -0.431 | 0.2730 | 0.33209 | # | HA | - | O  |
| 9  | 13 | 2 | 0.500 | -0.470 | 0.113  | 0.2745 | 0.29880 | # | OH | - | HC |
| 9  | 15 | 2 | 0.500 | -0.470 | 0.097  | 0.2745 | 0.29880 | # | OH | - | HC |
| 9  | 16 | 2 | 0.500 | -0.470 | 0.071  | 0.3310 | 0.45642 | # | OH | - | CC |
| 9  | 17 | 2 | 0.500 | -0.470 | -0.382 | 0.3070 | 0.71128 | # | OH | - | OH |
| 9  | 18 | 2 | 0.500 | -0.470 | 0.363  | 0.1535 | 0.00000 | # | OH | - | HH |
| 9  | 19 | 2 | 0.500 | -0.470 | -0.103 | 0.3310 | 0.45642 | # | OH | - | CC |
| 9  | 20 | 2 | 0.500 | -0.470 | 0.109  | 0.2745 | 0.29880 | # | OH | - | HC |
| 9  | 21 | 2 | 0.500 | -0.470 | 0.073  | 0.3310 | 0.45642 | # | OH | - | CZ |
| 9  | 22 | 2 | 0.500 | -0.470 | -0.394 | 0.3070 | 0.71128 | # | OH | - | OH |
| 9  | 23 | 2 | 0.500 | -0.470 | 0.341  | 0.1535 | 0.00000 | # | OH | - | HH |
| 9  | 25 | 2 | 0.500 | -0.470 | -0.422 | 0.3015 | 0.79054 | # | OH | - | O  |
| 9  | 26 | 2 | 0.500 | -0.470 | -0.431 | 0.3015 | 0.79054 | # | OH | - | O  |
| 10 | 12 | 2 | 0.500 | 0.287  | -0.107 | 0.1775 | 0.00000 | # | HO | - | CC |
| 10 | 13 | 2 | 0.500 | 0.287  | 0.113  | 0.1210 | 0.00000 | # | HO | - | HC |
| 10 | 14 | 2 | 0.500 | 0.287  | -0.107 | 0.1775 | 0.00000 | # | HO | - | CC |
| 10 | 15 | 2 | 0.500 | 0.287  | 0.097  | 0.1210 | 0.00000 | # | HO | - | HC |
| 10 | 16 | 2 | 0.500 | 0.287  | 0.071  | 0.1775 | 0.00000 | # | HO | - | CC |
| 10 | 17 | 2 | 0.500 | 0.287  | -0.382 | 0.1535 | 0.00000 | # | HO | - | OH |
| 10 | 18 | 2 | 0.500 | 0.287  | 0.363  | 0.0000 | 0.00000 | # | HO | - | HH |
| 10 | 19 | 2 | 0.500 | 0.287  | -0.103 | 0.1775 | 0.00000 | # | HO | - | CC |
| 10 | 20 | 2 | 0.500 | 0.287  | 0.109  | 0.1210 | 0.00000 | # | HO | - | HC |
| 10 | 21 | 2 | 0.500 | 0.287  | 0.073  | 0.1775 | 0.00000 | # | HO | - | CZ |
| 10 | 22 | 2 | 0.500 | 0.287  | -0.394 | 0.1535 | 0.00000 | # | HO | - | OH |
| 10 | 23 | 2 | 0.500 | 0.287  | 0.341  | 0.0000 | 0.00000 | # | HO | - | HH |
| 10 | 24 | 2 | 0.500 | 0.287  | 0.201  | 0.1875 | 0.00000 | # | HO | - | C  |
| 10 | 25 | 2 | 0.500 | 0.287  | -0.422 | 0.1480 | 0.00000 | # | HO | - | O  |
| 10 | 26 | 2 | 0.500 | 0.287  | -0.431 | 0.1480 | 0.00000 | # | HO | - | O  |
| 11 | 18 | 2 | 0.500 | -0.038 | 0.363  | 0.1775 | 0.00000 | # | CC | - | HH |
| 11 | 22 | 2 | 0.500 | -0.038 | -0.394 | 0.3310 | 0.45642 | # | CC | - | OH |
| 11 | 23 | 2 | 0.500 | -0.038 | 0.341  | 0.1775 | 0.00000 | # | CC | - | HH |
| 11 | 25 | 2 | 0.500 | -0.038 | -0.422 | 0.3255 | 0.50728 | # | CC | - | O  |
| 11 | 26 | 2 | 0.500 | -0.038 | -0.431 | 0.3255 | 0.50728 | # | CC | - | O  |
| 12 | 20 | 2 | 0.500 | -0.107 | 0.109  | 0.2985 | 0.19173 | # | CC | - | HC |
| 12 | 23 | 2 | 0.500 | -0.107 | 0.341  | 0.1775 | 0.00000 | # | CC | - | HH |
| 12 | 24 | 2 | 0.500 | -0.107 | 0.201  | 0.3650 | 0.35870 | # | CC | - | C  |
| 12 | 25 | 2 | 0.500 | -0.107 | -0.422 | 0.3255 | 0.50728 | # | CC | - | O  |
| 12 | 26 | 2 | 0.500 | -0.107 | -0.431 | 0.3255 | 0.50728 | # | CC | - | O  |
| 13 | 15 | 2 | 0.500 | 0.113  | 0.097  | 0.2420 | 0.12552 | # | HC | - | HC |
| 13 | 18 | 2 | 0.500 | 0.113  | 0.363  | 0.1210 | 0.00000 | # | HC | - | HH |
| 13 | 19 | 2 | 0.500 | 0.113  | -0.103 | 0.2985 | 0.19173 | # | HC | - | CC |
| 13 | 20 | 2 | 0.500 | 0.113  | 0.109  | 0.2420 | 0.12552 | # | HC | - | HC |
| 13 | 22 | 2 | 0.500 | 0.113  | -0.394 | 0.2745 | 0.29880 | # | HC | - | OH |
| 13 | 23 | 2 | 0.500 | 0.113  | 0.341  | 0.1210 | 0.00000 | # | HC | - | HH |
| 13 | 24 | 2 | 0.500 | 0.113  | 0.201  | 0.3085 | 0.23483 | # | HC | - | C  |
| 13 | 25 | 2 | 0.500 | 0.113  | -0.422 | 0.2690 | 0.33209 | # | HC | - | O  |
| 13 | 26 | 2 | 0.500 | 0.113  | -0.431 | 0.2690 | 0.33209 | # | HC | - | O  |
| 14 | 17 | 2 | 0.500 | -0.107 | -0.382 | 0.3310 | 0.45642 | # | CC | - | OH |
| 14 | 18 | 2 | 0.500 | -0.107 | 0.363  | 0.1775 | 0.00000 | # | CC | - | HH |
| 14 | 23 | 2 | 0.500 | -0.107 | 0.341  | 0.1775 | 0.00000 | # | CC | - | HH |
| 14 | 24 | 2 | 0.500 | -0.107 | 0.201  | 0.3650 | 0.35870 | # | CC | - | C  |
| 14 | 25 | 2 | 0.500 | -0.107 | -0.422 | 0.3255 | 0.50728 | # | CC | - | O  |
| 14 | 26 | 2 | 0.500 | -0.107 | -0.431 | 0.3255 | 0.50728 | # | CC | - | O  |

|    |    |   |       |        |        |        |         |   |    |   |    |
|----|----|---|-------|--------|--------|--------|---------|---|----|---|----|
| 15 | 16 | 2 | 0.500 | 0.097  | 0.071  | 0.2985 | 0.19173 | # | HC | - | CC |
| 15 | 17 | 2 | 0.500 | 0.097  | -0.382 | 0.2745 | 0.29880 | # | HC | - | OH |
| 15 | 18 | 2 | 0.500 | 0.097  | 0.363  | 0.1210 | 0.00000 | # | HC | - | HH |
| 15 | 22 | 2 | 0.500 | 0.097  | -0.394 | 0.2745 | 0.29880 | # | HC | - | OH |
| 15 | 23 | 2 | 0.500 | 0.097  | 0.341  | 0.1210 | 0.00000 | # | HC | - | HH |
| 15 | 24 | 2 | 0.500 | 0.097  | 0.201  | 0.3085 | 0.23483 | # | HC | - | C  |
| 15 | 25 | 2 | 0.500 | 0.097  | -0.422 | 0.2690 | 0.33209 | # | HC | - | O  |
| 15 | 26 | 2 | 0.500 | 0.097  | -0.431 | 0.2690 | 0.33209 | # | HC | - | O  |
| 16 | 24 | 2 | 0.500 | 0.071  | 0.201  | 0.3650 | 0.35870 | # | CC | - | C  |
| 16 | 25 | 2 | 0.500 | 0.071  | -0.422 | 0.3255 | 0.50728 | # | CC | - | O  |
| 16 | 26 | 2 | 0.500 | 0.071  | -0.431 | 0.3255 | 0.50728 | # | CC | - | O  |
| 17 | 20 | 2 | 0.500 | -0.382 | 0.109  | 0.2745 | 0.29880 | # | OH | - | HC |
| 17 | 23 | 2 | 0.500 | -0.382 | 0.341  | 0.1535 | 0.00000 | # | OH | - | HH |
| 17 | 24 | 2 | 0.500 | -0.382 | 0.201  | 0.3410 | 0.55900 | # | OH | - | C  |
| 17 | 25 | 2 | 0.500 | -0.382 | -0.422 | 0.3015 | 0.79054 | # | OH | - | O  |
| 17 | 26 | 2 | 0.500 | -0.382 | -0.431 | 0.3015 | 0.79054 | # | OH | - | O  |
| 18 | 19 | 2 | 0.500 | 0.363  | -0.103 | 0.1775 | 0.00000 | # | HH | - | CC |
| 18 | 20 | 2 | 0.500 | 0.363  | 0.109  | 0.1210 | 0.00000 | # | HH | - | HC |
| 18 | 22 | 2 | 0.500 | 0.363  | -0.394 | 0.1535 | 0.00000 | # | HH | - | OH |
| 18 | 23 | 2 | 0.500 | 0.363  | 0.341  | 0.0000 | 0.00000 | # | HH | - | HH |
| 18 | 24 | 2 | 0.500 | 0.363  | 0.201  | 0.1875 | 0.00000 | # | HH | - | C  |
| 18 | 25 | 2 | 0.500 | 0.363  | -0.422 | 0.1480 | 0.00000 | # | HH | - | O  |
| 18 | 26 | 2 | 0.500 | 0.363  | -0.431 | 0.1480 | 0.00000 | # | HH | - | O  |
| 19 | 24 | 2 | 0.500 | -0.103 | 0.201  | 0.3650 | 0.35870 | # | CC | - | C  |
| 19 | 25 | 2 | 0.500 | -0.103 | -0.422 | 0.3255 | 0.50728 | # | CC | - | O  |
| 19 | 26 | 2 | 0.500 | -0.103 | -0.431 | 0.3255 | 0.50728 | # | CC | - | O  |
| 20 | 23 | 2 | 0.500 | 0.109  | 0.341  | 0.1210 | 0.00000 | # | HC | - | HH |
| 20 | 24 | 2 | 0.500 | 0.109  | 0.201  | 0.3085 | 0.23483 | # | HC | - | C  |
| 20 | 25 | 2 | 0.500 | 0.109  | -0.422 | 0.2690 | 0.33209 | # | HC | - | O  |
| 20 | 26 | 2 | 0.500 | 0.109  | -0.431 | 0.2690 | 0.33209 | # | HC | - | O  |
| 21 | 24 | 2 | 0.500 | 0.073  | 0.201  | 0.3650 | 0.35870 | # | CZ | - | C  |
| 21 | 25 | 2 | 0.500 | 0.073  | -0.422 | 0.3255 | 0.50728 | # | CZ | - | O  |
| 21 | 26 | 2 | 0.500 | 0.073  | -0.431 | 0.3255 | 0.50728 | # | CZ | - | O  |
| 22 | 24 | 2 | 0.500 | -0.394 | 0.201  | 0.3410 | 0.55900 | # | OH | - | C  |
| 22 | 25 | 2 | 0.500 | -0.394 | -0.422 | 0.3015 | 0.79054 | # | OH | - | O  |
| 22 | 26 | 2 | 0.500 | -0.394 | -0.431 | 0.3015 | 0.79054 | # | OH | - | O  |
| 23 | 24 | 2 | 0.500 | 0.341  | 0.201  | 0.1875 | 0.00000 | # | HH | - | C  |
| 23 | 25 | 2 | 0.500 | 0.341  | -0.422 | 0.1480 | 0.00000 | # | HH | - | O  |
| 23 | 26 | 2 | 0.500 | 0.341  | -0.431 | 0.1480 | 0.00000 | # | HH | - | O  |

; Exclusions from default nonbonded

[ exclusions ]

; ai aj

|   |    |
|---|----|
| 1 | 2  |
| 1 | 3  |
| 1 | 4  |
| 1 | 5  |
| 1 | 6  |
| 1 | 7  |
| 1 | 8  |
| 1 | 9  |
| 1 | 10 |
| 1 | 11 |
| 1 | 12 |
| 1 | 13 |
| 1 | 14 |
| 1 | 15 |
| 1 | 16 |
| 1 | 17 |
| 1 | 18 |

1 19  
1 20  
1 21  
1 22  
1 23  
1 24  
1 25  
1 26  
2 3  
2 4  
2 5  
2 6  
2 7  
2 8  
2 9  
2 10  
2 11  
2 12  
2 13  
2 14  
2 15  
2 16  
2 17  
2 18  
2 19  
2 20  
2 21  
2 22  
2 23  
2 24  
2 25  
2 26  
3 4  
3 5  
3 6  
3 7  
3 8  
3 9  
3 10  
3 11  
3 12  
3 13  
3 14  
3 15  
3 16  
3 17  
3 18  
3 19  
3 20  
3 21  
3 22  
3 23  
3 24  
3 25  
3 26  
4 5  
4 6  
4 7  
4 8  
4 9

4 10  
4 11  
4 12  
4 13  
4 14  
4 15  
4 16  
4 17  
4 18  
4 19  
4 20  
4 21  
4 22  
4 23  
4 24  
4 25  
4 26  
5 6  
5 7  
5 8  
5 9  
5 10  
5 11  
5 12  
5 13  
5 14  
5 15  
5 16  
5 17  
5 18  
5 19  
5 20  
5 21  
5 22  
5 23  
5 24  
5 25  
5 26  
6 7  
6 8  
6 9  
6 10  
6 11  
6 12  
6 13  
6 14  
6 15  
6 16  
6 17  
6 18  
6 19  
6 20  
6 21  
6 22  
6 23  
6 24  
6 25  
6 26  
7 8  
7 9

7 10  
7 11  
7 12  
7 13  
7 14  
7 15  
7 16  
7 17  
7 18  
7 19  
7 20  
7 21  
7 22  
7 23  
7 24  
7 25  
7 26  
8 9  
8 10  
8 11  
8 12  
8 13  
8 14  
8 15  
8 16  
8 17  
8 18  
8 19  
8 20  
8 21  
8 22  
8 23  
8 24  
8 25  
8 26  
9 10  
9 11  
9 12  
9 13  
9 14  
9 15  
9 16  
9 17  
9 18  
9 19  
9 20  
9 21  
9 22  
9 23  
9 24  
9 25  
9 26  
10 11  
10 12  
10 13  
10 14  
10 15  
10 16  
10 17  
10 18

10 19  
10 20  
10 21  
10 22  
10 23  
10 24  
10 25  
10 26  
11 12  
11 13  
11 14  
11 15  
11 16  
11 17  
11 18  
11 19  
11 20  
11 21  
11 22  
11 23  
11 24  
11 25  
11 26  
12 13  
12 14  
12 15  
12 16  
12 17  
12 18  
12 19  
12 20  
12 21  
12 22  
12 23  
12 24  
12 25  
12 26  
13 14  
13 15  
13 16  
13 17  
13 18  
13 19  
13 20  
13 21  
13 22  
13 23  
13 24  
13 25  
13 26  
14 15  
14 16  
14 17  
14 18  
14 19  
14 20  
14 21  
14 22  
14 23  
14 24

14 25  
14 26  
15 16  
15 17  
15 18  
15 19  
15 20  
15 21  
15 22  
15 23  
15 24  
15 25  
15 26  
16 17  
16 18  
16 19  
16 20  
16 21  
16 22  
16 23  
16 24  
16 25  
16 26  
17 18  
17 19  
17 20  
17 21  
17 22  
17 23  
17 24  
17 25  
17 26  
18 19  
18 20  
18 21  
18 22  
18 23  
18 24  
18 25  
18 26  
19 20  
19 21  
19 22  
19 23  
19 24  
19 25  
19 26  
20 21  
20 22  
20 23  
20 24  
20 25  
20 26  
21 22  
21 23  
21 24  
21 25  
21 26  
22 23  
22 24

22 25  
22 26  
23 24  
23 25  
23 26  
24 25  
24 26  
25 26
